# Supplementary material for: Zinc-catalyzed asymmetric [3 + 2] annulations for the construction of chiral spiro[1-indanone-γ-butyrolactones] via a C–N bond cleavage process
Source: Royal Society of Chemistry journal article supplement (doi:10.1039/d2qo01204a), 2022-01-01
Supplement: d2qo01204a1.pdf [file d2qo01204a1.pdf]

## Supporting Information

### **Zinc-catalyzed asymmetric [3 + 2] annulations for construction of chiral spiro[1-indanone- $\gamma$ -butyrolactones] via a C–N bond cleavage process**

Jiao-Jiao Han, Cui Zhang, Guang-Jian Mei, Yuan-Zhao Hua,\*

Shi-Kun Jia\* and Min-Can Wang\*

College of Chemistry and Institute of Green Catalysis, Zhengzhou University, Zhengzhou City, Henan  
450000, P. R. China

Email: hyzh@zzu.edu.cn, jiashikun@zzu.edu.cn, wangmincan@zzu.edu.cn

### **Table of Contents**

|                                                                                    |            |
|------------------------------------------------------------------------------------|------------|
| <b>1. General Information</b>                                                      | <b>S2</b>  |
| <b>2. General Procedure for optimization of the reaction conditions</b>            | <b>S2</b>  |
| <b>3. Synthesis of chiral spiro[1-indanone-<math>\gamma</math>-butyrolactones]</b> | <b>S2</b>  |
| <b>4. Mmol-scale reaction</b>                                                      | <b>S13</b> |
| <b>5. Derivatization</b>                                                           | <b>S13</b> |
| <b>6. References</b>                                                               | <b>S17</b> |
| <b>7. NMR Spectra</b>                                                              | <b>S18</b> |
| <b>8. HPLC</b>                                                                     | <b>S47</b> |
| <b>9. Single-crystal X-ray diffraction</b>                                         | <b>S75</b> |

## General Information

All reactions were carried out under an atmosphere of argon using oven-dried glassware. Super dry solvents, metal catalysts, were purchased from chemical companies and used without further treatment. Flash column chromatography was performed using silica gel (300-400 mesh).  $^1\text{H}$  NMR,  $^{13}\text{C}$  NMR,  $^{19}\text{F}$  NMR spectra were recorded in  $\text{CDCl}_3$  or  $\text{DMSO}-d_6$  on a 400 MHz spectrometer; chemical shifts are reported in ppm with the solvent signals as reference, and coupling constants ( $J$ ) are given in Hertz. The peak information is described as: s = singlet, d = doublet, t = triplet, q = quartet, m = multiplet. High-resolution mass spectra (HRMS) were obtained using an Agilent LC-MSAD-Trap-XCT instrument using electrospray ionization time-of-flight (ESI-TOF). High performance liquid chromatography (HPLC) was performed on instrument consisted of JASCO model PU-1580 intelligent HPLC pump and JASCO model UV-1575 intelligent UV-vis detector (254 nm) using Daicel Chiralpak IC, IE, IF (4.6 mm  $\times$  250 mm) columns. Melting points were determined using YRT-3 melting point apparatus. Optical rotations were measured with Perkin Elmer, model 341 Polarimeter. The instrumentation used for the crystal measurement is Oxford Gemini E X-ray single-crystal diffractometer.  $\alpha$ -Hydroxy-1-indanone<sup>1</sup> and methyleneindolinone<sup>2</sup> were synthesized according to the literature.

## General Procedure for optimization of the reaction conditions.

Under a nitrogen atmosphere, a solution of diethylzinc (20  $\mu\text{L}$ , 1.0 M in hexane, 0.02 mmol) was added dropwise to a solution of **L** (0.01 mmol) in solvent (2 mL). After the mixture was stirred for 30 min at 20  $^\circ\text{C}$ , then,  $\alpha$ -hydroxy-1-indanone **1a** (0.1 mmol, 14.8 mg), methyleneindolinone **2a** (0.1 mmol, 34.9 mg), and additives were added. The reaction mixture was stirred for corresponding time at the same temperature. The reaction was quenched with  $\text{NH}_4\text{Cl}$  solution (2 mL), and the organic layer was extracted with  $\text{CH}_2\text{Cl}_2$  (3  $\times$  5 mL). The combined organic layer was washed with brine and dried over  $\text{Na}_2\text{SO}_4$ . The solvent was removed under reduced pressure by using a rotary evaporator. The residue was purified by flash chromatography with petroleum ether/ethyl acetate (4/1) to afford the desired product **3a**.

## Synthesis of chiral spiro[1-indanone- $\gamma$ -butyrolactones]

Under a nitrogen atmosphere, a solution of diethylzinc (40  $\mu\text{L}$ , 1.0 M in hexane, 0.04 mmol) was added dropwise to a solution of **L4** (0.02 mmol, 19.0 mg) in THF (2 mL). After the mixture was stirred for 30 min at 20  $^\circ\text{C}$ . Then,  $\alpha$ -hydroxy-1-indanone **1a** (0.2 mmol, 29.6 mg), methyleneindolinone **2a** (0.2 mmol, 69.8 mg) and 2-Br-4-ClPhOH (2.0 eq, 82.8 mg) were added. The reaction mixture was stirred for 24 h at the same temperature. The reaction was quenched with  $\text{NH}_4\text{Cl}$  solution (4 mL), and the organic layer was extracted with  $\text{CH}_2\text{Cl}_2$  (3  $\times$  5 mL). The combined organic layer was washed with brine and dried over  $\text{Na}_2\text{SO}_4$ . The solvent was removed under reduced pressure by using a rotary evaporator. The residue was purified by flash chromatography with petroleum ether/ethyl acetate (5/1) to afford the desired product **3**.

**tert-Butyl(2-((2*R*,3*R*,4*S*)-3-benzoyl-1',5-dioxo-1',3',4,5-tetrahydro-3*H*-spiro[furan-2,2'-inden]-4-yl)phenyl)carbamate (3a):**

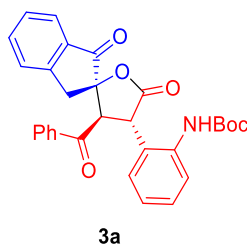

Followed the general procedure, using **1a** (0.2 mmol, 29.6 mg), **2a** (0.2 mmol, 69.8 mg) and **L4** (0.02 mmol, 19.0 mg). Purified by flash column chromatography (petroleum ether/ethyl acetate 4:1) to afforded **3a** as a white solid (64.6 mg, 65% yield, 10:1 dr);  $[\alpha]_{\text{D}}^{20} = -19.9$  ( $c = 1.0$ , THF, 95% ee); **m.p.** = 108.0-109.2 °C; **<sup>1</sup>H NMR** (400 MHz, CDCl<sub>3</sub>)  $\delta$  7.75 – 7.64 (m, 1H), 7.64 – 7.56 (m, 3H), 7.54 – 7.44 (m, 2H), 7.39 – 7.28 (m, 3H), 7.24 (d,  $J = 7.4$  Hz, 2H), 7.20 – 7.13 (m, 3H), 5.02 – 4.75 (m, 2H), 3.37 (dd,  $J = 44.2, 17.7$  Hz, 2H), 1.60 (s, 9H); **<sup>13</sup>C NMR** (101 MHz, CDCl<sub>3</sub>)  $\delta$  199.2, 196.1, 174.0, 153.9, 150.0, 136.9, 136.8, 135.2, 134.5, 133.8, 129.1, 129.0, 128.7, 128.5, 126.4, 125.4, 125.0, 84.7, 80.6, 56.5, 44.2, 35.9, 28.4; **HRMS** (ESI):  $m/z$   $[M + \text{Na}]^+$  calcd for  $[\text{C}_{30}\text{H}_{27}\text{NNaO}_6]^+$ : 520.1731, found: 520.1726; **HPLC**: Daicel Chiralpak IF, *n*-hexane/*i*-PrOH = 70/30, flow rate = 1 mL/min,  $\lambda = 254$  nm, major product:  $t_{\text{major}} = 21.16$  min and  $t_{\text{minor}} = 15.95$  min; minor product:  $t_{\text{major}} = 12.29$  min and  $t_{\text{minor}} = 11.00$  min.

**tert-Butyl(2-((2*R*,3*R*,4*S*)-3-benzoyl-5'-methyl-1',5'-dioxo-1',3',4,5-tetrahydro-3*H*-spiro[furan-2,2'-inden]-4-yl)phenyl)carbamate (3b):**

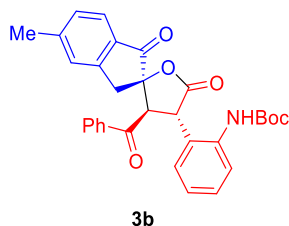

Followed the general procedure, using **1b** (0.2 mmol, 32.8 mg), **2a** (0.2 mmol, 70.2 mg) and **L4** (0.02 mmol, 19.0 mg). Purified by flash column chromatography (petroleum ether/ethyl acetate 4:1) to afforded **3b** as a light yellow oil (54.2 mg, 53% yield, 10:1 dr);  $[\alpha]_{\text{D}}^{20} = -23.6$  ( $c = 1.0$ , THF, 90% ee); **<sup>1</sup>H NMR** (400 MHz, CDCl<sub>3</sub>)  $\delta$  7.74 – 7.65 (m, 1H), 7.63 (d,  $J = 7.4$  Hz, 2H), 7.58 – 7.47 (m, 2H), 7.41 – 7.34 (m, 1H), 7.34 – 7.27 (m, 2H), 7.25 – 7.11 (m, 3H), 7.09 – 6.99 (m, 2H), 5.00 – 4.91 (m, 2H), 3.31 (dd,  $J = 39.6, 17.7$  Hz, 2H), 2.33 (s, 3H), 1.59 (s, 9H); **<sup>13</sup>C NMR** (101 MHz, CDCl<sub>3</sub>)  $\delta$  198.4, 196.2, 174.1, 153.8, 150.5, 148.6, 136.9, 135.2, 134.5, 131.5, 129.8, 129.1, 128.9, 128.7, 128.6, 126.6, 125.3, 124.9, 85.0, 80.6, 56.3, 44.2, 35.8, 28.4, 22.2; **HRMS** (ESI):  $m/z$   $[M + \text{Na}]^+$  calcd for  $[\text{C}_{31}\text{H}_{29}\text{NNaO}_6]^+$ : 534.1887, found: 534.1885; **HPLC**: Daicel Chiralpak IF, *n*-hexane/*i*-PrOH = 70/30, flow rate = 1 mL/min,  $\lambda = 254$  nm,  $t_{\text{major}} = 29.73$  min and  $t_{\text{minor}} = 17.43$  min.

**tert-Butyl(2-((2*R*,3*R*,4*S*)-3-benzoyl-5'-fluoro-1',5'-dioxo-1',3',4,5-tetrahydro-3*H*-spiro[furan-2,2'-inden]-4-yl)phenyl)carbamate (3c):**

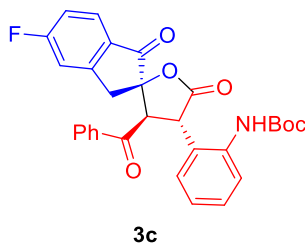

Followed the general procedure, using **1c** (0.2 mmol, 33.6 mg), **2a** (0.2 mmol, 69.5 mg) and **L4** (0.02 mmol, 19.0 mg). Purified by flash column chromatography (petroleum ether/ethyl acetate 4:1) to afforded **3c** as a light yellow oil (65.9 mg, 64% yield, 17:1 dr);  $[\alpha]_{\text{D}}^{20} = -131.0$  ( $c = 1.0$ , THF, 90% ee); **<sup>1</sup>H NMR** (400 MHz, CDCl<sub>3</sub>)  $\delta$  7.75 – 7.57 (m, 4H), 7.45 (s, 1H), 7.42 – 7.36 (m, 1H), 7.34 – 7.27 (m, 2H), 7.25 – 7.14 (m, 3H), 7.00 – 6.87 (m, 2H), 5.00 – 4.90 (m, 2H), 3.36 (dd,  $J = 45.0, 18.0$  Hz, 2H), 1.60 (s, 9H); **<sup>13</sup>C NMR** (101 MHz, CDCl<sub>3</sub>)  $\delta$  197.3, 196.0, 173.8, 168.1 (d,  $J = 260.9$  Hz), 153.9, 153.0 (d,  $J = 10.8$  Hz), 136.9, 135.1, 134.7, 130.2, 129.2, 129.1, 128.8, 128.5, 127.7, 127.6, 125.5, 117.1 (d,  $J = 23.9$  Hz), 113.3 (d,  $J = 22.9$  Hz), 84.7, 80.6, 56.4, 44.2, 35.8, 28.4; **<sup>19</sup>F NMR** (376 MHz, CDCl<sub>3</sub>)  $\delta$  -

97.7; **HRMS** (ESI):  $m/z$   $[M + Na]^+$  calcd for  $[C_{30}H_{26}FNNaO_6]^+$ : 538.1636, found: 538.1632; **HPLC**: Daicel Chiralpak IF, *n*-hexane/*i*-PrOH = 70/30, flow rate = 1 mL/min,  $\lambda$  = 254 nm, major product:  $t_{major}$  = 18.87 min and  $t_{minor}$  = 14.53 min; minor product:  $t_{major}$  = 11.05 min and  $t_{minor}$  = 12.35 min.

***tert*-Butyl(2-((2*R*,3*R*,4*S*)-3-benzoyl-5'-chloro-1',5'-dioxo-1',3',4,5-tetrahydro-3*H*-spiro[furan-2,2'-inden]-4-yl)phenyl)carbamate (3d):**

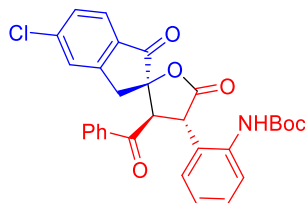

**3d**

Followed the general procedure, using **1d** (0.2 mmol, 37.2 mg), **2a** (0.2 mmol, 69.8 mg) and **L4** (0.02 mmol, 19.0 mg). Purified by flash column chromatography (petroleum ether/ethyl acetate 4:1) to afforded **3d** as a light yellow oil (64.8 mg, 61% yield 16:1 dr);  $[\alpha]_D^{20}$  = -121.0 ( $c$  = 1.0, THF, 92% ee); **<sup>1</sup>H NMR** (400 MHz,  $CDCl_3$ )  $\delta$  7.74 – 7.64 (m, 1H), 7.64 – 7.57 (m, 2H), 7.54 (d,  $J$  = 8.2 Hz, 1H), 7.46 – 7.36 (m, 2H), 7.35 – 7.27 (m, 2H), 7.25 – 7.12 (m, 5H), 5.03 – 4.84 (m, 2H), 3.34 (dd,  $J$  = 43.8, 17.9 Hz, 2H), 1.60 (s, 9H); **<sup>13</sup>C NMR** (101 MHz,  $CDCl_3$ )  $\delta$  197.8, 196.0, 173.8, 153.9, 151.4, 143.5, 136.9, 135.1, 134.7, 132.2, 129.4, 129.2, 129.1, 128.8, 128.6, 126.6, 126.1, 125.5, 84.6, 80.7, 56.4, 44.2, 35.7, 28.4; **HRMS** (ESI):  $m/z$   $[M + Na]^+$  calcd for  $[C_{30}H_{26}ClNNaO_6]^+$ : 554.1341, found: 554.1340; **HPLC**: Daicel Chiralpak IF, *n*-hexane/*i*-PrOH = 70/30, flow rate = 1 mL/min,  $\lambda$  = 254 nm,  $t_{major}$  = 23.70 min and  $t_{minor}$  = 15.24 min.

***tert*-Butyl(2-((2*R*,3*R*,4*S*)-3-benzoyl-5'-bromo-1',5'-dioxo-1',3',4,5-tetrahydro-3*H*-spiro[furan-2,2'-inden]-4-yl)phenyl)carbamate (3e):**

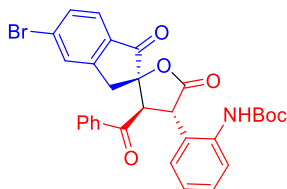

**3e**

Followed the general procedure, using **1e** (0.2 mmol, 45.5 mg), **2a** (0.2 mmol, 70.3 mg) and **L4** (0.02 mmol, 19.0 mg). Purified by flash column chromatography (petroleum ether/ethyl acetate 4:1) to afforded **3e** as a light yellow oil (51.8 mg, 45% yield, 15:1 dr);  $[\alpha]_D^{20}$  = -98.6 ( $c$  = 1.0, THF, 93% ee); **<sup>1</sup>H NMR** (400 MHz,  $CDCl_3$ )  $\delta$  7.72 – 7.64 (m, 1H), 7.60 (d,  $J$  = 7.4 Hz, 2H), 7.51 – 7.35 (m, 5H), 7.34 – 7.28 (m, 2H), 7.25 – 7.14 (m, 3H), 4.99 – 4.89 (m, 2H), 3.35 (dd,  $J$  = 42.8, 17.9 Hz, 2H), 1.60 (s, 9H); **<sup>13</sup>C NMR** (101 MHz,  $CDCl_3$ )  $\delta$  198.1, 196.0, 173.8, 153.9, 151.4, 136.9, 135.1, 134.7, 132.6, 132.5, 132.3, 129.7, 129.2, 129.1, 128.8, 128.6, 126.1, 125.5, 84.5, 80.7, 56.4, 44.2, 35.6, 28.4; **HRMS** (ESI):  $m/z$   $[M + Na]^+$  calcd for  $[C_{30}H_{26}BrNNaO_6]^+$ : 598.0836, found: 598.0835; **HPLC**: Daicel Chiralpak IF, *n*-hexane/*i*-PrOH = 80/20, flow rate = 1 mL/min,  $\lambda$  = 254 nm,  $t_{major}$  = 44.15 min and  $t_{minor}$  = 25.05 min.

***tert*-Butyl(2-((2*R*,3*R*,4*S*)-3-benzoyl-6'-methoxy-1',5'-dioxo-1',3',4,5-tetrahydro-3*H*-spiro[furan-2,2'-inden]-4-yl)phenyl)carbamate (3f):**

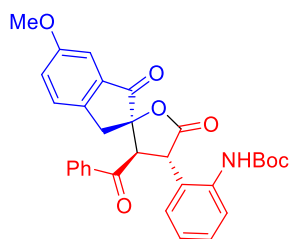

**3f**

Followed the general procedure, using **1f** (0.2 mmol, 36.8 mg), **2a** (0.2 mmol, 68.3 mg) and **L4** (0.02 mmol, 19.0 mg). Purified by flash column chromatography (petroleum ether/ethyl acetate 2:1) to afforded **3f** as a light yellow oil (61.2 mg, 58% yield, 10:1 dr);  $[\alpha]_D^{20} = -103.0$  ( $c = 1.0$ , THF, 91% ee); **<sup>1</sup>H NMR** (400 MHz, CDCl<sub>3</sub>)  $\delta$  7.76 – 7.65 (m, 1H), 7.58 (d,  $J = 8.1$  Hz, 2H), 7.52 (s, 1H), 7.39 – 7.28 (m, 3H), 7.24 – 7.14 (m, 3H), 7.13 – 7.04 (m, 2H), 6.99 – 6.94 (m, 1H), 4.99 – 4.87 (m, 2H), 3.72 (s, 3H), 3.28 (dd,  $J = 51.6, 17.3$  Hz, 2H), 1.59 (s, 9H); **<sup>13</sup>C NMR** (101 MHz, CDCl<sub>3</sub>)  $\delta$  199.1, 196.1, 174.0, 160.0, 153.9, 142.8, 136.9, 135.3, 135.0, 134.4, 129.2, 129.0, 128.7, 128.4, 127.2, 127.2, 126.2, 125.4, 105.9, 85.4, 80.6, 56.7, 55.6, 44.2, 35.1, 28.4; **HRMS** (ESI):  $m/z$   $[M + Na]^+$  calcd for  $[C_{31}H_{29}NNaO_7]^+$ : 550.1836, found: 550.1837; **HPLC**: Daicel Chiralpak IF,  $n$ -hexane/ $i$ -PrOH = 80/20, flow rate = 1 mL/min,  $\lambda = 254$  nm,  $t_{major} = 47.80$  min and  $t_{minor} = 30.66$  min.

**tert-Butyl(2-((2*R*,3*R*,4*S*)-3-benzoyl-6'-methyl-1',5-dioxo-1',3',4,5-tetrahydro-3*H*-spiro[furan-2,2'-inden]-4-yl)phenyl)carbamate (3g):**

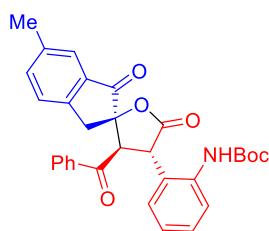

**3g**

Followed the general procedure, using **1g** (0.2 mmol, 31.6mg), **2a** (0.2 mmol, 71.2 mg) and **L4** (0.02 mmol, 19.0 mg). Purified by flash column chromatography (petroleum ether/ethyl acetate 4:1) to afforded **3g** as a light yellow oil (61.3 mg, 60% yield, 11:1 dr);  $[\alpha]_D^{20} = -26.3$  ( $c = 1.0$ , THF, 93% ee); **<sup>1</sup>H NMR** (400 MHz, CDCl<sub>3</sub>)  $\delta$  7.74 – 7.64 (m, 1H), 7.62 – 7.57 (m, 2H), 7.53 (s, 1H), 7.40 – 7.28 (m, 5H), 7.21 – 7.13 (m, 3H), 7.11 (d,  $J = 7.8$  Hz, 1H), 4.95 (s, 2H), 3.30 (dd,  $J = 44.2, 17.6$  Hz, 2H), 2.27 (s, 3H), 1.60 (s, 9H); **<sup>13</sup>C NMR** (101 MHz, CDCl<sub>3</sub>)  $\delta$  199.1, 196.2, 174.1, 153.9, 147.4, 138.7, 138.1, 136.9, 135.2, 134.3, 133.9, 129.1, 129.0, 128.7, 128.5, 126.1, 125.4, 124.8, 85.1, 80.6, 56.5, 44.2, 35.5, 28.4, 21.0; **HRMS** (ESI):  $m/z$   $[M + Na]^+$  calcd for  $[C_{31}H_{29}NNaO_6]^+$ : 534.1887, found: 534.1888; **HPLC**: Daicel Chiralpak IF,  $n$ -hexane/ $i$ -PrOH = 80/20, flow rate = 1 mL/min,  $\lambda = 254$  nm, major product:  $t_{major} = 35.26$  min and  $t_{minor} = 26.62$  min; minor product:  $t_{major} = 17.84$  min and  $t_{minor} = 24.76$  min.

**tert-Butyl(2-((2*R*,3*R*,4*S*)-3-benzoyl-6'-chloro-1',5-dioxo-1',3',4,5-tetrahydro-3*H*-spiro[furan-2,2'-inden]-4-yl)phenyl)carbamate (3h):**

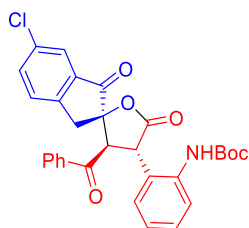

**3h**

Followed the general procedure, using **1h** (0.2 mmol, 37.8 mg), **2a** (0.2 mmol, 67.2 mg) and **L4** (0.02 mmol, 19.0 mg). Purified by flash column chromatography (petroleum ether/ethyl acetate 4:1) to afforded **3h** as a white solid (53.1 mg, 50% yield, 10:1 dr);  $[\alpha]_D^{20} = -69.5$  ( $c = 1.0$ , THF, 90% ee); **m.p.** = 87.5–88.3 °C; **<sup>1</sup>H NMR** (400 MHz, CDCl<sub>3</sub>)  $\delta$  7.72 – 7.62 (m, 1H), 7.61 – 7.55 (m, 2H), 7.54 – 7.49 (m,  $J = 1.8$  Hz, 1H), 7.48 – 7.35 (m, 3H), 7.33 – 7.28 (m, 2H), 7.25 – 7.13 (m, 4H), 5.00 – 4.87 (m, 2H), 3.33 (dd,  $J = 50.7, 17.8$  Hz, 2H), 1.60 (s, 9H); **<sup>13</sup>C NMR** (101 MHz, CDCl<sub>3</sub>)  $\delta$  198.2, 196.0, 173.80, 154.0, 147.9, 136.9, 136.7, 135.2, 134.6, 129.2, 129.1, 128.9, 128.5, 127.6, 125.6, 124.6, 84.9, 80.7, 56.6, 44.2, 35.5, 28.4; **HRMS** (ESI):  $m/z$   $[M + Na]^+$  calcd for  $[C_{30}H_{26}ClNNaO_6]^+$ : 554.1341, found: 554.1340; **HPLC**: Daicel Chiralpak IF, *n*-hexane/*i*-PrOH = 70/30, flow rate = 1 mL/min,  $\lambda = 254$  nm, major product:  $t_{major} = 20.27$  min and  $t_{minor} = 15.94$  min; minor product:  $t_{major} = 10.74$  min and  $t_{minor} = 14.87$  min.

**tert-Butyl(2-((2*R*,3*R*,4*S*)-3-benzoyl-4'-methoxy-1',5-dioxo-1',3',4,5-tetrahydro-3*H*-spiro[furan-2,2'-inden]-4-yl)phenyl)carbamate (3i):**

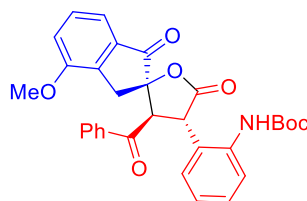

**3i**

Followed the general procedure, using **1i** (0.2 mmol, 36.2 mg), **2a** (0.2 mmol, 71.4 mg) and **L4** (0.02 mmol, 19.0 mg). Purified by flash column chromatography (petroleum ether/ethyl acetate 2:1) to afforded **3i** as a light yellow oil (61.2 mg, 58% yield, 9:1 dr);  $[\alpha]_D^{20} = -15.8$  ( $c = 1.0$ , THF, 95% ee); **<sup>1</sup>H NMR** (400 MHz, CDCl<sub>3</sub>)  $\delta$  7.76 – 7.65 (m, 1H), 7.62 (d,  $J = 7.5$  Hz, 2H), 7.59 (s, 1H), 7.38 – 7.27 (m, 3H), 7.24 – 7.12 (m, 5H), 6.95 – 6.87 (m, 1H), 5.01 – 4.88 (m, 2H), 3.79 (s, 2H), 3.23 (dd,  $J = 54.4, 18.2$  Hz, 2H), 1.60 (s, 9H); **<sup>13</sup>C NMR** (101 MHz, CDCl<sub>3</sub>)  $\delta$  199.4, 196.2, 174.1, 156.3, 153.8, 139.1, 137.0, 135.2, 135.0, 134.4, 130.1, 129.1, 128.9, 128.7, 128.6, 128.5, 127.1, 125.3, 116.8, 116.4, 84.6, 80.6, 56.66, 55.6, 44.0, 32.8, 28.4; **HRMS** (ESI):  $m/z$   $[M + Na]^+$  calcd for  $[C_{31}H_{29}NNaO_7]^+$ : 550.1836, found: 550.1838; **HPLC**: Daicel Chiralpak IF, *n*-hexane/*i*-PrOH = 70/30, flow rate = 1 mL/min,  $\lambda = 254$  nm,  $t_{major} = 21.19$  min and  $t_{minor} = 13.89$  min.

**tert-Butyl(2-((2*R*,3*R*,4*S*)-3-benzoyl-4'-methyl-1',5-dioxo-1',3',4,5-tetrahydro-3*H*-spiro[furan-2,2'-inden]-4-yl)phenyl)carbamate (3j):**

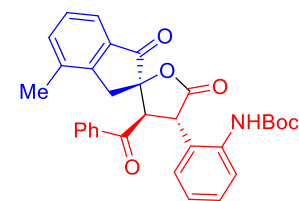

**3j**

Followed the general procedure, using **1j** (0.2 mmol, 32.8 mg), **2a** (0.2 mmol, 70.4 mg) and **L4** (0.02 mmol, 19.0 mg). Purified by flash column chromatography (petroleum ether/ethyl acetate 3:1) to afforded **3j** as a light yellow oil (56.2 mg, 55% yield, 11:1 dr);  $[\alpha]_D^{20} = -47.3$  ( $c = 1.0$ , THF, 92% ee); **<sup>1</sup>H NMR** (400 MHz, CDCl<sub>3</sub>)  $\delta$  7.68 (m, 1H), 7.60 (d,  $J = 7.5$  Hz, 2H), 7.52 (s, 1H), 7.49 – 7.44 (m, 1H), 7.36 – 7.31 (m, 2H), 7.29 (d,  $J = 7.4$  Hz, 2H), 7.21 – 7.12 (m, 4H), 5.02 – 4.93 (m, 2H), 3.22 (dd,  $J = 39.7, 17.7$  Hz, 2H), 2.18 (s, 3H), 1.59 (s, 9H); **<sup>13</sup>C NMR** (101 MHz, CDCl<sub>3</sub>)  $\delta$  199.5, 196.3, 174.1, 153.9, 149.0, 137.2, 136.9, 135.7, 135.2, 134.5, 133.6, 129.1, 129.0, 128.8, 128.7, 128.6, 128.4, 127.2, 125.4, 122.4, 84.8, 80.6, 56.4, 44.2, 34.8, 28.4, 17.7; **HRMS** (ESI):  $m/z$   $[M + Na]^+$  calcd for

[C<sub>31</sub>H<sub>29</sub>NNaO<sub>6</sub>]<sup>+</sup>: 534.1887, found: 534.1887; **HPLC**: Daicel Chiralpak IE, *n*-hexane/*i*-PrOH = 80/20, flow rate = 1 mL/min, λ = 254 nm, major product: *t*<sub>major</sub> = 48.91 min and *t*<sub>minor</sub> = 41.19 min; minor product: *t*<sub>major</sub> = 34.80 min and *t*<sub>minor</sub> = 45.42 min.

***tert*-Butyl(2-((2*R*,3*R*,4*S*)-3-benzoyl-4'-chloro-1',5-dioxo-1',3',4,5-tetrahydro-3*H*-spiro[furan-2,2'-inden]-4-yl)phenyl)carbamate (3k):**

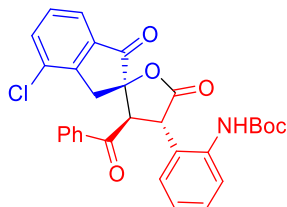

**3k**

Followed the general procedure, using **1k** (0.2 mmol, 37.5 mg), **2a** (0.2 mmol, 68.8 mg) and **L4** (0.02 mmol, 19.0 mg). Purified by flash column chromatography (petroleum ether/ethyl acetate 4:1) to afforded **3k** as a light yellow oil (46.7 mg, 44% yield, 20:1 dr); [ $\alpha$ ]<sub>D</sub><sup>20</sup> = -174.0 (c = 1.0, THF, 90% ee); **<sup>1</sup>H NMR** (400 MHz, CDCl<sub>3</sub>) δ 7.74 – 7.65 (m, 1H), 7.64 – 7.57 (m, 2H), 7.56 – 7.52 (m, 1H), 7.51 – 7.42 (m, 2H), 7.38 – 7.28 (m, 3H), 7.25 – 7.14 (m, 4H), 5.01 – 4.92 (m, 2H), 3.33 (dd, *J* = 43.8, 18.3 Hz, 2H), 1.60 (s, 9H); **<sup>13</sup>C NMR** (101 MHz, CDCl<sub>3</sub>) δ 198.7, 196.1, 173.8, 153.9, 147.9, 136.9, 136.2, 135.6, 135.2, 134.6, 132.6, 129.9, 129.2, 129.1, 128.8, 128.4, 125.5, 123.2, 84.2, 80.7, 56.6, 44.0, 35.1, 28.4; **HRMS** (ESI): *m/z* [M + Na]<sup>+</sup> calcd for [C<sub>30</sub>H<sub>26</sub>CINNaO<sub>6</sub>]<sup>+</sup>: 554.1341, found: 554.1344; **HPLC**: Daicel Chiralpak IF, *n*-hexane/*i*-PrOH = 80/20, flow rate = 1 mL/min, λ = 254 nm, *t*<sub>major</sub> = 25.85 min and *t*<sub>minor</sub> = 18.19 min.

***tert*-Butyl(2-((2*R*,3*R*,4*S*)-3-benzoyl-4'-bromo-1',5-dioxo-1',3',4,5-tetrahydro-3*H*-spiro[furan-2,2'-inden]-4-yl)phenyl)carbamate (3l):**

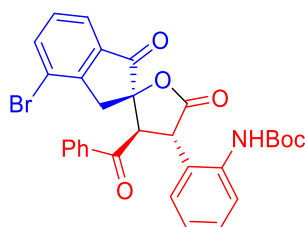

**3l**

Followed the general procedure, using **1l** (0.2 mmol, 46.5 mg), **2a** (0.2 mmol, 69.8 mg) and **L4** (0.02 mmol, 19.0 mg). Purified by flash column chromatography (petroleum ether/ethyl acetate 4:1) to afforded **3l** as a light yellow oil (52.9 mg, 46% yield, 8:1 dr); [ $\alpha$ ]<sub>D</sub><sup>20</sup> = -41.5 (c = 1.0, THF, 90% ee); **<sup>1</sup>H NMR** (400 MHz, CDCl<sub>3</sub>) δ 7.75 – 7.63 (m, 2H), 7.63 – 7.54 (m, 3H), 7.45 (s, 1H), 7.39 – 7.28 (m, 3H), 7.24 – 7.11 (m, 4H), 5.01 – 4.91 (m, 2H), 3.36 – 3.20 (m, 2H), 1.60 (s, 9H); **<sup>13</sup>C NMR** (101 MHz, CDCl<sub>3</sub>) δ 198.9, 196.1, 173.8, 153.9, 149.9, 139.3, 136.9, 135.7, 135.2, 134.5, 130.9, 130.1, 129.2, 129.1, 128.8, 128.4, 127.3, 125.5, 123.7, 121.7, 84.3, 80.7, 56.7, 44.0, 37.2, 28.4; **HRMS** (ESI): *m/z* [M + Na]<sup>+</sup> calcd for [C<sub>30</sub>H<sub>26</sub>BrNNaO<sub>6</sub>]<sup>+</sup>: 598.0836, found: 598.0837; **HPLC**: Daicel Chiralpak IF, *n*-hexane/*i*-PrOH = 70/30, flow rate = 1 mL/min, λ = 254 nm, *t*<sub>major</sub> = 18.12 min and *t*<sub>minor</sub> = 13.14 min.

***tert*-Butyl(2-((2*R*,3*R*,4*S*)-3-benzoyl-1',5-dioxo-1',3',4,5-tetrahydro-3*H*-spiro[furan-2,2'-inden]-4-yl)-4-methoxyphenyl)carbamate (3m):**

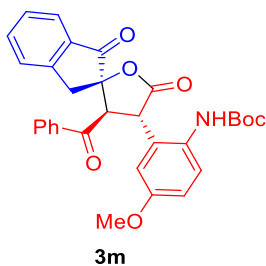

Followed the general procedure, using **1a** (0.2 mmol, 30.5 mg), **2b** (0.2 mmol, 76.8 mg) and **L4** (0.02 mmol, 19.0 mg). Purified by flash column chromatography (petroleum ether/ethyl acetate 2.5:1) to afforded **3m** as a light yellow oil (53.8 mg, 51% yield, 5:1 dr);  $[\alpha]_D^{20} = -35.6$  ( $c = 1.0$ , THF, 88% ee); **<sup>1</sup>H NMR** (400 MHz, CDCl<sub>3</sub>)  $\delta$  7.63 – 7.55 (m, 3H), 7.52 – 7.41 (m, 2H), 7.38 – 7.32 (m, 1H), 7.26 – 7.14 (m, 4H), 6.99 (s, 1H), 6.89 – 6.80 (m, 2H), 5.03 – 4.84 (m, 2H), 3.78 (s, 3H), 3.36 (dd,  $J = 56.0, 17.7$  Hz, 2H), 1.59 (s, 9H); **<sup>13</sup>C NMR** (101 MHz, CDCl<sub>3</sub>)  $\delta$  199.1, 195.7, 174.1, 157.5, 154.6, 149.9, 136.7, 135.4, 134.3, 133.8, 130.1, 129.5, 128.7, 128.7, 128.5, 128.5, 126.4, 125.0, 114.6, 85.0, 80.5, 55.8, 55.6, 45.1, 35.8, 28.4; **HRMS** (ESI):  $m/z$   $[M + Na]^+$  calcd for  $[C_{31}H_{29}NNaO_7]^+$ : 550.1836, found: 550.1841; **HPLC**: Daicel Chiralpak IF, *n*-hexane/*i*-PrOH = 70/30, flow rate = 1 mL/min,  $\lambda = 254$  nm,  $t_{major} = 12.27$  min and  $t_{minor} = 17.89$  min.

***tert*-Butyl(2-((2*R*,3*R*,4*S*)-3-benzoyl-1',5-dioxo-1',3',4,5-tetrahydro-3*H*-spiro[furan-2,2'-inden]-4-yl)-4-methylphenyl)carbamate (**3n**):**

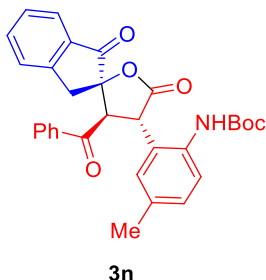

Followed the general procedure, using **1a** (0.2 mmol, 31.2 mg), **2c** (0.2 mmol, 71.5 mg) and **L4** (0.02 mmol, 19.0 mg). Purified by flash column chromatography (petroleum ether/ethyl acetate 3:1) to afforded **3n** as a light yellow oil (49.1mg, 48% yield, 7:1 dr);  $[\alpha]_D^{20} = +27.7$  ( $c = 1.0$ , THF, 96% ee); **<sup>1</sup>H NMR** (400 MHz, CDCl<sub>3</sub>)  $\delta$  7.59 (d,  $J = 7.9$  Hz, 3H), 7.54 – 7.43 (m, 2H), 7.38 – 7.29 (m, 2H), 7.25 – 7.20 (m, 2H), 7.20 – 7.14 (m, 2H), 7.13 – 7.06 (m, 2H), 5.00 – 4.86 (m, 2H), 3.35 (dd,  $J = 49.6, 17.7$  Hz, 2H), 2.31 (s, 3H), 1.59 (s, 9H); **<sup>13</sup>C NMR** (101 MHz, CDCl<sub>3</sub>)  $\delta$  199.2, 196.2, 174.2, 154.1, 150.0, 136.7, 135.4, 135.3, 134.4, 134.2, 133.8, 129.8, 129.7, 128.7, 128.5, 128.5, 127.6, 126.4, 125.8, 125.0, 84.7, 80.4, 56.7, 44.3, 35.8, 28.4, 20.9; **HRMS** (ESI):  $m/z$   $[M + Na]^+$  calcd for  $[C_{31}H_{29}NNaO_6]^+$ : 534.1887, found: 534.1883; **HPLC**: Daicel Chiralpak IF, *n*-hexane/*i*-PrOH = 80/20, flow rate = 1 mL/min,  $\lambda = 254$  nm, major product:  $t_{major} = 38.37$  min and  $t_{minor} = 24.81$  min; minor product:  $t_{major} = 15.45$  min and  $t_{minor} = 22.03$  min.

***tert*-Butyl(2-((2*R*,3*R*,4*S*)-3-benzoyl-1',5-dioxo-1',3',4,5-tetrahydro-3*H*-spiro[furan-2,2'-inden]-4-yl)-5-methoxyphenyl)carbamate (**3o**):**

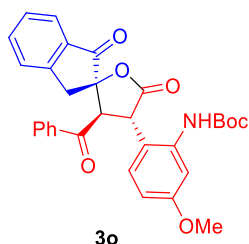

Followed the general procedure, using **1a** (0.2 mmol, 30.8 mg), **2d** (0.2 mmol, 74.9 mg) and **L4** (0.02 mmol, 19.0 mg). Purified by flash column chromatography (petroleum ether/ethyl acetate 2:1) to afforded **3o** as a light yellow oil (61.2 mg, 58% yield, 6 :1 dr);  $[\alpha]_{\text{D}}^{20} = -28.8$  ( $c = 1.0$ , THF, 95% ee); **<sup>1</sup>H NMR** (400 MHz, CDCl<sub>3</sub>)  $\delta$  7.60 (d,  $J = 8.1$  Hz, 4H), 7.52 – 7.44 (m, 1H), 7.41 – 7.31 (m, 2H), 7.26 – 7.13 (m, 5H), 6.82 – 6.68 (m, 1H), 5.03 – 4.73 (m, 2H), 3.78 (s, 3H), 3.35 (dd,  $J = 45.0, 17.7$  Hz, 2H), 1.60 (s, 9H); **<sup>13</sup>C NMR** (101 MHz, CDCl<sub>3</sub>)  $\delta$  199.3, 196.4, 174.3, 159.9, 153.6, 150.0, 138.2, 136.8, 135.2, 134.5, 133.8, 129.9, 128.7, 128.5, 126.4, 125.0, 118.4, 111.6, 84.5, 80.6, 56.8, 55.4, 43.5, 35.8, 28.4; **HRMS** (ESI):  $m/z$   $[M + Na]^+$  calcd for  $[C_{31}H_{29}NNaO_7]^+$ : 550.1836, found: 550.1834; **HPLC**: Daicel Chiralpak IC, *n*-hexane/*i*-PrOH = 70/30, flow rate = 1 mL/min,  $\lambda = 254$  nm, major product:  $t_{\text{major}} = 25.14$  min and  $t_{\text{minor}} = 35.06$  min; minor product:  $t_{\text{major}} = 21.82$  min and  $t_{\text{minor}} = 16.68$  min.

**tert-butyl(2-((2R,3R,4S)-3-(2-methylbenzoyl)-1',5-dioxo-1',3',4,5-tetrahydro-3H-spiro[furan-2,2'-inden]-4-yl)phenyl)carbamate (3p):**

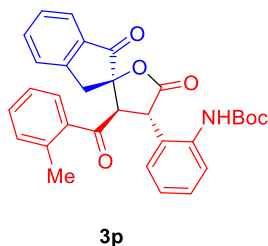

Followed the general procedure, using **1a** (0.2 mmol, 32.4 mg), **2e** (0.2 mmol, 72.6 mg) and **L4** (0.02 mmol, 19.0 mg). Purified by flash column chromatography (petroleum ether/ethyl acetate 4:1) to afforded **3p** as a white solid (76.7 mg, 75% yield, 16:1 dr);  $[\alpha]_{\text{D}}^{20} = -41.3$  ( $c = 1.0$ , THF, 98% ee); **m.p.** = 136.4-137.7 °C; **<sup>1</sup>H NMR** (400 MHz, CDCl<sub>3</sub>)  $\delta$  7.82 – 7.68 (m, 1H), 7.66 (s, 1H), 7.56 – 7.42 (m, 2H), 7.39 – 7.27 (m, 3H), 7.27 – 7.23 (m, 1H), 7.22 – 7.15 (m, 2H), 7.09 (t,  $J = 7.5$  Hz, 1H), 6.95 (t,  $J = 7.6$  Hz, 1H), 6.84 (d,  $J = 7.6$  Hz, 1H), 5.00 – 4.73 (m, 2H), 3.36 (dd,  $J = 48.6, 17.8$  Hz, 2H), 2.25 (s, 3H), 1.60 (s, 9H); **<sup>13</sup>C NMR** (101 MHz, CDCl<sub>3</sub>)  $\delta$  199.1, 198.3, 174.2, 153.9, 149.5, 138.9, 137.0, 136.5, 134.6, 133.9, 133.0, 132.0, 129.6, 129.3, 129.0, 128.5, 125.9, 125.8, 125.4, 124.7, 84.6, 80.6, 59.4, 43.9, 35.7, 28.4, 21.2; **HRMS** (ESI):  $m/z$   $[M + Na]^+$  calcd for  $[C_{31}H_{29}NNaO_6]^+$ : 534.1887, found: 534.1884; **HPLC**: Daicel Chiralpak IE, *n*-hexane/*i*-PrOH = 80/20, flow rate = 1 mL/min,  $\lambda = 254$  nm,  $t_{\text{major}} = 52.92$  min and  $t_{\text{minor}} = 40.45$  min.

**tert-Butyl(2-((2R,3R,4S)-3-(3-methoxybenzoyl)-1',5-dioxo-1',3',4,5-tetrahydro-3H-spiro[furan-2,2'-inden]-4-yl)phenyl)carbamate (3q):**

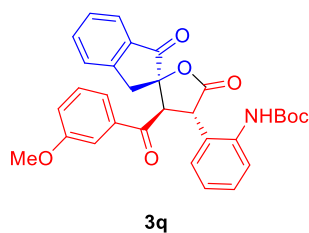

Followed the general procedure, using **1a** (0.2 mmol, 30.1 mg), **2f** (0.2 mmol, 76.4 mg) and **L4** (0.02 mmol, 19.0 mg). Purified by flash column chromatography (petroleum ether/ethyl acetate 2:1) to afforded **3q** as a light yellow oil (55.9 mg, 53% yield, 7:1 dr);  $[\alpha]_D^{20} = -34.4$  ( $c = 1.0$ , THF, 96% ee); **<sup>1</sup>H NMR** (400 MHz, CDCl<sub>3</sub>)  $\delta$  7.76 – 7.66 (m, 1H), 7.63 (d,  $J = 7.7$  Hz, 1H), 7.57 – 7.45 (m, 2H), 7.42 – 7.27 (m, 3H), 7.23 (s, 1H), 7.21 – 7.14 (m, 2H), 7.12 – 7.01 (m, 2H), 6.96 – 6.80 (m, 1H), 5.02 – 4.86 (m, 2H), 3.71 (s, 3H), 3.45 – 3.26 (m, 2H), 1.60 (s, 9H); **<sup>13</sup>C NMR** (101 MHz, CDCl<sub>3</sub>)  $\delta$  199.3, 196.0, 174.0, 159.6, 153.9, 150.1, 136.9, 136.8, 136.4, 133.8, 129.8, 129.6, 129.2, 129.0, 128.6, 127.3, 126.4, 125.4, 125.0, 121.7, 121.2, 112.0, 84.7, 80.6, 56.7, 55.4, 44.2, 36.0, 28.4; **HRMS** (ESI):  $m/z$   $[M + Na]^+$  calcd for  $[C_{31}H_{29}NNaO_7]^+$ : 550.1836, found: 550.1836; **HPLC**: Daicel Chiralpak IF, *n*-hexane/*i*-PrOH = 80/20, flow rate = 1 mL/min,  $\lambda = 254$  nm, major product:  $t_{major} = 35.93$  min and  $t_{minor} = 25.07$  min; minor product:  $t_{major} = 19.43$  min and  $t_{minor} = 23.55$  min.

***tert*-Butyl(2-((2*R*,3*R*,4*S*)-3-(4-methoxybenzoyl)-1',5-dioxo-1',3',4,5-tetrahydro-3*H*-spiro[furan-2,2'-inden]-4-yl)phenyl)carbamate (**3r**):**

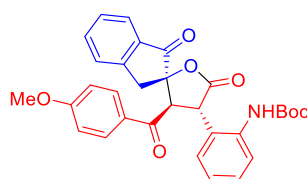

**3r**

Followed the general procedure, using **1a** (0.2 mmol, 32.2 mg), **2g** (0.2 mmol, 75.6 mg) and **L4** (0.02 mmol, 19.0 mg). Purified by flash column chromatography (petroleum ether/ethyl acetate 2:1) to afforded **3r** as a light yellow oil (65.4 mg, 62% yield, 7:1 dr);  $[\alpha]_D^{20} = -47.7$  ( $c = 1.0$ , THF, 96% ee); **<sup>1</sup>H NMR** (400 MHz, CDCl<sub>3</sub>)  $\delta$  7.77 – 7.58 (m, 5H), 7.51 (t,  $J = 7.5$  Hz, 1H), 7.41 – 7.27 (m, 3H), 7.26 – 7.21 (m, 1H), 7.15 (t,  $J = 7.5$  Hz, 1H), 6.65 (d,  $J = 8.9$  Hz, 2H), 5.01 – 4.78 (m, 2H), 3.72 (s, 3H), 3.36 (dd,  $J = 56.1, 17.8$  Hz, 2H), 1.59 (s, 9H); **<sup>13</sup>C NMR** (101 MHz, CDCl<sub>3</sub>)  $\delta$  199.4, 194.0, 174.2, 164.7, 153.8, 150.4, 137.0, 136.8, 133.8, 131.2, 129.1, 128.9, 128.4, 128.1, 126.5, 125.2, 125.1, 114.0, 84.8, 80.5, 56.1, 55.6, 44.2, 35.9, 28.4; **HRMS** (ESI):  $m/z$   $[M + Na]^+$  calcd for  $[C_{31}H_{29}NNaO_7]^+$ : 550.1836, found: 550.1839; **HPLC**: Daicel Chiralpak IF, *n*-hexane/*i*-PrOH = 80/20, flow rate = 1 mL/min,  $\lambda = 254$  nm, major product:  $t_{major} = 40.97$  min and  $t_{minor} = 31.13$  min; minor product:  $t_{major} = 25.51$  min and  $t_{minor} = 33.82$  min.

***tert*-Butyl(2-((2*R*,3*R*,4*S*)-3-(4-methylbenzoyl)-1',5-dioxo-1',3',4,5-tetrahydro-3*H*-spiro[furan-2,2'-inden]-4-yl)phenyl)carbamate (**3s**):**

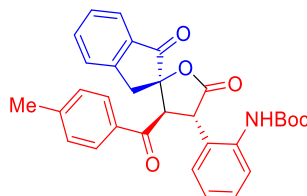

**3s**

Followed the general procedure, using **1a** (0.2 mmol, 30.5 mg), **2h** (0.2 mmol, 73.9 mg) and **L4** (0.02 mmol, 19.0 mg). Purified by flash column chromatography (petroleum ether/ethyl acetate 3:1) to afforded **3s** as a light yellow oil (49.1 mg, 48% yield, 6:1 dr);  $[\alpha]_D^{20} = -33.7$  ( $c = 1.0$ , THF, 95% ee); **<sup>1</sup>H NMR** (400 MHz, CDCl<sub>3</sub>)  $\delta$  7.76 – 7.67 (m, 1H), 7.63 (d,  $J = 7.7$  Hz, 1H), 7.58 (s, 1H), 7.55 – 7.46 (m, 3H), 7.37 – 7.28 (m, 2H), 7.27 – 7.20 (m, 2H), 7.15 (t,  $J = 7.7$  Hz, 1H), 6.97 (d,  $J = 8.1$  Hz, 2H), 5.01 – 4.84 (m, 2H), 3.35 (dd,  $J = 46.4, 17.8$  Hz, 2H), 2.22 (s, 3H), 1.59 (s, 9H); **<sup>13</sup>C NMR** (101 MHz, CDCl<sub>3</sub>)

$\delta$  199.3, 195.6, 174.1, 153.8, 150.2, 145.9, 137.0, 136.8, 133.8, 132.7, 129.4, 129.1, 128.9, 128.7, 128.6, 128.4, 127.0, 126.4, 125.3, 125.1, 84.8, 80.5, 56.3, 44.2, 35.9, 28.4, 21.6; **HRMS** (ESI):  $m/z$   $[M + Na]^+$  calcd for  $[C_{31}H_{29}NNaO_6]^+$ : 534.1887, found: 534.1882; **HPLC**: Daicel Chiralpak IF, *n*-hexane/*i*-PrOH = 80/20, flow rate = 1 mL/min,  $\lambda$  = 254 nm, major product:  $t_{major}$  = 33.88 min and  $t_{minor}$  = 24.33 min; minor product:  $t_{major}$  = 21.60 min and  $t_{minor}$  = 26.31 min.

***tert*-Butyl(2-((2*R*,3*R*,4*S*)-3-(4-fluorobenzoyl)-1',5-dioxo-1',3',4,5-tetrahydro-3*H*-spiro[furan-2,2'-inden]-4-yl)phenyl)carbamate (3t):**

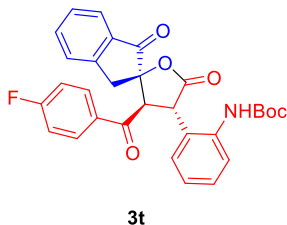

Followed the general procedure, using **1a** (0.2 mmol, 28.9 mg), **2i** (0.2 mmol, 74.1 mg) and **L4** (0.02 mmol, 19.0 mg). Purified by flash column chromatography (petroleum ether/ethyl acetate 4:1) to afforded **3t** as a light yellow oil (51.5 mg, 50% yield, 5:1 dr);  $[\alpha]_D^{20}$  = -49.3 ( $c$  = 1.0, THF, 93% ee); **<sup>1</sup>H NMR** (400 MHz,  $CDCl_3$ )  $\delta$  7.73 – 7.58 (m, 4H), 7.57 – 7.48 (m, 1H), 7.38 (s, 1H), 7.35 – 7.27 (m, 3H), 7.26 – 7.21 (m, 1H), 7.17 (t,  $J$  = 8.0 Hz, 1H), 6.86 (t,  $J$  = 8.5 Hz, 2H), 4.93 (s, 2H), 3.37 (dd,  $J$  = 41.5, 17.7 Hz, 2H), 1.60 (s, 9H); **<sup>13</sup>C NMR** (101 MHz,  $CDCl_3$ )  $\delta$  199.1, 194.4, 173.9, 166.4 (d,  $J$  = 258.5 Hz), 154.0, 145.0, 137.0, 136.9, 133.7, 131.7, 131.7, 131.5, 131.4, 129.3, 129.1, 128.6, 127.4, 126.4, 125.6, 125.1, 116.1, 115.9, 84.7, 80.7, 56.3, 44.5, 35.8, 28.4; **<sup>19</sup>F NMR** (376 MHz,  $CDCl_3$ )  $\delta$  -101.6; **HRMS** (ESI):  $m/z$   $[M + Na]^+$  calcd for  $[C_{30}H_{26}FNNaO_6]^+$ : 538.1636, found: 538.1633; **HPLC**: Daicel Chiralpak IE, *n*-hexane/*i*-PrOH = 80/20, flow rate = 1 mL/min,  $\lambda$  = 254 nm, major product:  $t_{major}$  = 35.97 min and  $t_{minor}$  = 30.34 min; minor product:  $t_{major}$  = 21.17 min and  $t_{minor}$  = 32.06 min.

***tert*-Butyl(2-((2*R*,3*R*,4*S*)-3-(4-chlorobenzoyl)-1',5-dioxo-1',3',4,5-tetrahydro-3*H*-spiro[furan-2,2'-inden]-4-yl)phenyl)carbamate (3u):**

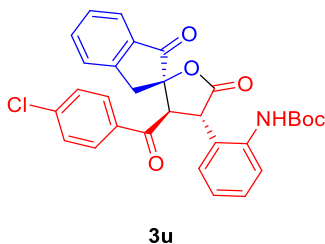

Followed the general procedure, using **1a** (0.2 mmol, 29.5 mg), **2j** (0.2 mmol, 77.3 mg) and **L4** (0.02 mmol, 19.0 mg). Purified by flash column chromatography (petroleum ether/ethyl acetate 4:1) to afforded **3u** as a light yellow oil (58.4 mg, 55% yield, 6:1 dr);  $[\alpha]_D^{20}$  = -29.1 ( $c$  = 1.0, THF, 90 % ee); **<sup>1</sup>H NMR** (400 MHz,  $CDCl_3$ )  $\delta$  7.73 – 7.60 (m, 2H), 7.58 – 7.50 (m, 3H), 7.36 – 7.27 (m, 4H), 7.26 – 7.22 (m, 1H), 7.20 – 7.09 (m, 3H), 4.92 (s, 2H), 3.36 (dd,  $J$  = 16.0 Hz, 2H), 1.60 (s, 9H); **<sup>13</sup>C NMR** (101 MHz,  $CDCl_3$ )  $\delta$  199.0, 194.9, 173.9, 154.0, 149.9, 141.2, 137.0, 136.8, 133.7, 133.6, 129.9, 129.3, 129.1, 129.1, 128.6, 127.5, 126.4, 125.9, 125.7, 125.1, 84.7, 80.7, 56.3, 44.6, 35.8, 28.4; **HRMS** (ESI):  $m/z$   $[M + Na]^+$  calcd for  $[C_{30}H_{26}ClNNaO_6]^+$ : 554.1341, found: 554.1343; **HPLC**: Daicel Chiralpak IE, *n*-hexane/*i*-PrOH = 80/20, flow rate = 1 mL/min,  $\lambda$  = 254 nm, major product:  $t_{major}$  = 36.25 min and  $t_{minor}$  = 29.07 min; minor product:  $t_{major}$  = 20.69 min and  $t_{minor}$  = 31.57 min.

***tert*-Butyl(2-((2*R*,3*R*,4*S*)-1',5-dioxo-3-(thiophene-2-carbonyl)-1',3',4,5-tetrahydro-3*H*-spiro[furan-2,2'-inden]-4-yl)phenyl)carbamate (**3v**):**

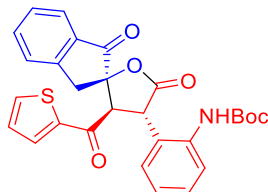

**3v**

Followed the general procedure, using **1a** (0.2 mmol, 30.6 mg), **2k** (0.2 mmol, 71.8 mg) and **L4** (0.02 mmol, 19.0 mg). Purified by flash column chromatography (petroleum ether/ethyl acetate 3:1) to afforded **3v** as a light yellow oil (60.4 mg, 60% yield, 11:1 dr);  $[\alpha]_D^{20} = -29.8$  ( $c = 1.0$ , THF, 91% ee); **<sup>1</sup>H NMR** (400 MHz, CDCl<sub>3</sub>)  $\delta$  7.72 (d,  $J = 7.7$  Hz, 1H), 7.70 – 7.62 (m, 1H), 7.60 – 7.51 (m, 2H), 7.45 (d,  $J = 3.4$  Hz, 1H), 7.40 – 7.27 (m, 5H), 7.22 – 7.09 (m, 1H), 6.93 – 6.81 (m, 1H), 5.02 – 4.67 (m, 2H), 3.45 (dd,  $J = 78.3, 17.8$  Hz, 2H), 1.59 (s, 9H); **<sup>13</sup>C NMR** (101 MHz, CDCl<sub>3</sub>)  $\delta$  199.1, 187.6, 173.8, 153.9, 150.4, 142.4, 137.0, 137.0, 136.9, 134.7, 133.7, 129.1, 129.0, 128.7, 128.6, 127.0, 126.6, 125.5, 125.1, 84.9, 80.6, 57.0, 44.2, 35.9, 28.4; **HRMS** (ESI):  $m/z$   $[M + Na]^+$  calcd for [C<sub>28</sub>H<sub>25</sub>NNaO<sub>6</sub>S]<sup>+</sup>: 526.1295, found: 526.1298; **HPLC**: Daicel Chiralpak IF, *n*-hexane/*i*-PrOH = 70/30, flow rate = 1 mL/min,  $\lambda = 254$  nm, major product:  $t_{major} = 21.57$  min and  $t_{minor} = 17.36$  min; minor product:  $t_{major} = 15.40$  min and  $t_{minor} = 18.07$  min.

***tert*-Butyl(2-((2*R*,3*R*,4*S*)-3-(2-naphthoyl)-1',5-dioxo-1',3',4,5-tetrahydro-3*H*-spiro[furan-2,2'-inden]-4-yl)phenyl)carbamate (**3w**):**

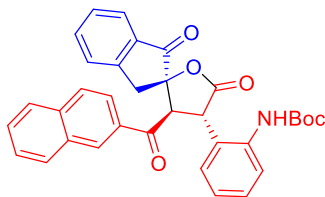

**3w**

Followed the general procedure, using **1a** (0.2 mmol, 31.1 mg), **2l** (0.2 mmol, 80.6 mg) and **L4** (0.02 mmol, 19.0 mg). Purified by flash column chromatography (petroleum ether/ethyl acetate 3:1) to afforded **3w** as a light yellow oil (71.1 mg, 65% yield, 9:1 dr);  $[\alpha]_D^{20} = -28.3$  ( $c = 1.0$ , THF, 93% ee); **<sup>1</sup>H NMR** (400 MHz, CDCl<sub>3</sub>)  $\delta$  8.09 (s, 1H), 7.78 (d,  $J = 8.1$  Hz, 1H), 7.74 – 7.64 (m, 3H), 7.60 (d,  $J = 8.7$  Hz, 1H), 7.58 – 7.51 (m, 2H), 7.51 – 7.44 (m, 2H), 7.41 – 7.28 (m, 3H), 7.22 – 7.11 (m, 2H), 7.00 (t,  $J = 7.5$  Hz, 1H), 5.17 – 4.77 (m, 2H), 3.37 (dd,  $J = 48.5, 17.7$  Hz, 2H), 1.62 (s, 9H); **<sup>13</sup>C NMR** (101 MHz, CDCl<sub>3</sub>)  $\delta$  199.4, 195.9, 174.2, 154.0, 150.0, 137.0, 136.6, 135.8, 133.8, 132.4, 131.9, 131.5, 129.7, 129.5, 129.3, 129.0, 128.8, 128.3, 127.6, 127.1, 126.2, 125.5, 124.7, 123.2, 84.9, 80.6, 56.6, 44.3, 36.0, 28.5; **HRMS** (ESI):  $m/z$   $[M + Na]^+$  calcd for [C<sub>34</sub>H<sub>29</sub>NNaO<sub>6</sub>]<sup>+</sup>: 570.1887, found: 570.1892; **HPLC**: Daicel Chiralpak IE, *n*-hexane/*i*-PrOH = 70/30, flow rate = 1 mL/min,  $\lambda = 254$  nm, major product:  $t_{major} = 35.56$  min and  $t_{minor} = 28.23$  min; minor product:  $t_{major} = 21.55$  min and  $t_{minor} = 31.18$  min.

## Mmol-scale reaction

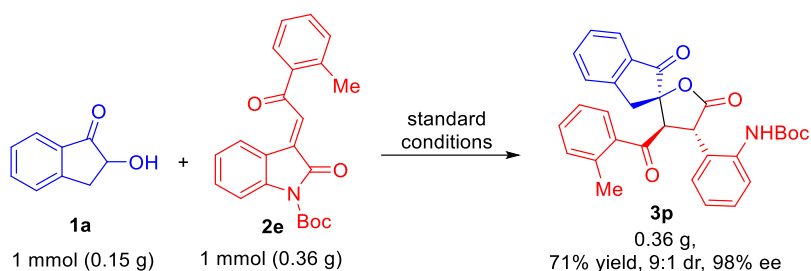

Under a nitrogen atmosphere, a solution of diethylzinc (200  $\mu\text{L}$ , 1.0 M in hexane, 0.2 mmol) was added dropwise to a solution of **L4** (0.1 mmol, 90 mg) in THF (5 mL). After the mixture was stirred for 30 min at room temperature. Then,  $\alpha$ -hydroxy-1-indanone **1a** (1.0 mmol, 0.15 g), methyleneindolinone **2e** (1.0 mmol, 0.36 g) and 2-Br-4-ClPhOH (2.0 eq, 0.41 g) were added. The reaction mixture was stirred for 24 h at the same temperature. The reaction was quenched with  $\text{NH}_4\text{Cl}$  solution (10 mL), and the organic layer was extracted with  $\text{CH}_2\text{Cl}_2$  ( $3 \times 5$  mL). The combined organic layer was washed with brine and dried over  $\text{Na}_2\text{SO}_4$ . The solvent was removed under reduced pressure by using a rotary evaporator. The residue was purified by flash chromatography with petroleum ether/ethyl acetate (5/1) to afford the desired product **3p** (0.36g) as a white solid.

## Derivatization

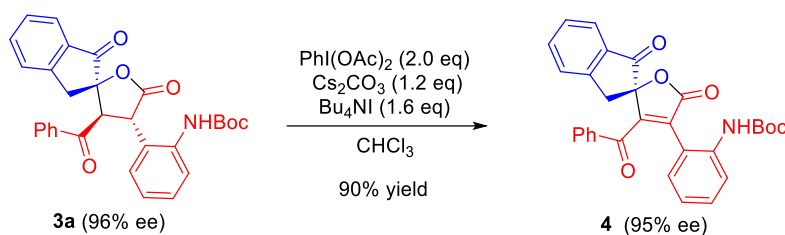

Synthesis of **4**<sup>3</sup>: The mixture of **3a** (50.0 mg, 0.1 mmol, 1.0 equiv),  $\text{PhI(OAc)}_2$  (65.0 mg, 0.2 mmol, 2.0 equiv), and  $\text{Cs}_2\text{CO}_3$  (39.5 mg, 0.12 mmol, 1.2 equiv) in  $\text{CHCl}_3$  (2 mL) was treated with  $\text{Bu}_4\text{NI}$  (59.0 mg, 0.16 mmol, 1.6 equiv) at 0  $^\circ\text{C}$ . The reaction was allowed to stir at same temperature for 48 h. Upon completion as shown by TLC, the reaction mixture was washed with saturated  $\text{Na}_2\text{S}_2\text{O}_3$  (1 mL) and extracted using dichloromethane ( $3 \times 1$  mL). The organic layer was dried over  $\text{Na}_2\text{SO}_4$  and concentrated in vacuo. The residue was purified by flash chromatography with petroleum ether/ethyl acetate (5/1) to provide the product **4** as a light yellow oil.

**tert-Butyl (R)-(2-(3-benzoyl-1',5-dioxo-1',3'-dihydro-5H-spiro[furan-2,2'-inden]-4-yl)phenyl)carbamate (4):**

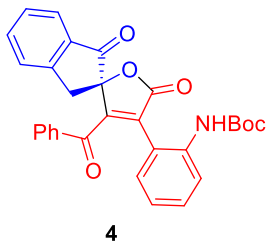

Light yellow oil (44.6 mg) in 90% isolated yield;  $[\alpha]_{\text{D}}^{20} = -20.2$  ( $c = 1.0$ , THF, 95% ee);  $^1\text{H NMR}$  (400 MHz,  $\text{CDCl}_3$ )  $\delta$  7.84 (d,  $J = 7.7$  Hz, 1H), 7.70 – 7.60 (m, 1H), 7.49 (d,  $J = 8.2$  Hz, 1H), 7.47 – 7.39 (m, 4H), 7.32 – 7.25 (m, 1H), 7.16 – 7.04 (m, 4H), 6.98 (s, 1H), 6.90 – 6.80 (m, 1H), 3.84 – 3.56 (m, 2H), 1.47 (s, 9H);  $^{13}\text{C NMR}$  (101 MHz,  $\text{CDCl}_3$ )  $\delta$  195.4, 190.2, 171.0, 155.0, 153.0, 150.8, 136.7, 136.6, 134.5, 133.9, 133.6, 131.0, 130.7, 129.3, 128.6, 128.5, 126.7, 125.9, 124.0, 123.4, 120.8, 90.0, 80.5, 35.0, 28.3; **HRMS** (ESI):  $m/z$   $[\text{M} + \text{Na}]^+$  calcd for  $[\text{C}_{30}\text{H}_{25}\text{NNaO}_6]^+$ : 518.1574, found: 518.1578; **HPLC**:

Daicel Chiralpak IC, *n*-hexane/*i*-PrOH = 80/20, flow rate = 1 mL/min,  $\lambda$  = 254 nm,  $t_{\text{major}}$  = 20.10 min and  $t_{\text{minor}}$  = 17.88 min.

## Further applications

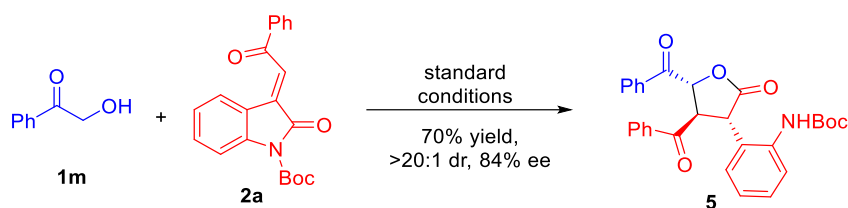

Under a nitrogen atmosphere, a solution of diethylzinc (40  $\mu$ L, 1.0 M in hexane, 0.04 mmol) was added dropwise to a solution of **L4** (0.02 mmol, 19.0 mg) in THF (2 mL). After the mixture was stirred for 30 min at 20 °C. Then,  $\alpha$ -hydroxyacetophenone **1m** (0.2 mmol, 27.5 mg), methyleneindolinone **2** (0.2 mmol, 69.8 mg) and 2-Br-4-ClPhOH (2.0 eq, 83.0 mg) were added. The reaction mixture was stirred for 24 h at the same temperature. The reaction mixture was quenched with  $\text{NH}_4\text{Cl}$  solution (4 mL), and the organic layer was extracted with  $\text{CH}_2\text{Cl}_2$  (3  $\times$  5 mL). The combined organic layer was washed with brine and dried over  $\text{Na}_2\text{SO}_4$ . The solvent was removed under reduced pressure by using a rotary evaporator. The residue was purified by flash chromatography with petroleum ether/ethyl acetate (5/1) to afford the desired product **5**.

**tert-Butyl (2-((3*S*,4*R*,5*R*)-4,5-dibenzoyl-2-oxotetrahydrofuran-3-yl)phenyl)carbamate (**5**):**

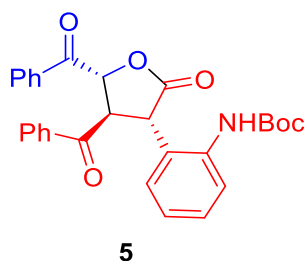

Light yellow oil (67.9 mg, >20:1dr) in 70% isolated yield;  $[\alpha]_{\text{D}}^{20}$  = -4.2 ( $c$  = 1.0, THF, 84% ee);  **$^1\text{H}$  NMR** (400 MHz,  $\text{CDCl}_3$ )  $\delta$  7.74 – 7.60 (m, 5H), 7.53 (s, 1H), 7.50 – 7.42 (m, 2H), 7.35 – 7.28 (m, 3H), 7.27 – 7.22 (m, 2H), 7.21 – 7.16 (m, 1H), 7.16 – 7.10 (m, 1H), 6.25 (d,  $J$  = 8.5 Hz, 1H), 5.01 – 4.86 (m, 1H), 4.77 (d,  $J$  = 10.4 Hz, 1H), 1.57 (s, 9H);  **$^{13}\text{C}$  NMR** (101 MHz,  $\text{CDCl}_3$ )  $\delta$  195.0, 193.7, 175.3, 154.2, 136.8, 135.9, 134.3, 134.3, 134.1, 129.0, 129.0, 128.9, 128.8, 128.6, 128.2, 126.2, 125.7, 80.6, 76.6, 55.6, 43.0, 28.4; **HRMS** (ESI):  $m/z$   $[\text{M} + \text{Na}]^+$  calcd for  $[\text{C}_{29}\text{H}_{27}\text{NNaO}_6]^+$ : 508.1731, found: 508.1736; **HPLC**: Daicel Chiralpak AD, *n*-hexane/*i*-PrOH = 80/20, flow rate = 1 mL/min,  $\lambda$  = 254 nm,  $t_{\text{major}}$  = 21.03 min and  $t_{\text{minor}}$  = 42.17 min.

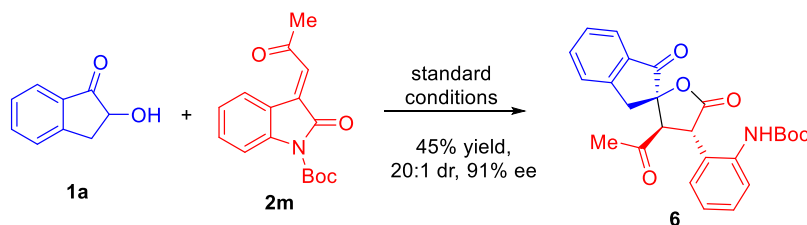

Under a nitrogen atmosphere, a solution of diethylzinc (40  $\mu$ L, 1.0 M in hexane, 0.04 mmol) was added dropwise to a solution of **L4** (0.02 mmol, 19.0 mg) in THF (2 mL). After the mixture was stirred for 30 min at 20 °C. Then,  $\alpha$ -hydroxyacetophenone **1a** (0.2 mmol, 31.1 mg), methyleneindolinone **2m** (0.2 mmol, 57.8 mg) and 2-Br-4-ClPhOH (2.0 eq, 83.0 mg) were added. The reaction mixture was stirred for

24 h at the same temperature. The reaction was quenched with NH<sub>4</sub>Cl solution (4 mL), and the organic layer was extracted with CH<sub>2</sub>Cl<sub>2</sub> (3 × 5 mL). The combined organic layer was washed with brine and dried over Na<sub>2</sub>SO<sub>4</sub>. The solvent was removed under reduced pressure by using a rotary evaporator. The residue was purified by flash chromatography with petroleum ether/ethyl acetate (5/1) to afford the desired product **6**.

**tert-butyl(2-(3-acetyl-1',5-dioxo-1',3',4,5-tetrahydro-3*H*-spiro[furan-2,2'-inden]-4-yl)phenyl)carbamate (**6**):**

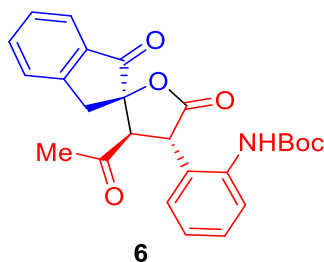

Light yellow oil (39.2 mg, >20:1dr) in 45% isolated yield;  $[\alpha]_D^{20} = -26.0$  ( $c = 1.0$ , THF, 91% ee); **<sup>1</sup>H NMR** (400 MHz, CDCl<sub>3</sub>)  $\delta$  7.85 (d,  $J = 7.7$  Hz, 1H), 7.71 – 7.57 (m, 2H), 7.50 – 7.38 (m, 3H), 7.27 – 7.20 (m, 1H), 7.17 – 7.05 (m, 2H), 4.56 (d,  $J = 12.0$  Hz, 1H), 4.12 (d,  $J = 12.0$  Hz, 1H), 3.39 – 3.23 (m, 2H), 1.66 (s, 3H), 1.49 (s, 9H); **<sup>13</sup>C NMR** (101 MHz, CDCl<sub>3</sub>)  $\delta$  204.0, 198.6, 173.7, 153.8, 150.3, 137.4, 136.9, 133.6, 129.1, 129.0, 129.0, 127.1, 126.9, 125.5, 125.4, 83.7, 80.6, 62.0, 43.4, 36.1, 30.4, 28.4; **HRMS** (ESI):  $m/z$   $[M + Na]^+$  calcd for  $[C_{25}H_{25}NNaO_6]^+$ : 458.1574, found: 458.1579; **HPLC**: Daicel Chiralpak IF, *n*-hexane/*i*-PrOH = 70/30, flow rate = 1 mL/min,  $\lambda = 254$  nm,  $t_{major} = 21.08$  min and  $t_{minor} = 10.35$  min.

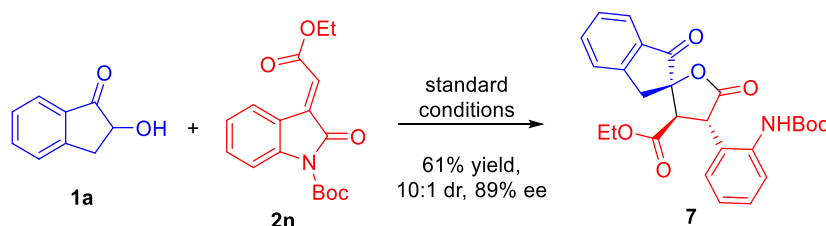

Under a nitrogen atmosphere, a solution of diethylzinc (40  $\mu$ L, 1.0 M in hexane, 0.04 mmol) was added dropwise to a solution of **L4** (0.02 mmol, 19.0 mg) in THF (2 mL). After the mixture was stirred for 30 min at 20 °C. Then,  $\alpha$ -hydroxyacetophenone **1a** (0.2 mmol, 31.1 mg), methyleneindolinone **2n** (0.2 mmol, 63.4 mg) and 2-Br-4-ClPhOH (2.0 eq, 83.0 mg) were added. The reaction mixture was stirred for 24 h at the same temperature. The reaction was quenched with NH<sub>4</sub>Cl solution (4 mL), and the organic layer was extracted with CH<sub>2</sub>Cl<sub>2</sub> (3 × 5 mL). The combined organic layer was washed with brine and dried over Na<sub>2</sub>SO<sub>4</sub>. The solvent was removed under reduced pressure by using a rotary evaporator. The residue was purified by flash chromatography with petroleum ether/ethyl acetate (5/1) to afford the desired product **7**.

**ethyl 4-(2-((*tert*-butoxycarbonyl)amino)phenyl)-1',5-dioxo-1',3',4,5-tetrahydro-3*H*-spiro[furan-2,2'-indene]-3-carboxylate (**7**):**

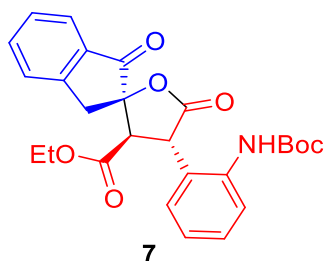

Light yellow oil (55.8 mg, 10:1dr) in 61% isolated yield;  $[\alpha]_{\text{D}}^{20} = -42.6$  ( $c = 1.0$ , THF, 89% ee);  $^1\text{H NMR}$  (400 MHz,  $\text{CDCl}_3$ )  $\delta$  7.89 (d,  $J = 7.7$  Hz, 1H), 7.76 – 7.65 (m, 3H), 7.53 – 7.42 (m, 2H), 7.38 – 7.29 (m, 1H), 7.27 – 7.15 (m, 2H), 4.62 (d,  $J = 12.3$  Hz, 1H), 3.94 (d,  $J = 12.3$  Hz, 1H), 3.90 – 3.74 (m, 2H), 3.54 – 3.36 (m, 2H), 1.56 (s, 9H), 0.62 (t,  $J = 7.1$  Hz, 3H);  $^{13}\text{C NMR}$  (101 MHz,  $\text{CDCl}_3$ )  $\delta$  198.5, 173.5, 169.4, 153.7, 150.2, 137.1, 136.8, 134.1, 128.9, 128.8, 128.7, 127.0, 126.4, 125.3, 125.1, 83.6, 80.5, 62.2, 55.8, 43.5, 36.5, 28.4, 13.1; **HRMS** (ESI):  $m/z$   $[\text{M} + \text{Na}]^+$  calcd for  $[\text{C}_{26}\text{H}_{27}\text{NNaO}_7]^+$ : 488.1680, found: 488.1691; **HPLC**: Daicel Chiralpak IF,  $n$ -hexane/ $i$ -PrOH = 70/30, flow rate = 1 mL/min,  $\lambda = 254$  nm, major product:  $t_{\text{major}} = 21.30$  min and  $t_{\text{minor}} = 11.35$  min; minor product:  $t_{\text{major}} = 10.32$  min and  $t_{\text{minor}} = 12.68$  min.

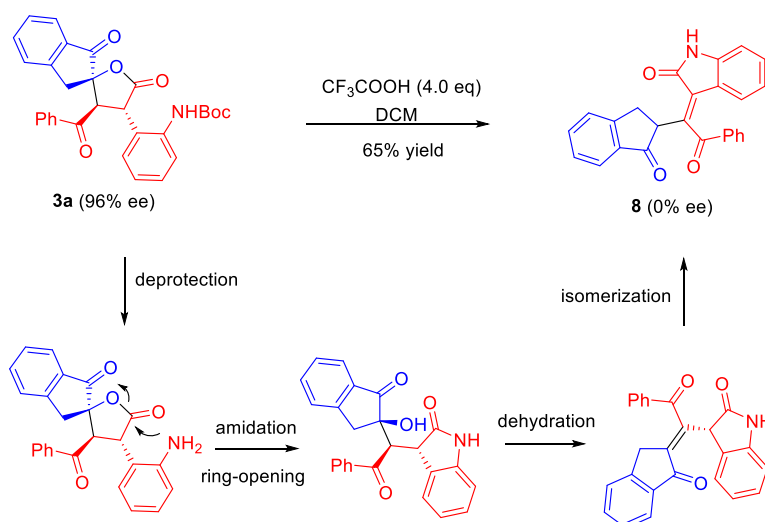

**Synthesis of 8:** The mixture of **3a** (50.0 mg, 0.1 mmol, 1.0 equiv) in DCM (2 mL) was treated with  $\text{CF}_3\text{COOH}$  (45.5 mg, 0.4 mmol, 4.0 equiv). The reaction was allowed to stir at rt for 24 h. Upon completion as shown by TLC, the reaction mixture was washed with saturated  $\text{NaHCO}_3$  (1 mL) and extracted using dichloromethane (3 x 1 mL). The organic layer was dried over  $\text{Na}_2\text{SO}_4$  and concentrated in vacuo. The residue was purified by flash chromatography with petroleum ether/ethyl acetate (10/1) to provide the product **8** as a colourless oil.

**(E)-3-(2-oxo-1-(1-oxo-2,3-dihydro-1H-inden-2-yl)-2-phenylethylidene)indolin-2-one (8):**

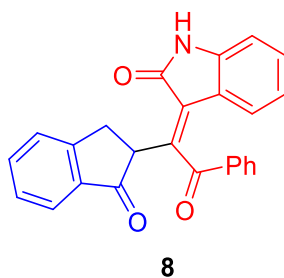

Colourless oil (25.0 mg) in 60% isolated yield;  $^1\text{H NMR}$  (400 MHz,  $\text{CDCl}_3$ )  $\delta$  8.15 (d,  $J = 8.4$  Hz, 1H),

7.87 (s, 1H), 7.84 (d,  $J = 7.6$  Hz, 1H), 7.75 – 7.55 (m, 5H), 7.53 – 7.32 (m, 6H), 4.40 – 4.14 (m, 1H), 3.73 – 3.46 (m, 1H), 3.29 – 3.08 (m, 1H);  $^{13}\text{C}$  NMR (101 MHz,  $\text{CDCl}_3$ )  $\delta$  206.3, 160.9, 153.2, 146.7, 140.4, 136.4, 135.3, 135.0, 132.6, 129.6, 129.4, 129.3, 128.5, 128.4, 128.0, 127.6, 127.2, 126.7, 126.4, 124.4, 50.2, 37.7; HRMS (ESI):  $m/z$   $[\text{M} + \text{H}]^+$  calcd for  $[\text{C}_{25}\text{H}_{18}\text{NO}_3]^+$ : 380.1281, found: 380.1284.

## References

1. K. Matsuo and M. Shindo, *Org. Lett.*, 2010, **12**, 5346–5349.
2. J. Guo, Y. Liu, X. Li, X. Liu, L. Lin and X. Feng, *Chem. Sci.*, 2016, **7**, 2717–2721.
3. V. S. Raut, M. Jean, N. Vanthuyne, C. Roussel, T. Constantieux, C. Bressy, X. Bugaut, D. Bonne and J. Rodriguez, *J. Am. Chem. Soc.*, 2017, **139**, 2140–2143.

## NMR Spectra of compounds

<sup>1</sup>H NMR (400 MHz, CDCl<sub>3</sub>)

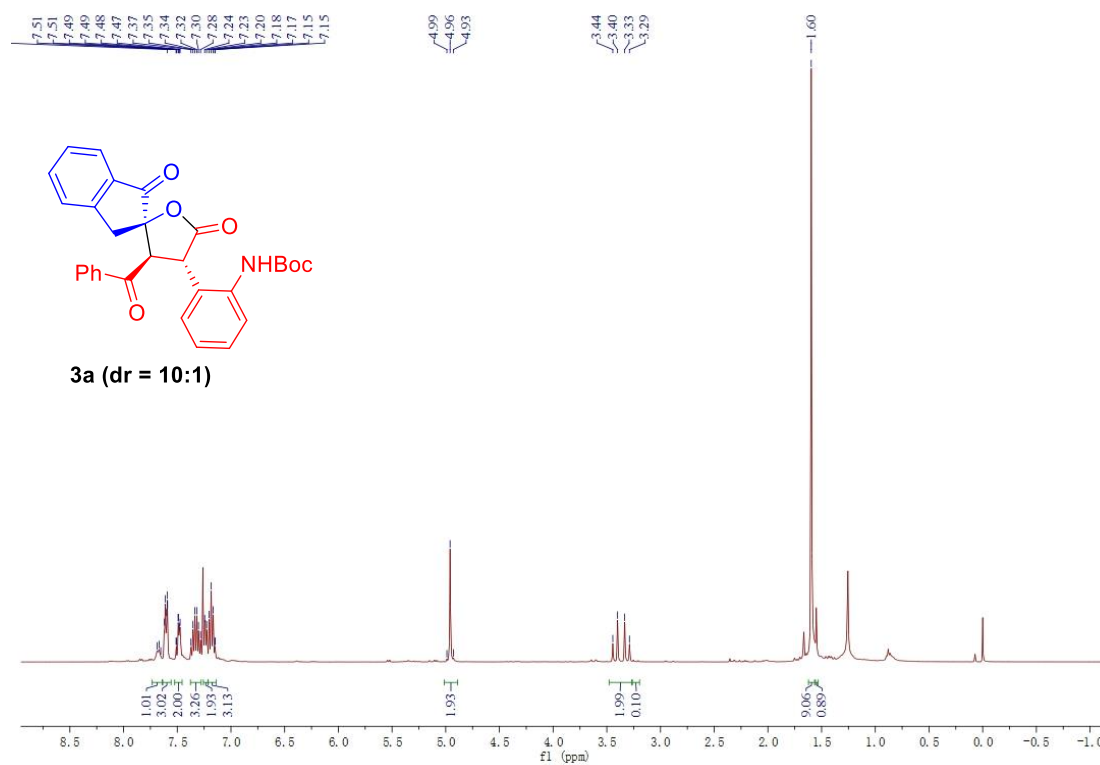

<sup>13</sup>C NMR (101 MHz, CDCl<sub>3</sub>)

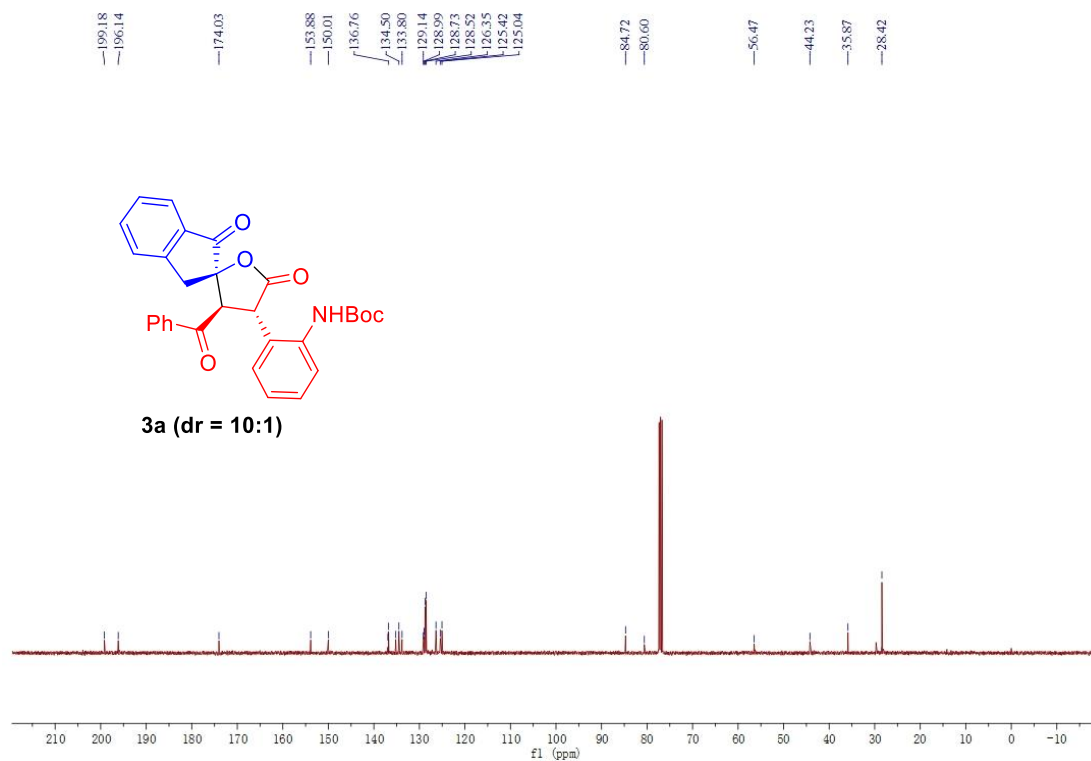

**<sup>1</sup>H NMR (400 MHz, CDCl<sub>3</sub>)**

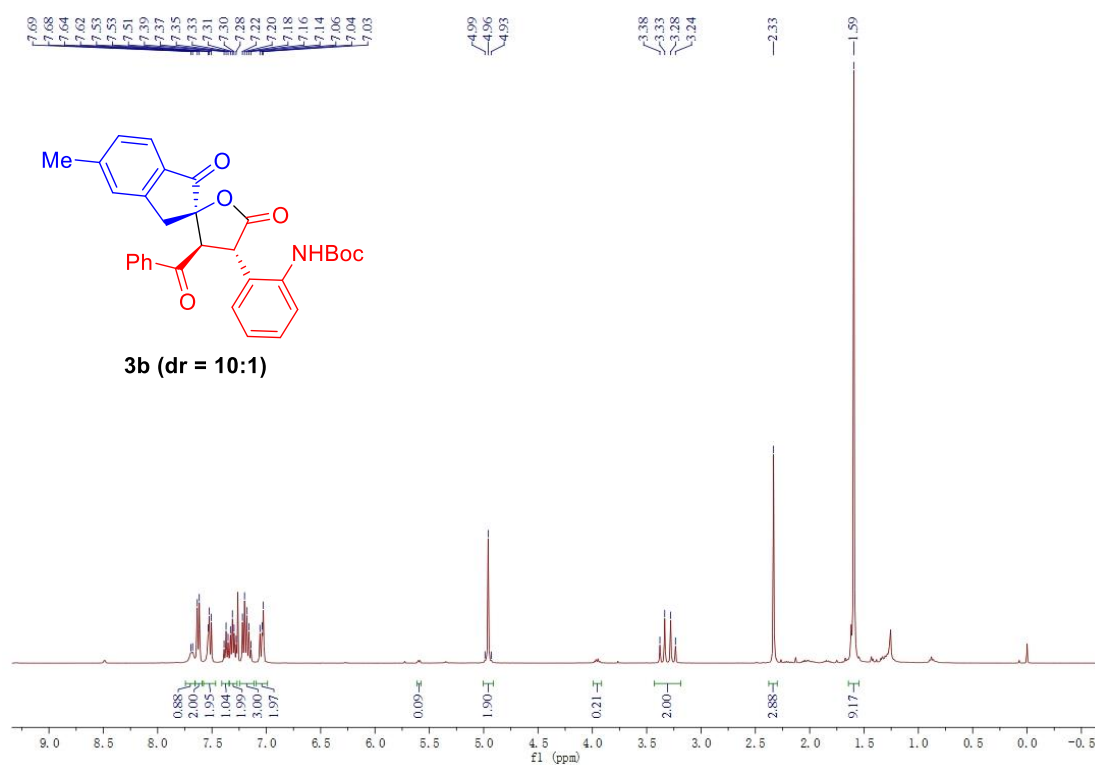

**<sup>13</sup>C NMR (101 MHz, CDCl<sub>3</sub>)**

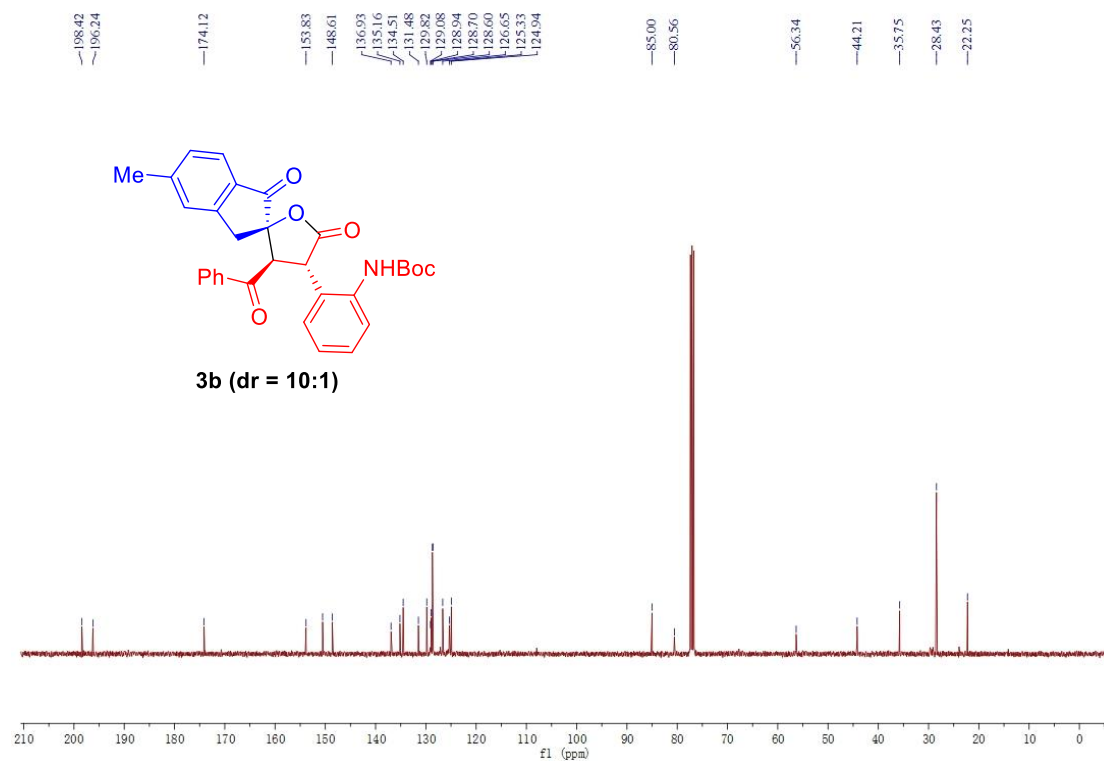

**<sup>1</sup>H NMR (400 MHz, CDCl<sub>3</sub>)**

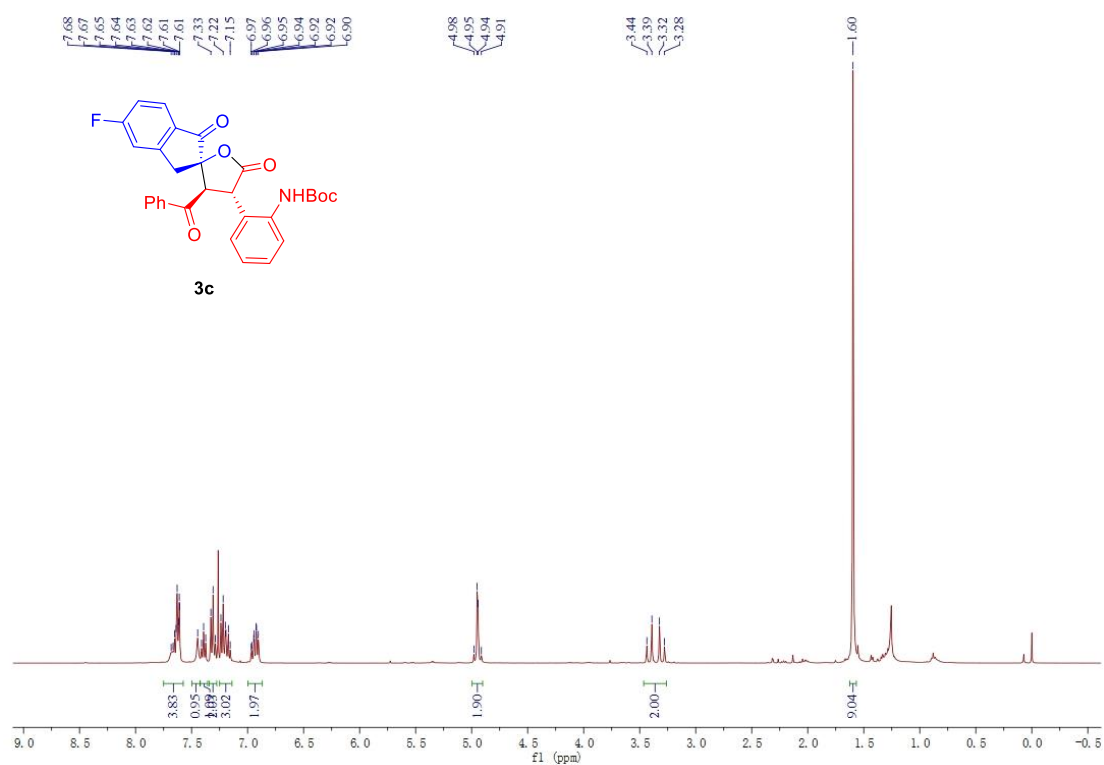

**<sup>13</sup>C NMR (101 MHz, CDCl<sub>3</sub>)**

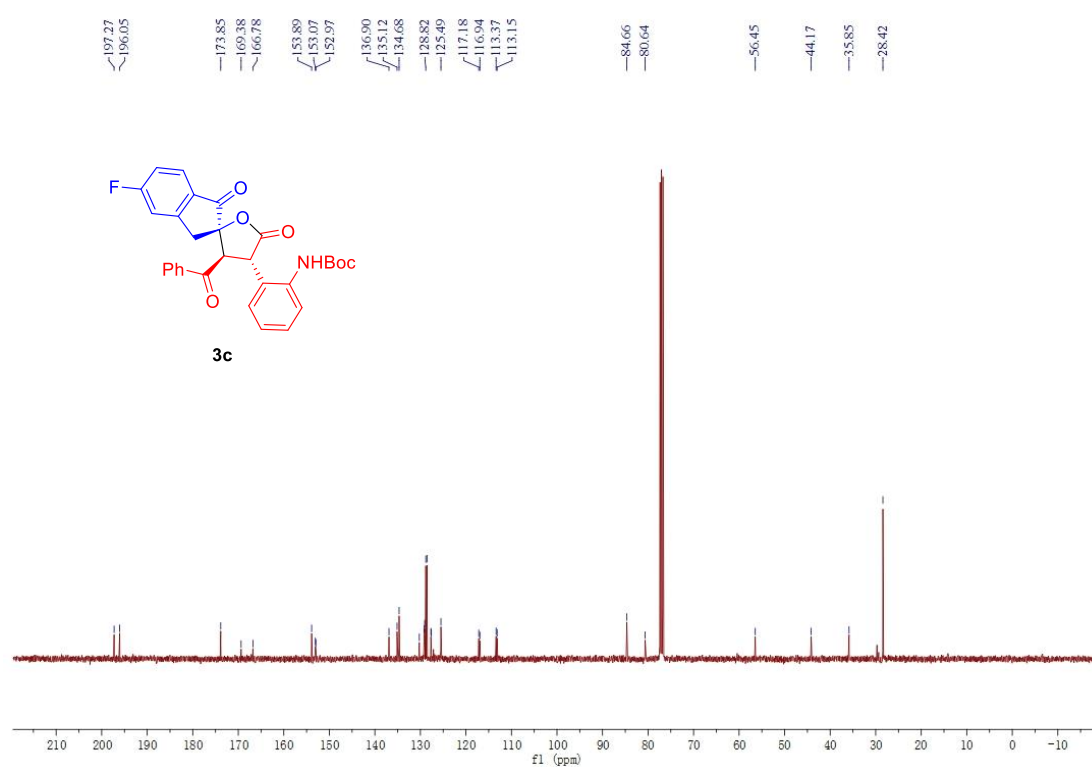

**$^{19}\text{F}$  NMR (376 MHz,  $\text{CDCl}_3$ )**

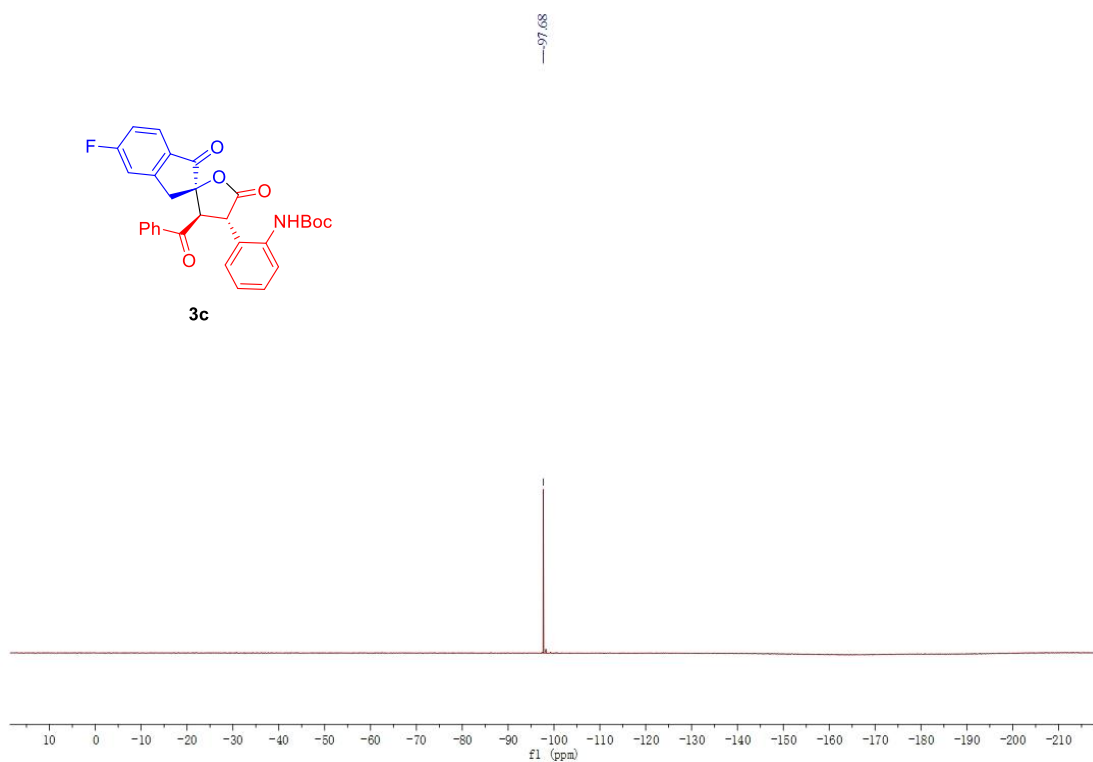

**$^1\text{H}$  NMR (400 MHz,  $\text{CDCl}_3$ )**

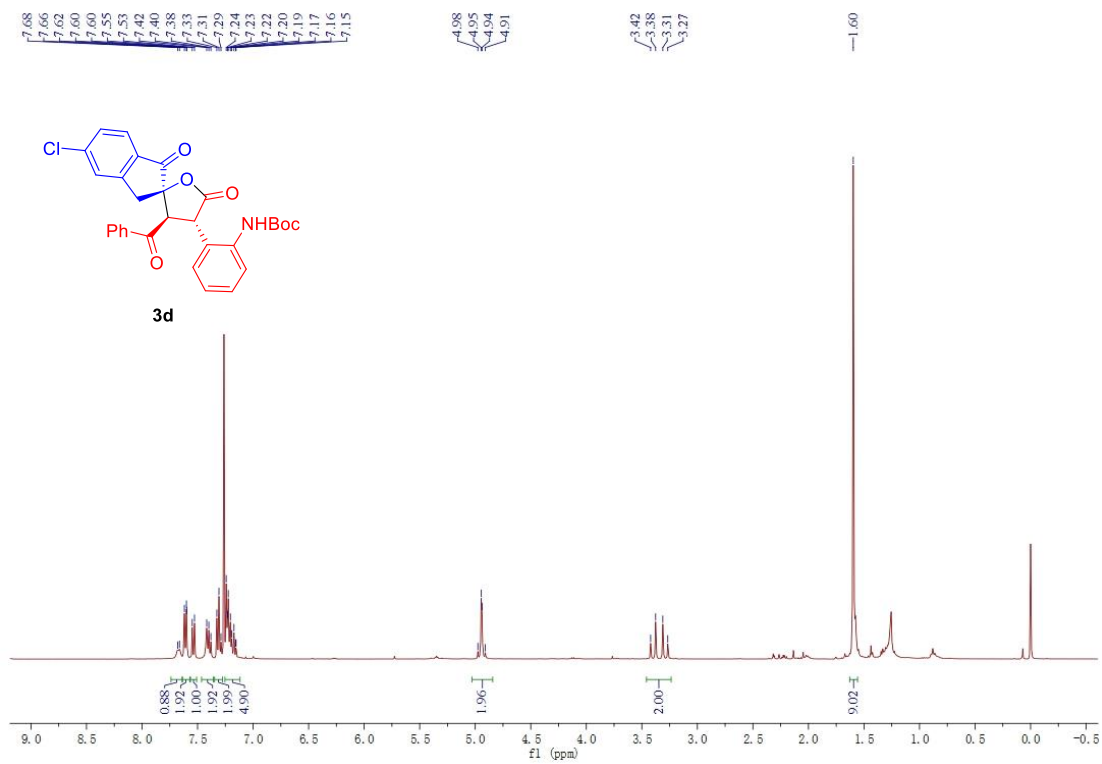

**$^{13}\text{C}$  NMR (101 MHz,  $\text{CDCl}_3$ )**

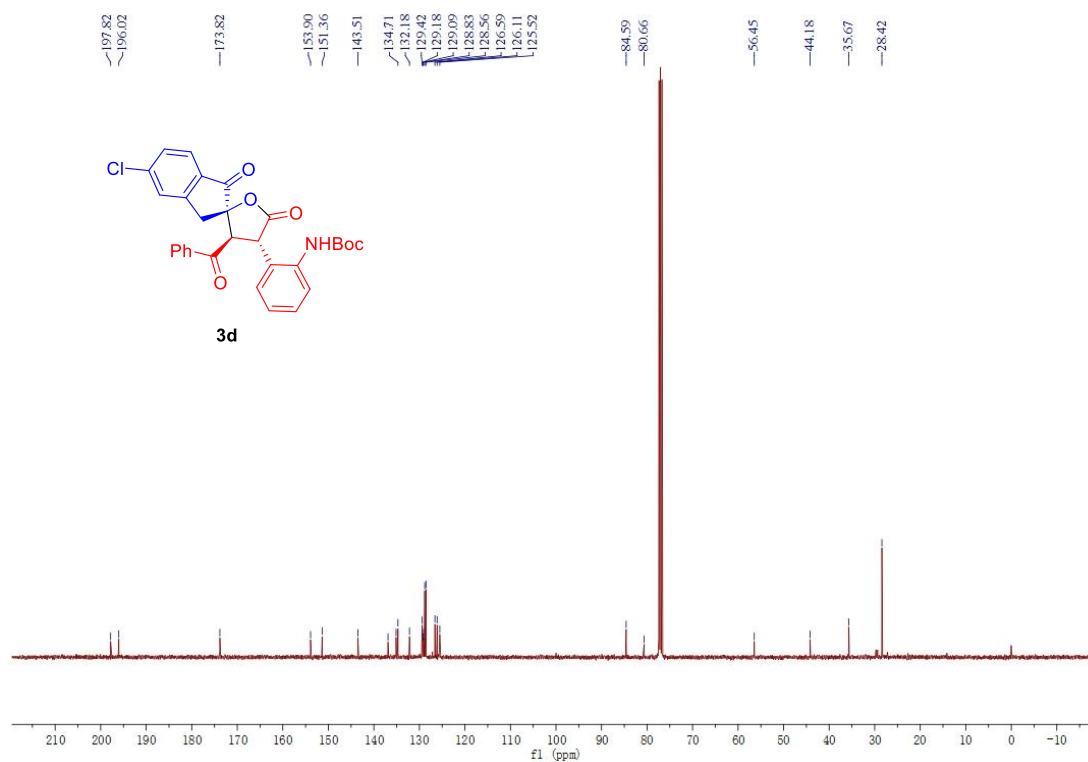

**$^1\text{H}$  NMR (400 MHz,  $\text{CDCl}_3$ )**

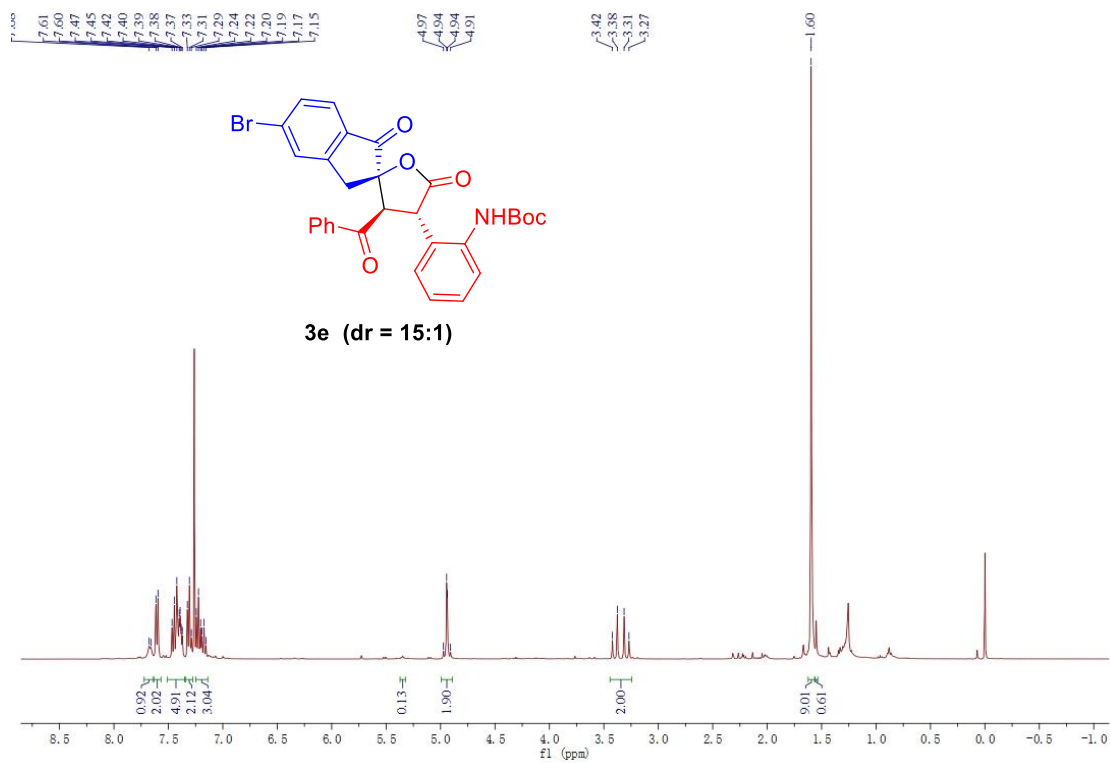

**$^{13}\text{C}$  NMR (101 MHz,  $\text{CDCl}_3$ )**

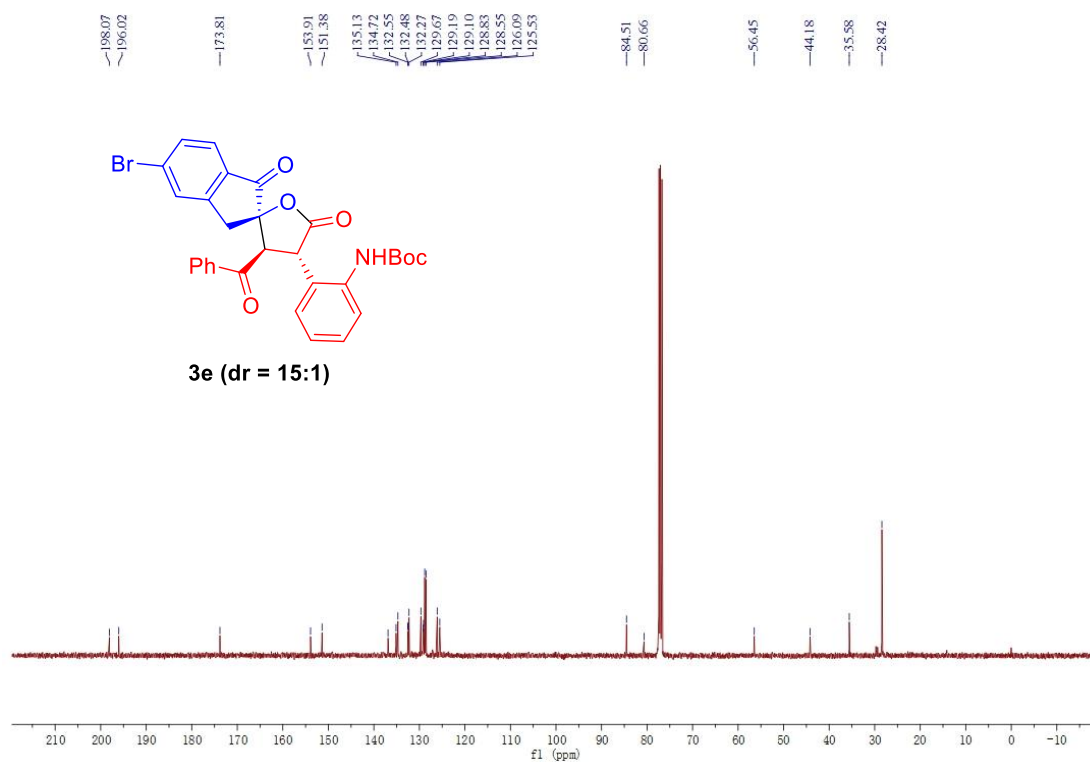

**$^1\text{H}$  NMR (400 MHz,  $\text{CDCl}_3$ )**

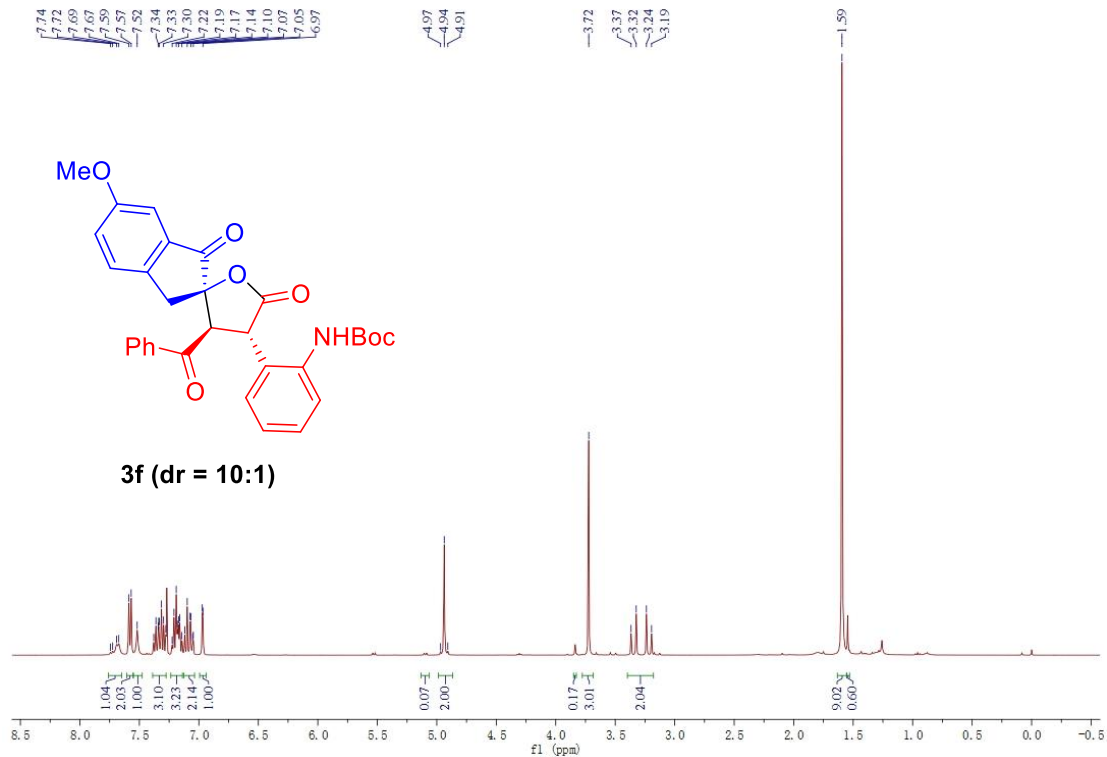

$^{13}\text{C}$  NMR (101 MHz,  $\text{CDCl}_3$ )

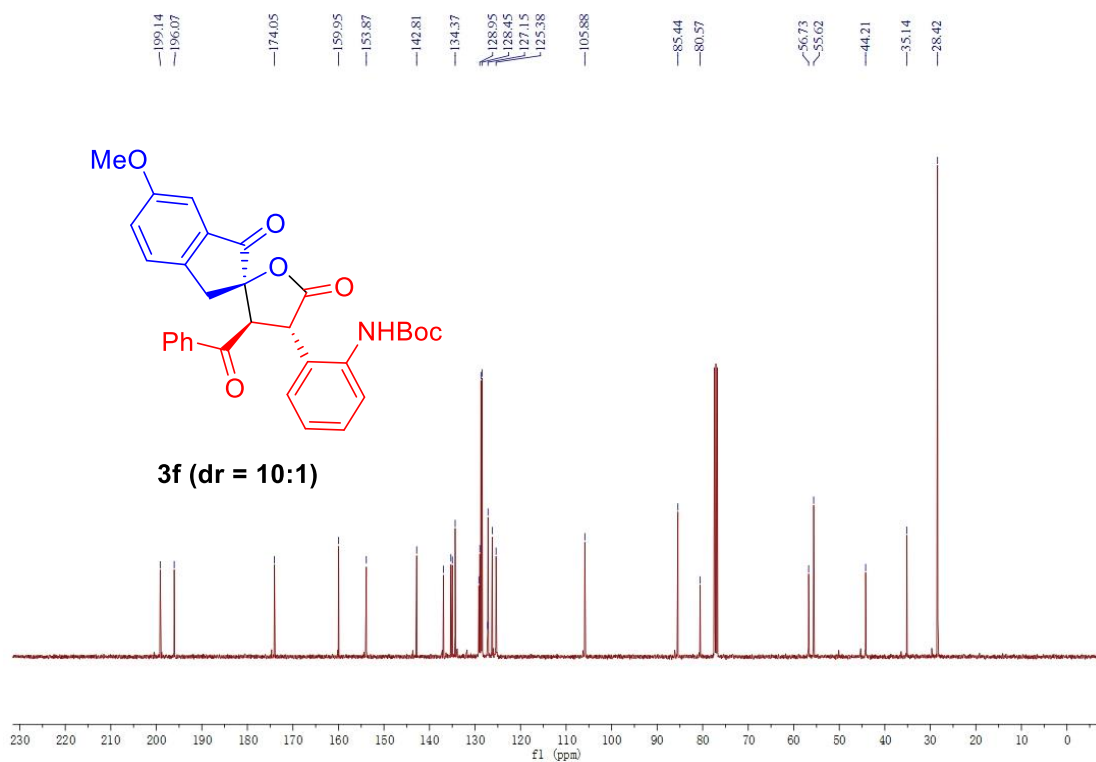

$^1\text{H}$  NMR (400 MHz,  $\text{CDCl}_3$ )

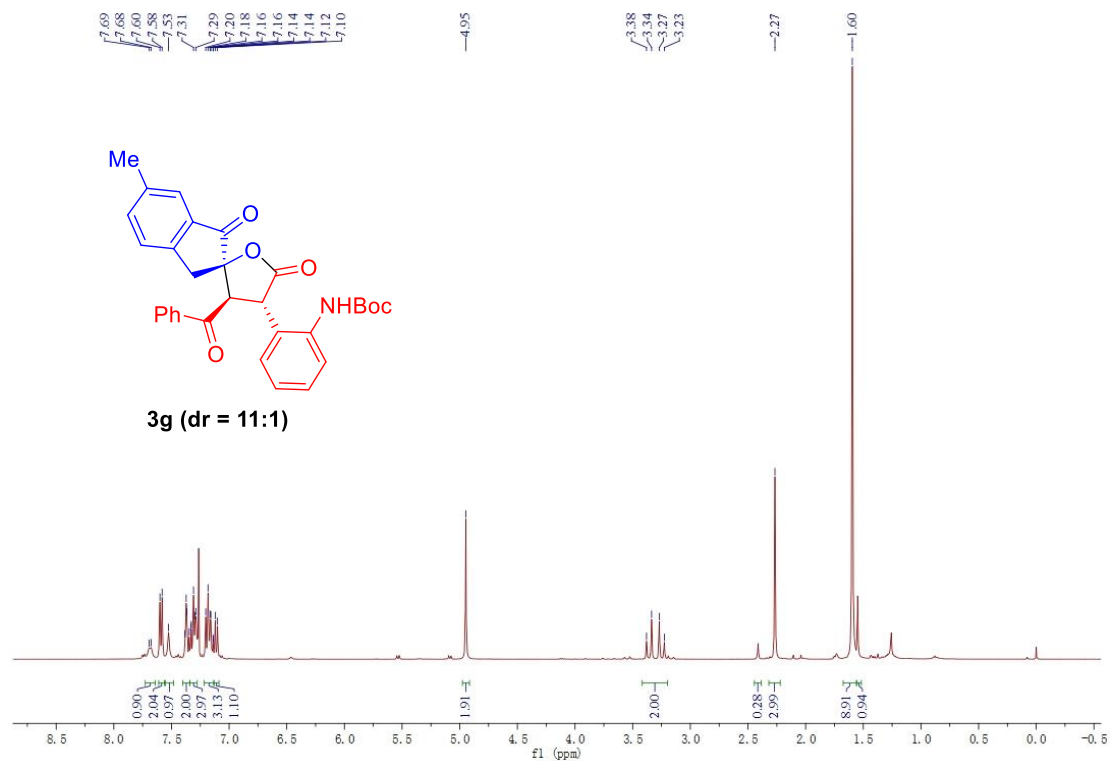

**$^{13}\text{C}$  NMR (101 MHz,  $\text{CDCl}_3$ )**

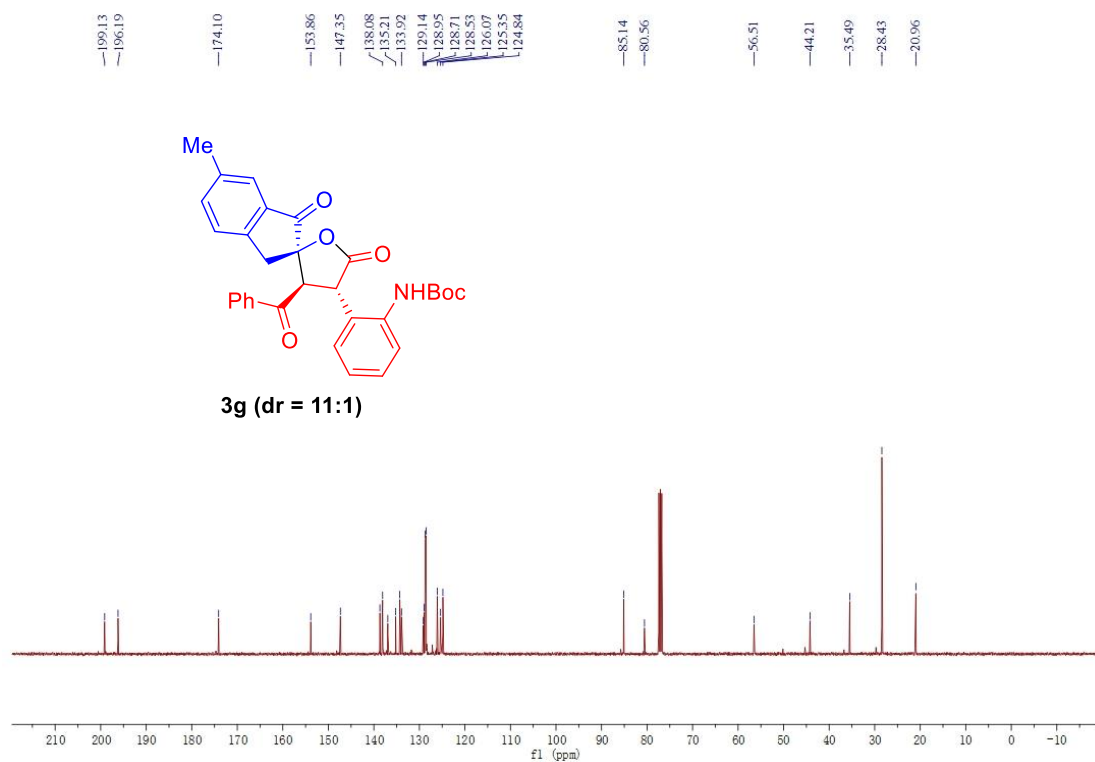

**$^1\text{H}$  NMR (400 MHz,  $\text{CDCl}_3$ )**

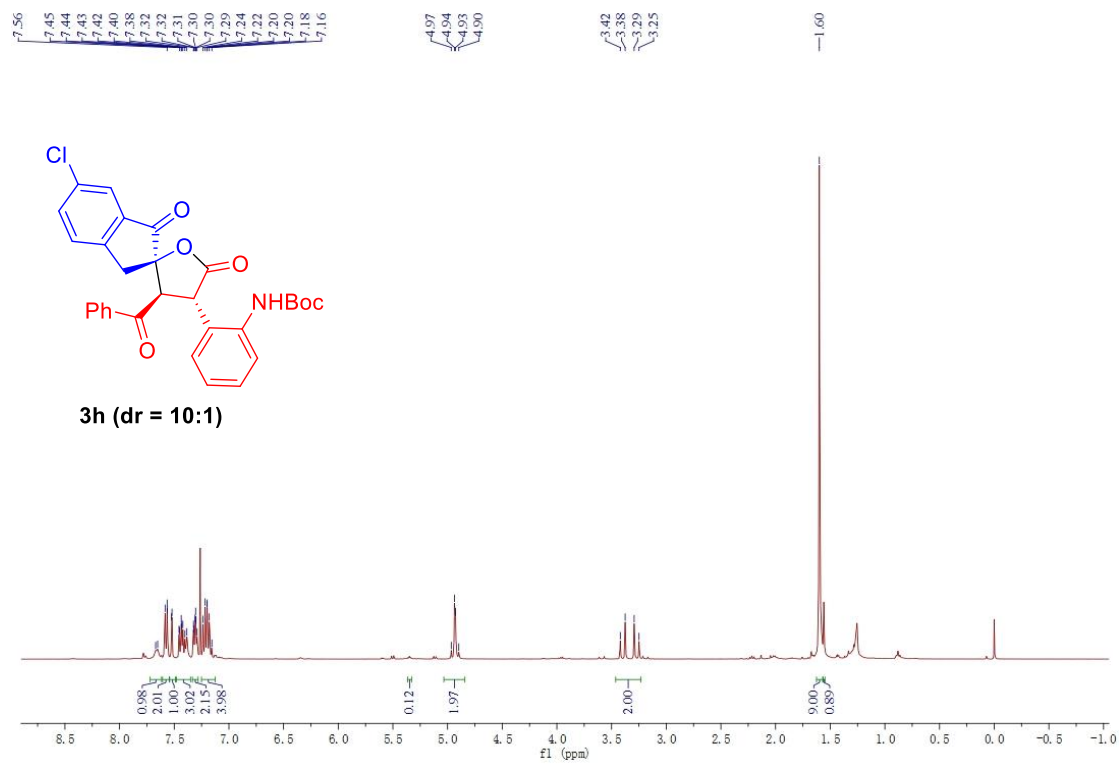

**$^{13}\text{C}$  NMR (101 MHz,  $\text{CDCl}_3$ )**

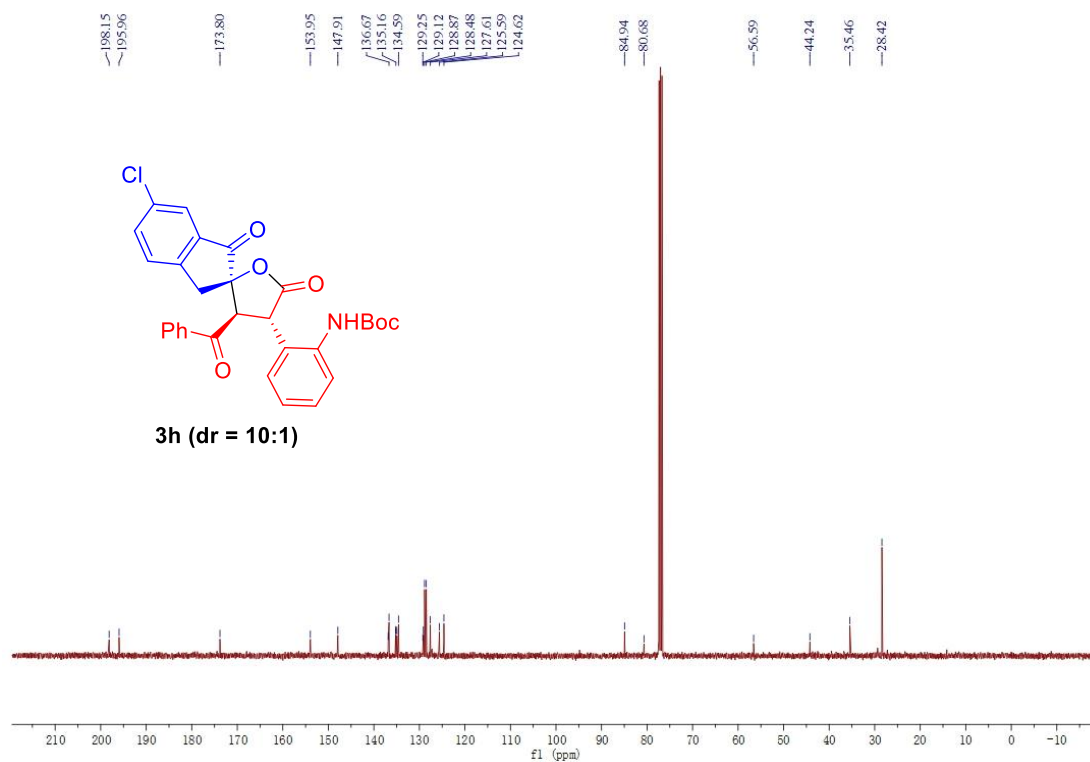

**$^1\text{H}$  NMR (400 MHz,  $\text{CDCl}_3$ )**

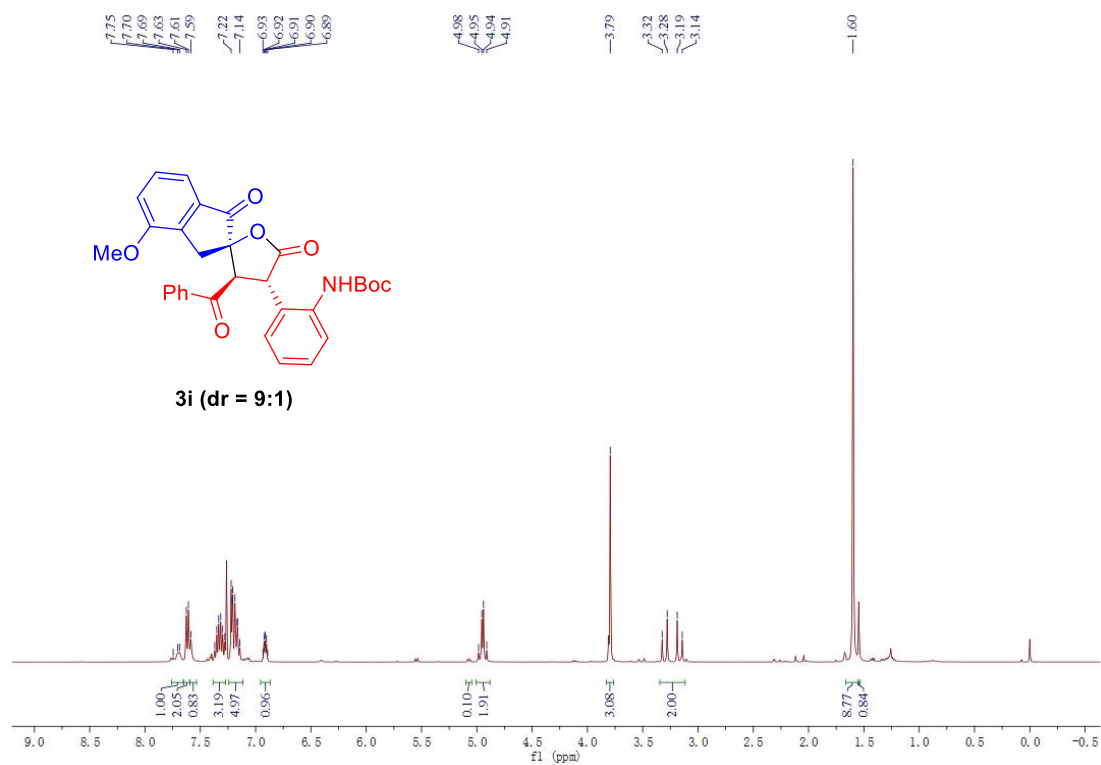

**$^{13}\text{C}$  NMR (101 MHz,  $\text{CDCl}_3$ )**

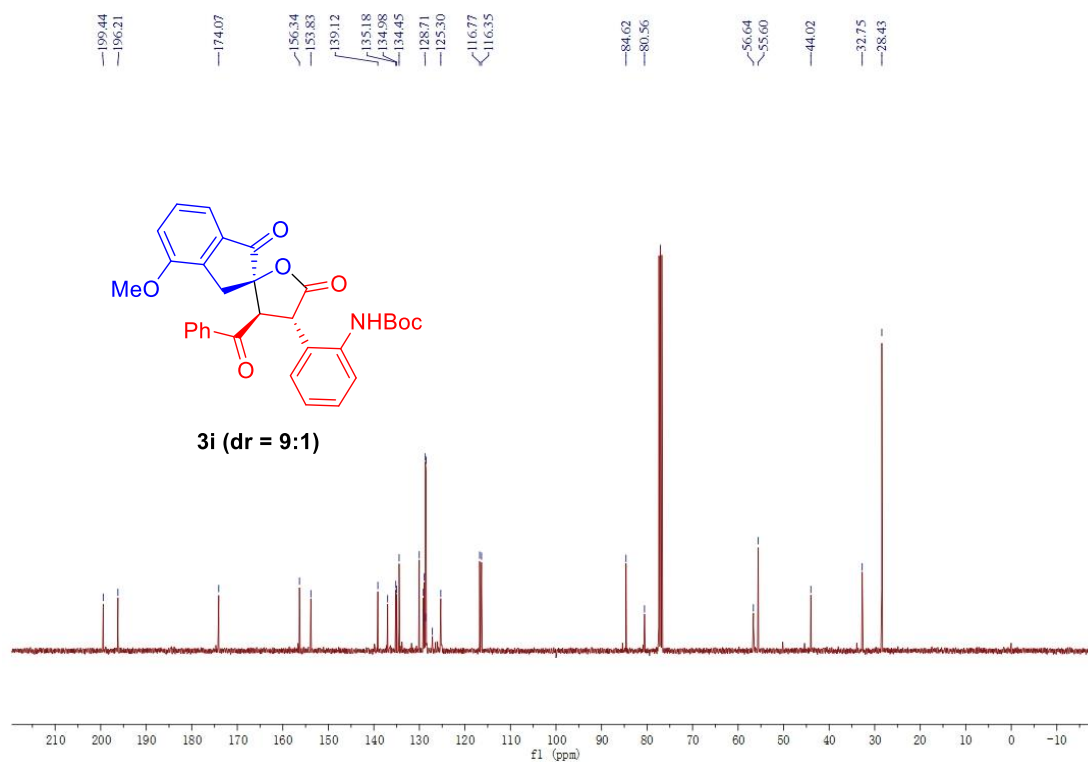

**$^1\text{H}$  NMR (400 MHz,  $\text{CDCl}_3$ )**

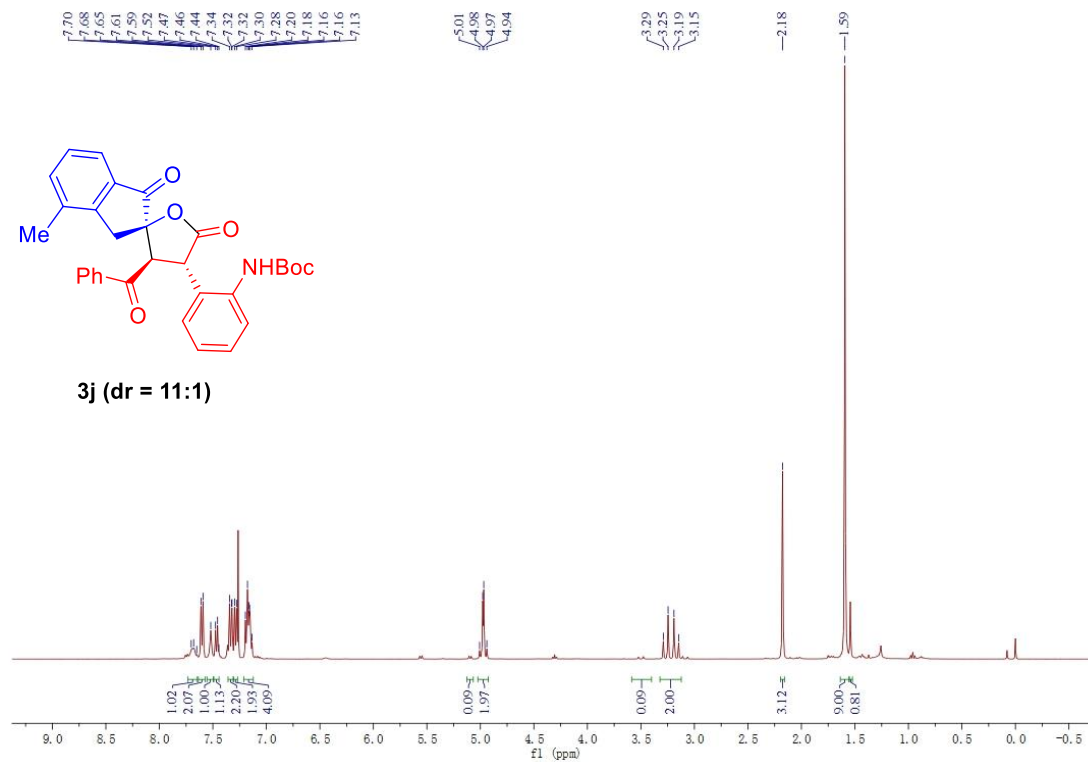

**$^{13}\text{C}$  NMR (101 MHz,  $\text{CDCl}_3$ )**

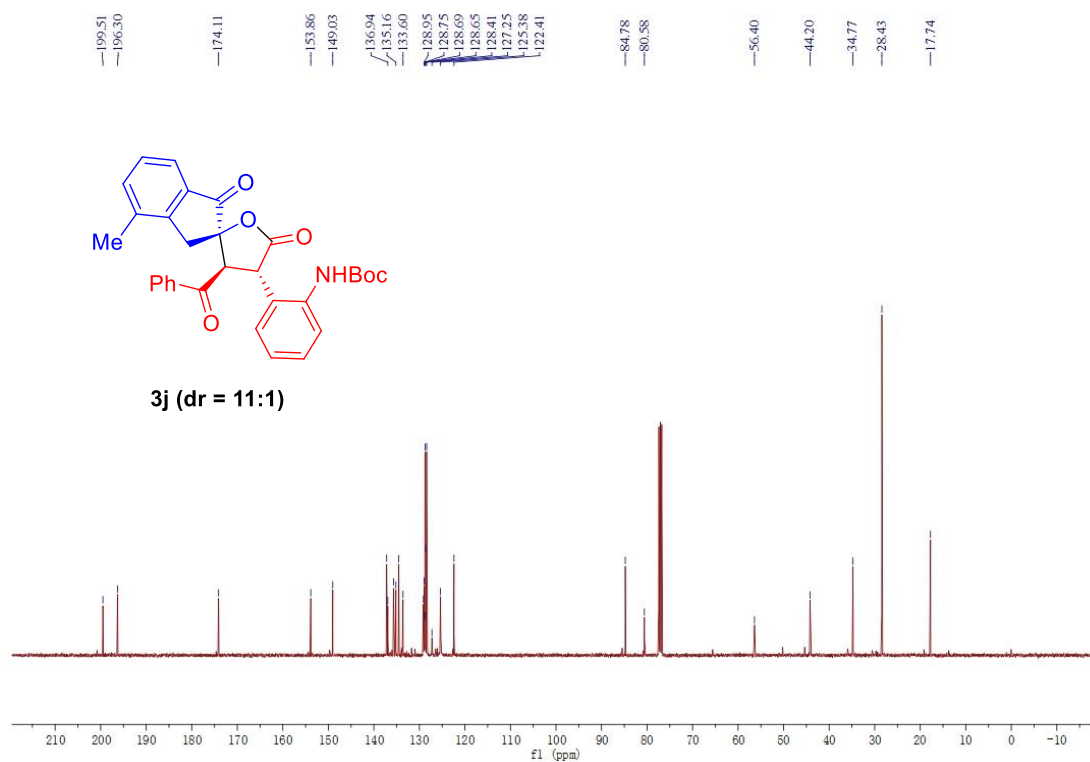

**$^1\text{H}$  NMR (400 MHz,  $\text{CDCl}_3$ )**

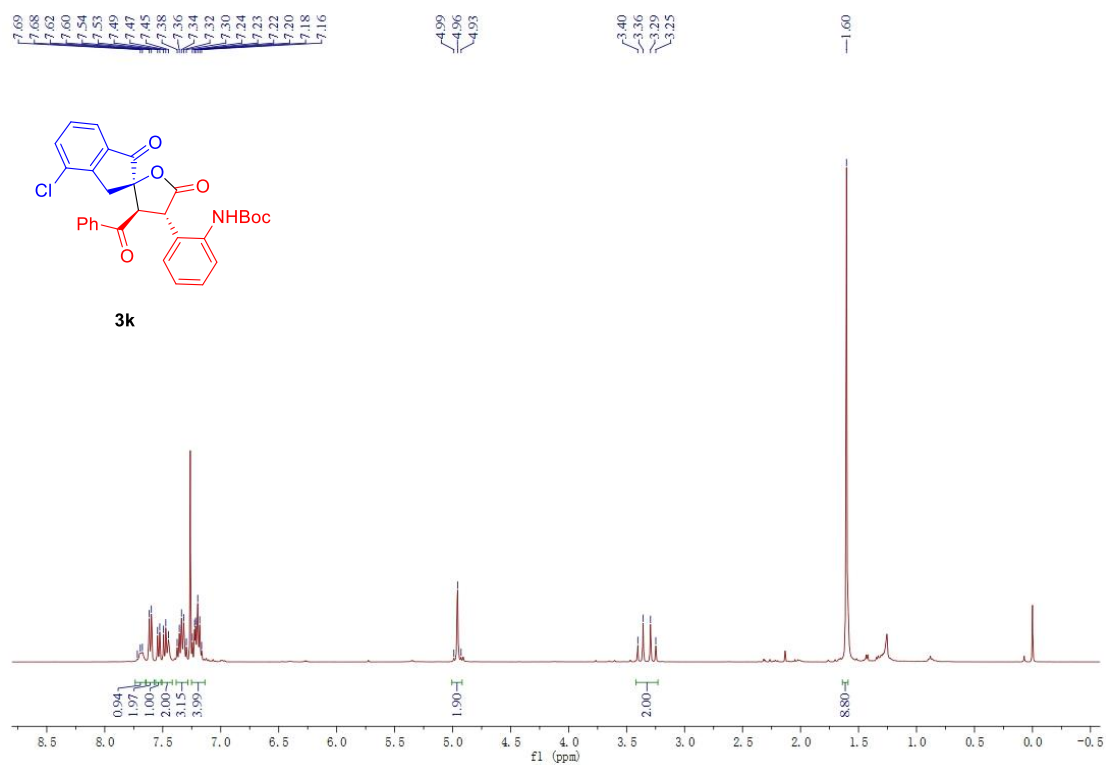

**$^{13}\text{C}$  NMR (101 MHz,  $\text{CDCl}_3$ )**

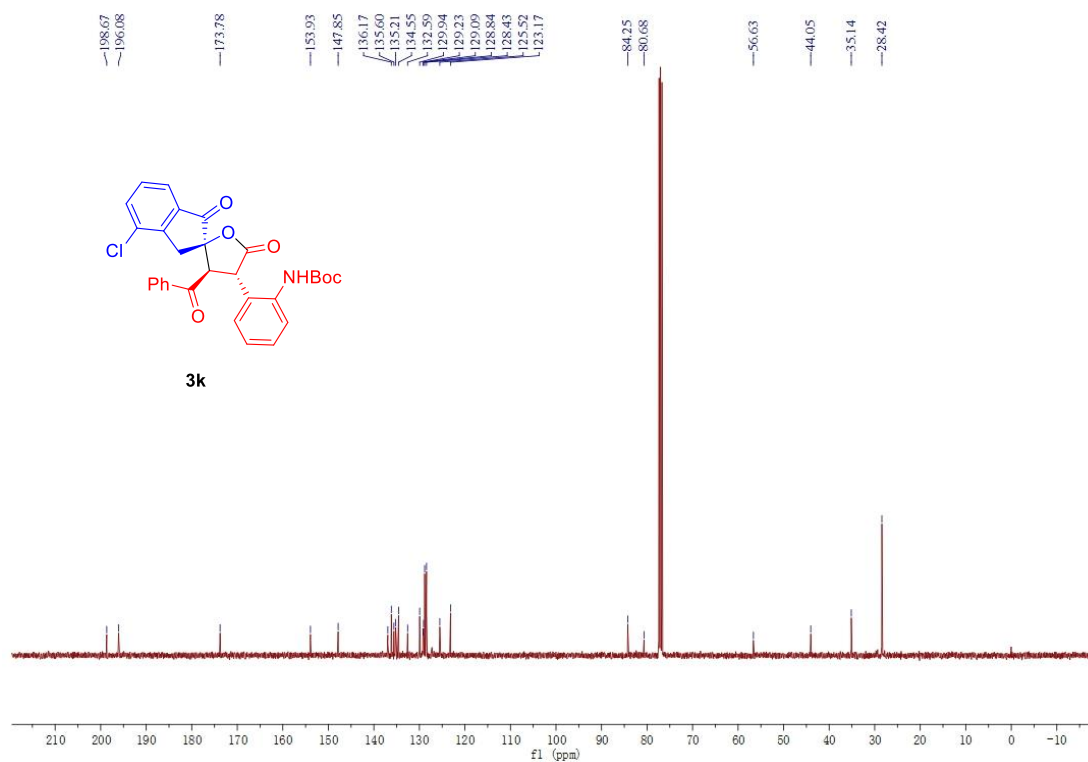

**$^1\text{H}$  NMR (400 MHz,  $\text{CDCl}_3$ )**

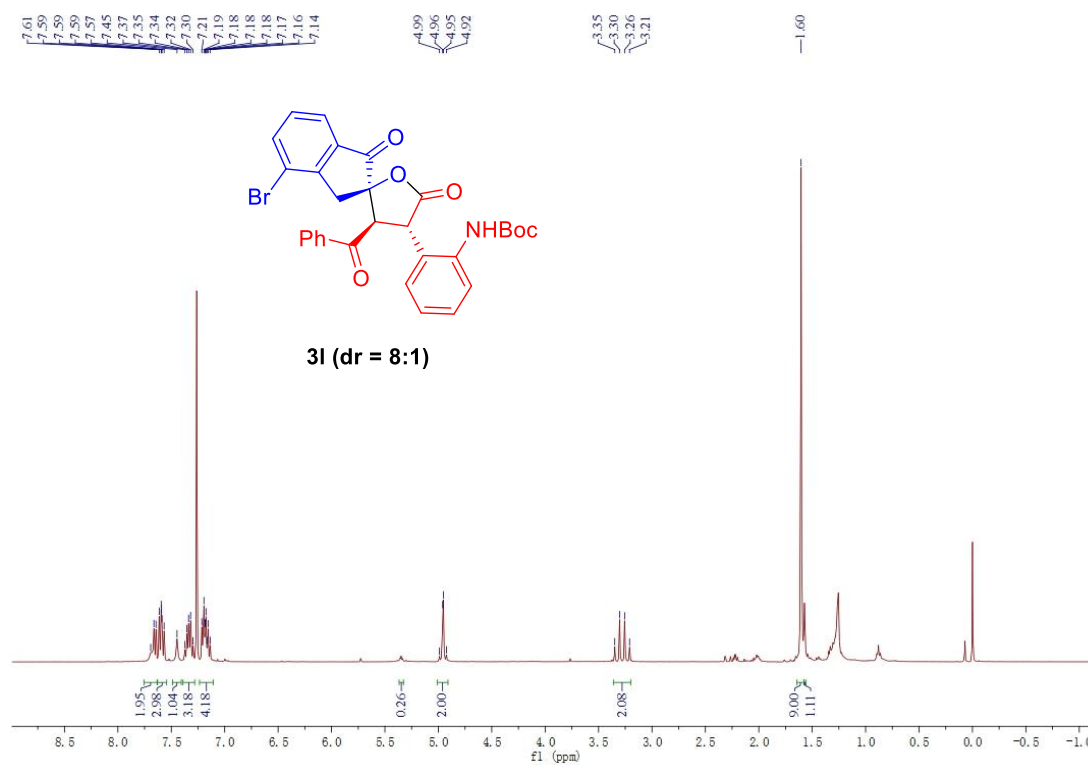

**$^{13}\text{C}$  NMR (101 MHz,  $\text{CDCl}_3$ )**

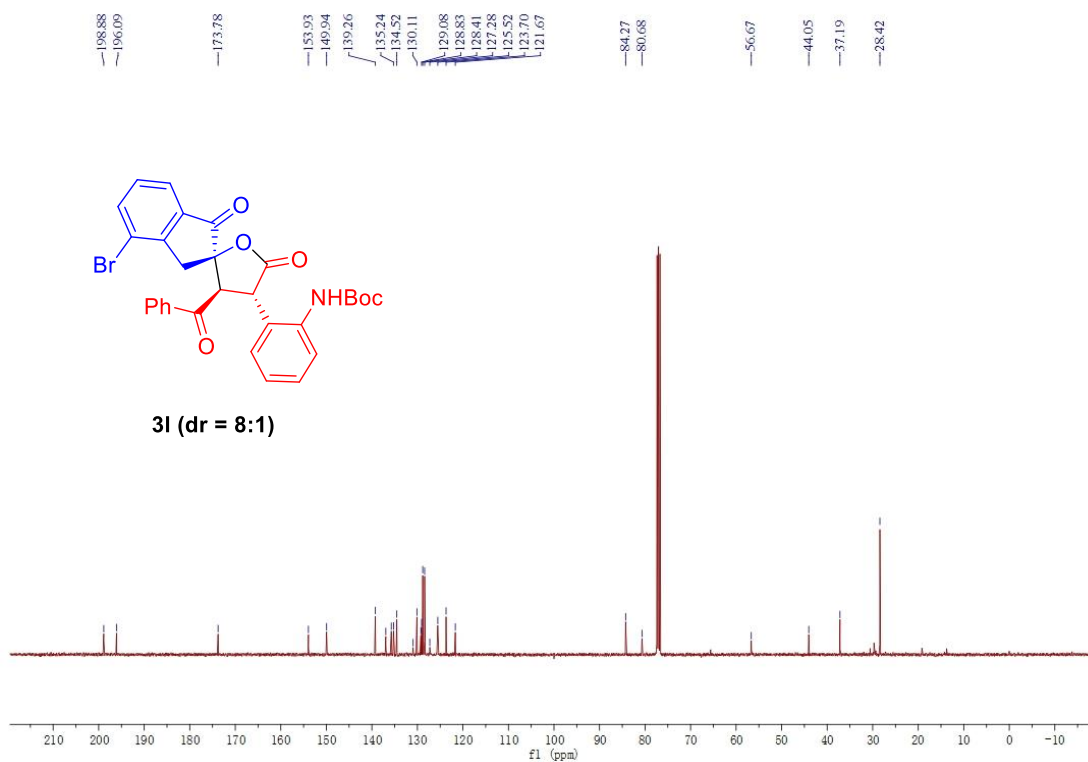

**$^1\text{H}$  NMR (400 MHz,  $\text{CDCl}_3$ )**

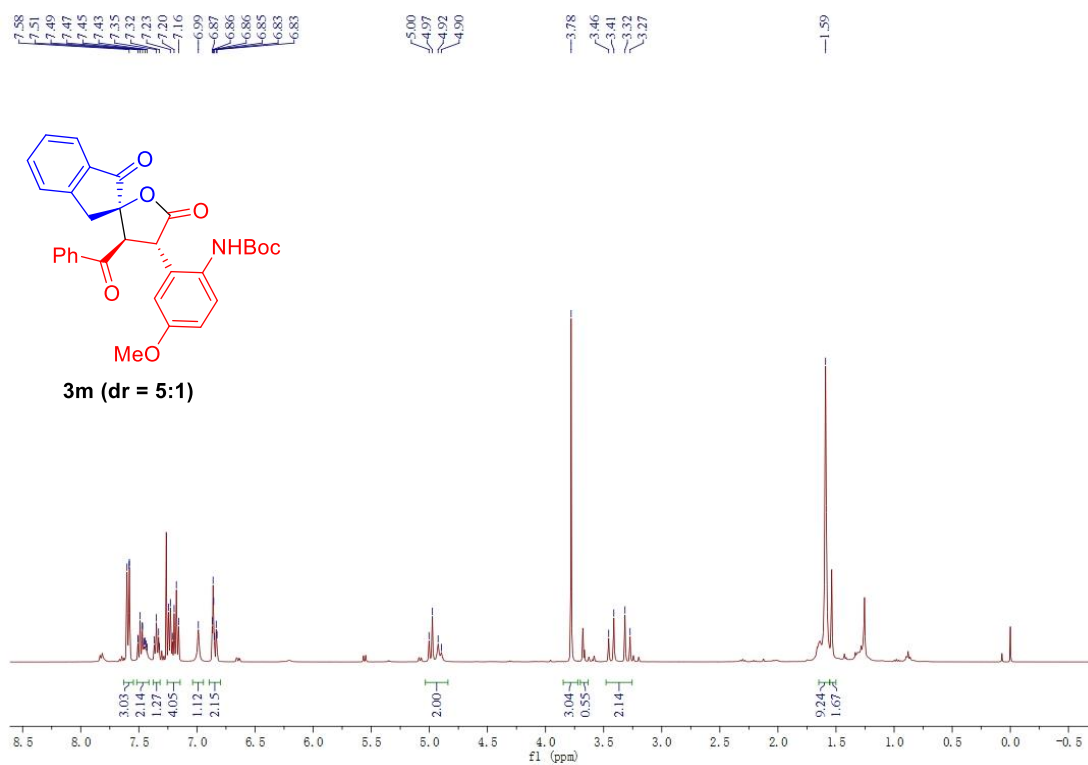

**$^{13}\text{C}$  NMR (101 MHz,  $\text{CDCl}_3$ )**

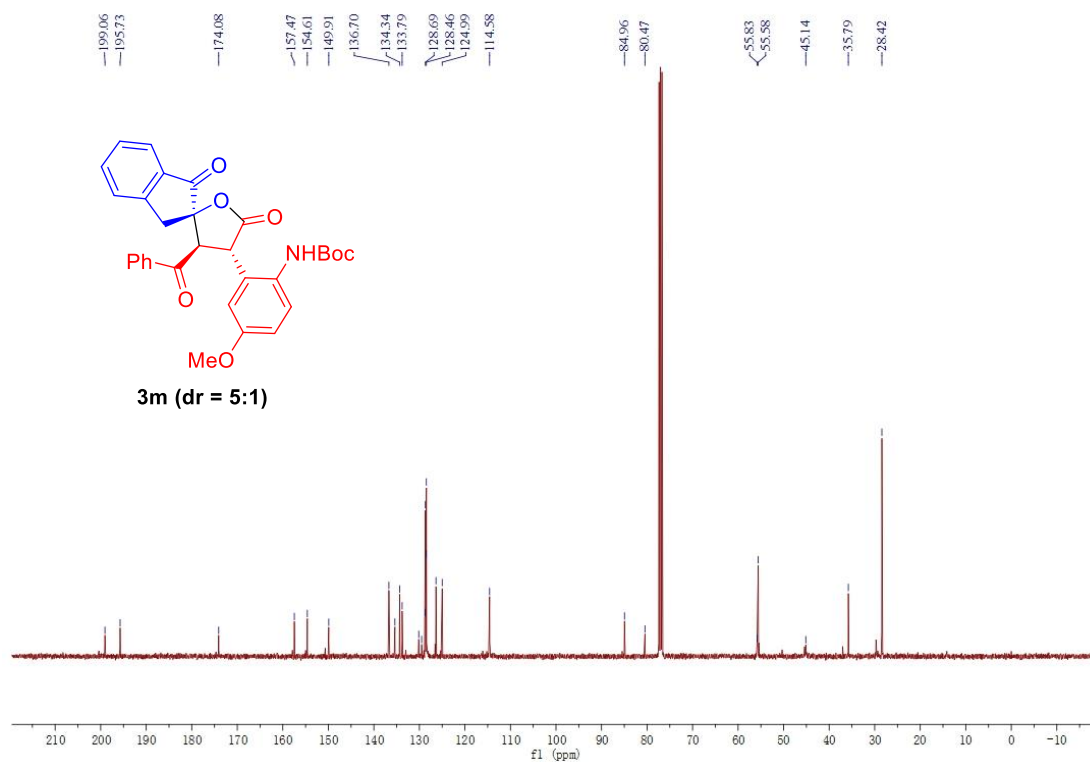

**$^1\text{H}$  NMR (400 MHz,  $\text{CDCl}_3$ )**

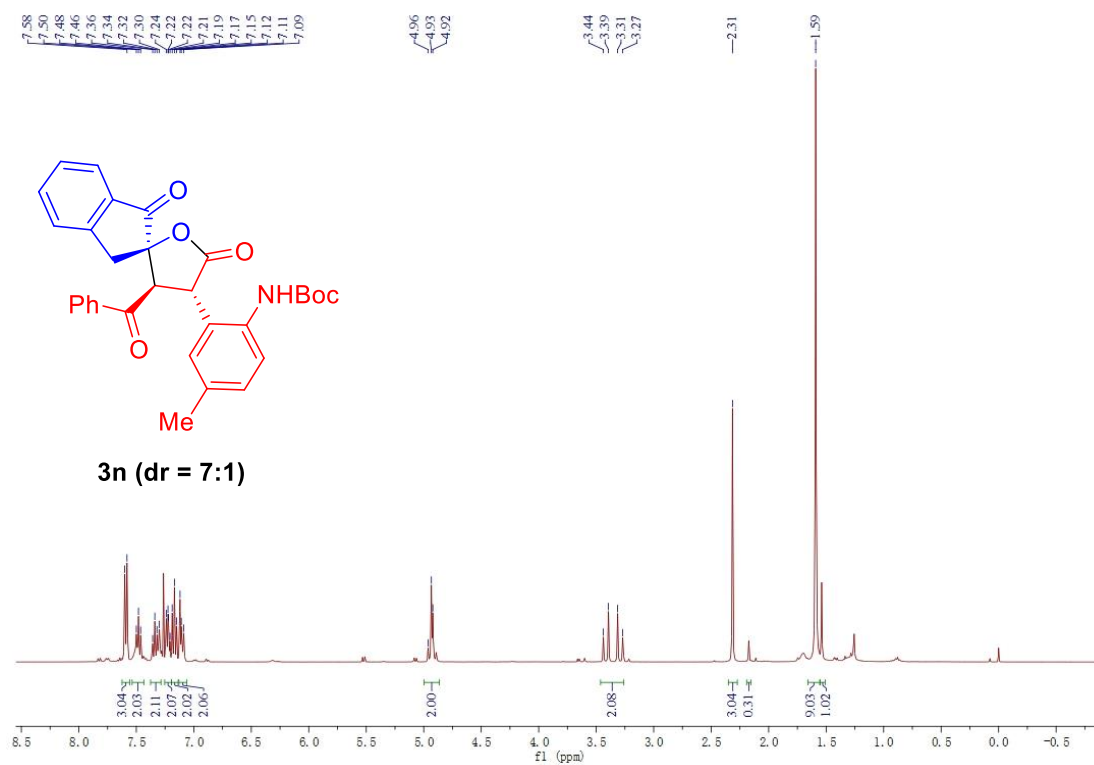

**$^{13}\text{C}$  NMR (101 MHz,  $\text{CDCl}_3$ )**

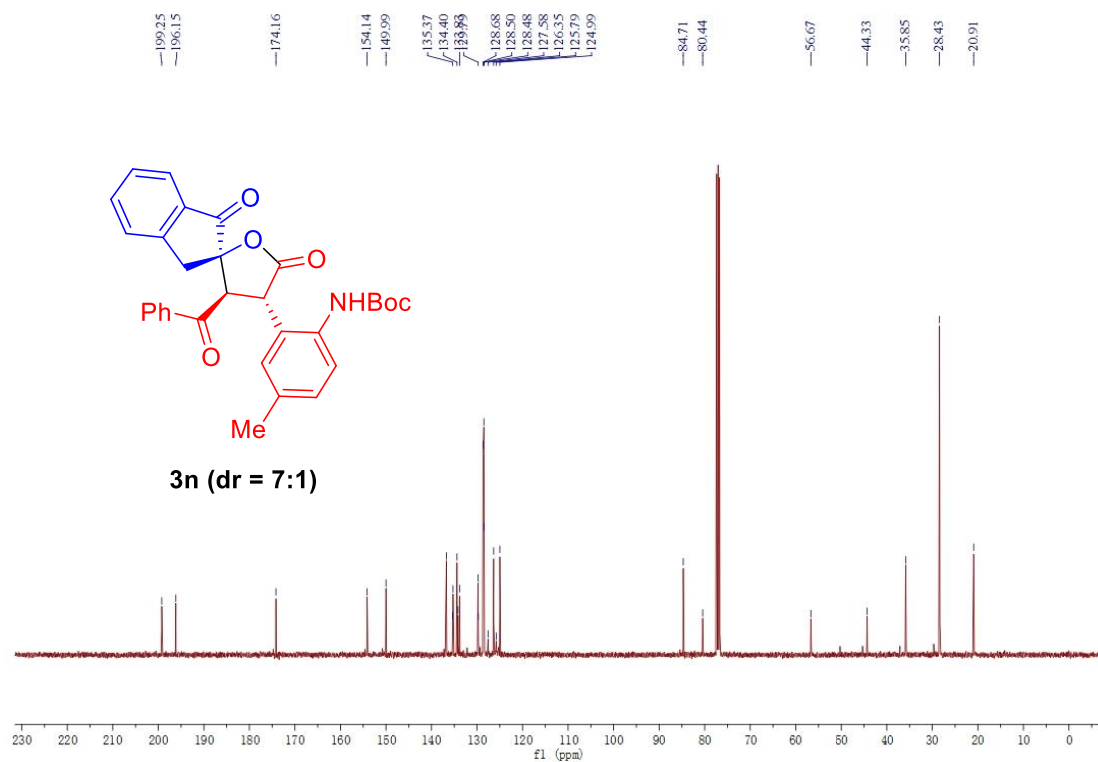

**$^1\text{H}$  NMR (400 MHz,  $\text{CDCl}_3$ )**

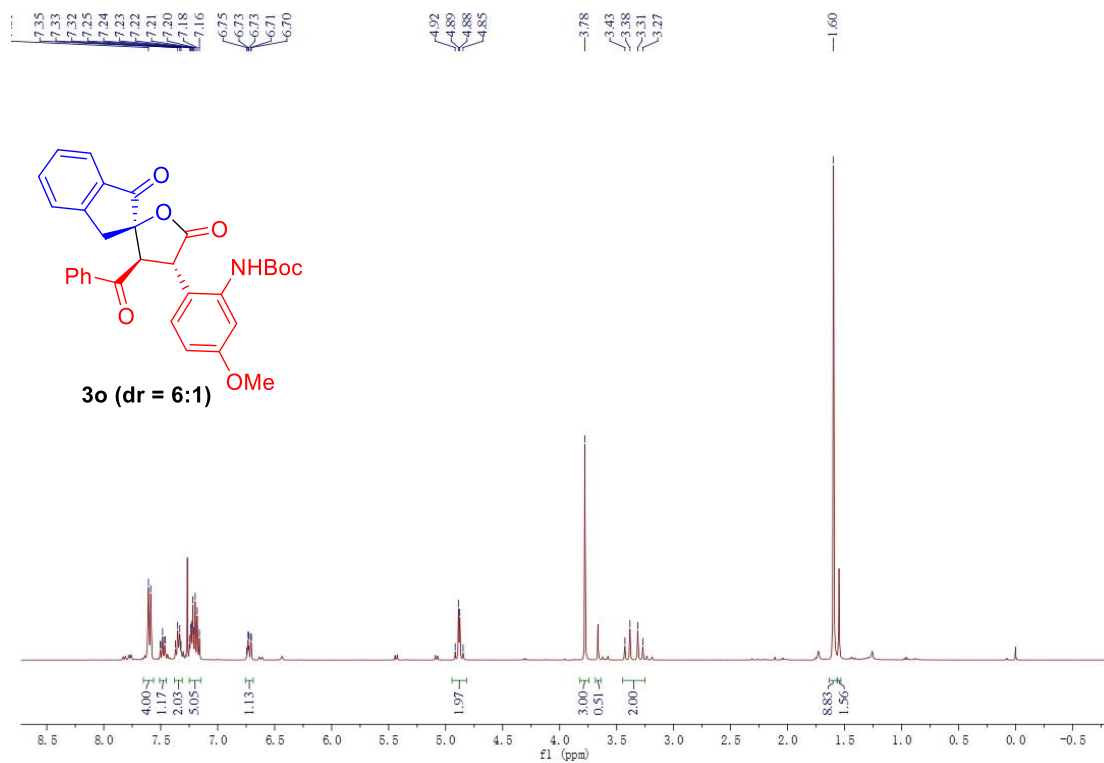

**$^{13}\text{C}$  NMR (101 MHz,  $\text{CDCl}_3$ )**

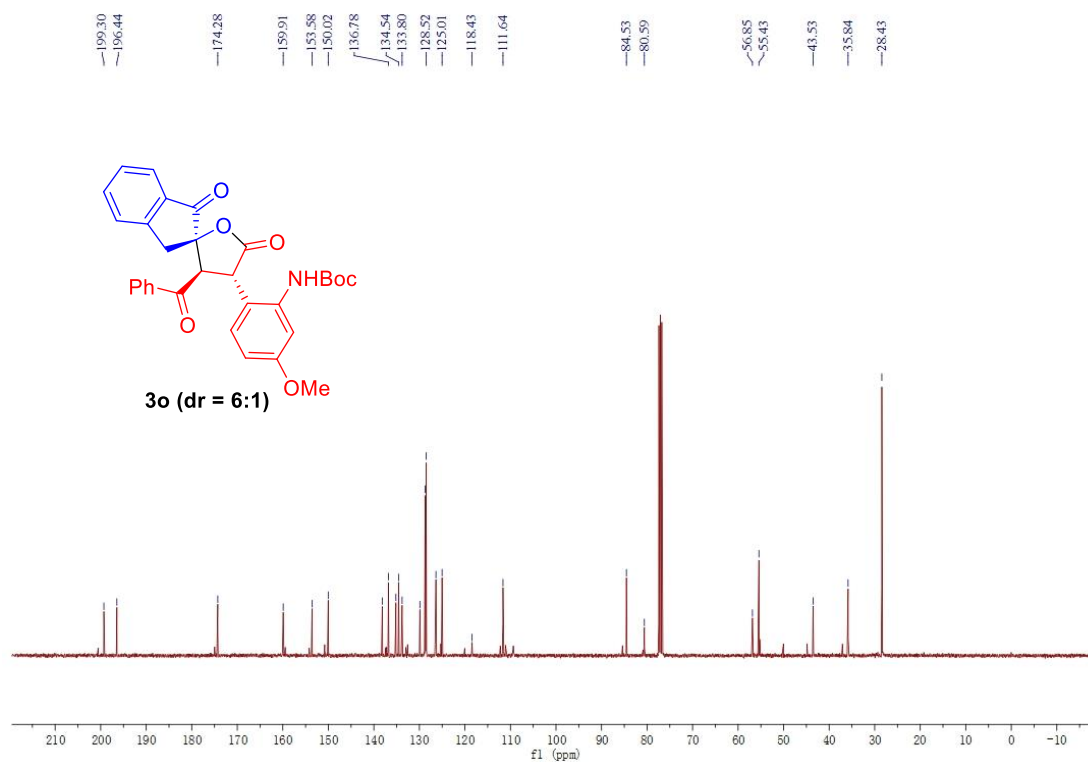

**$^1\text{H}$  NMR (400 MHz,  $\text{CDCl}_3$ )**

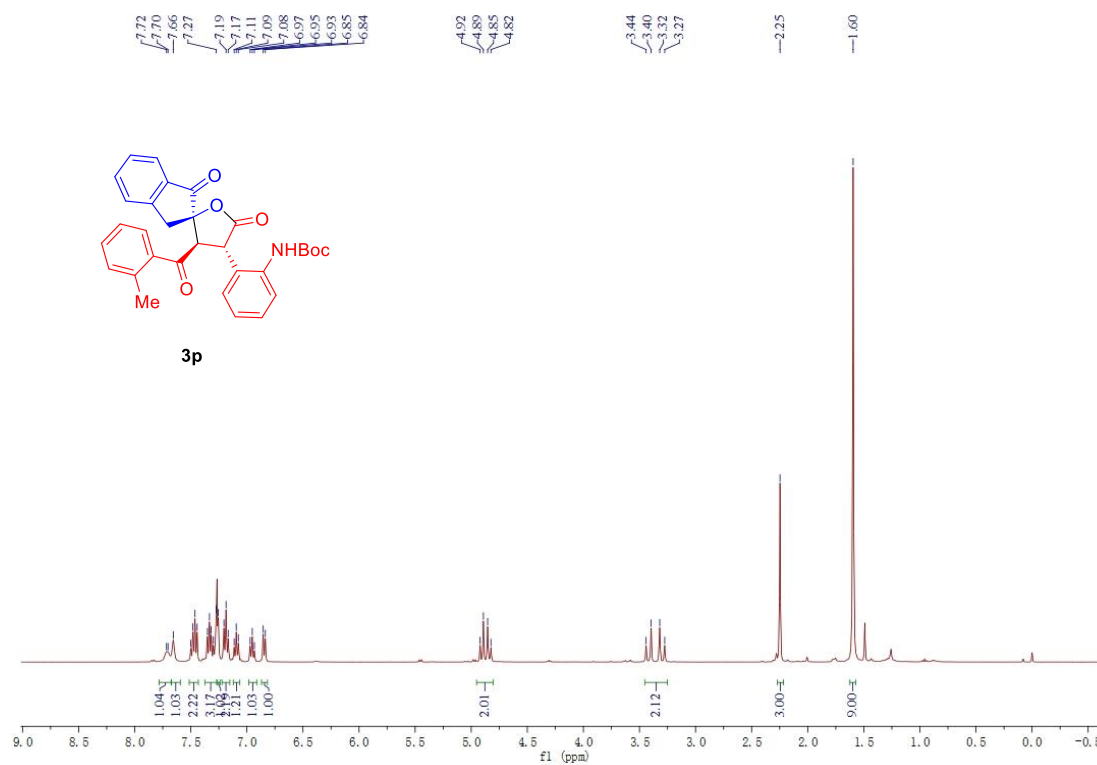

**$^{13}\text{C}$  NMR (101 MHz,  $\text{CDCl}_3$ )**

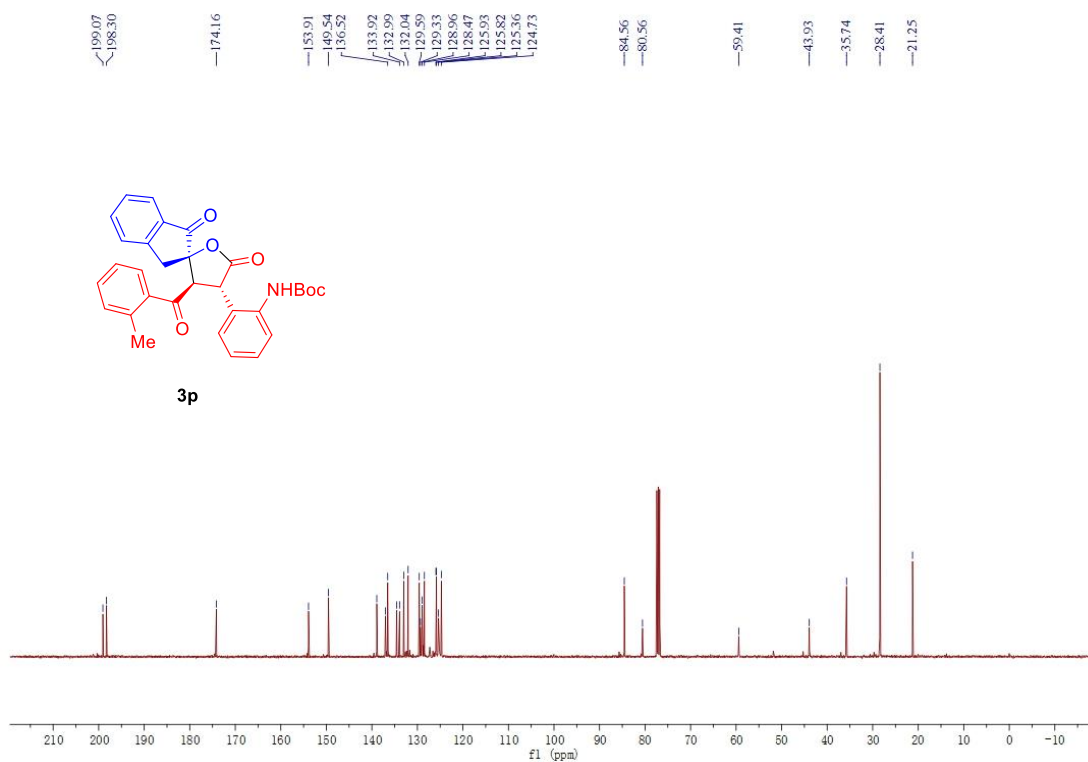

**$^1\text{H}$  NMR (400 MHz,  $\text{CDCl}_3$ )**

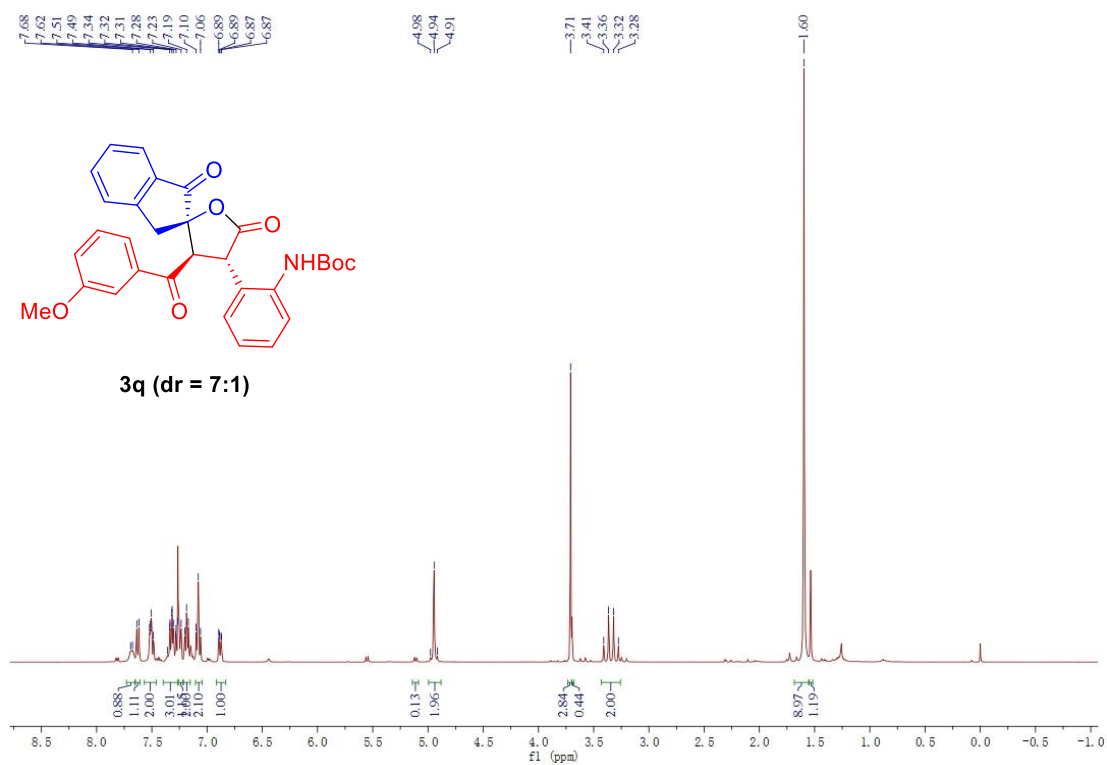

**$^{13}\text{C}$  NMR (101 MHz,  $\text{CDCl}_3$ )**

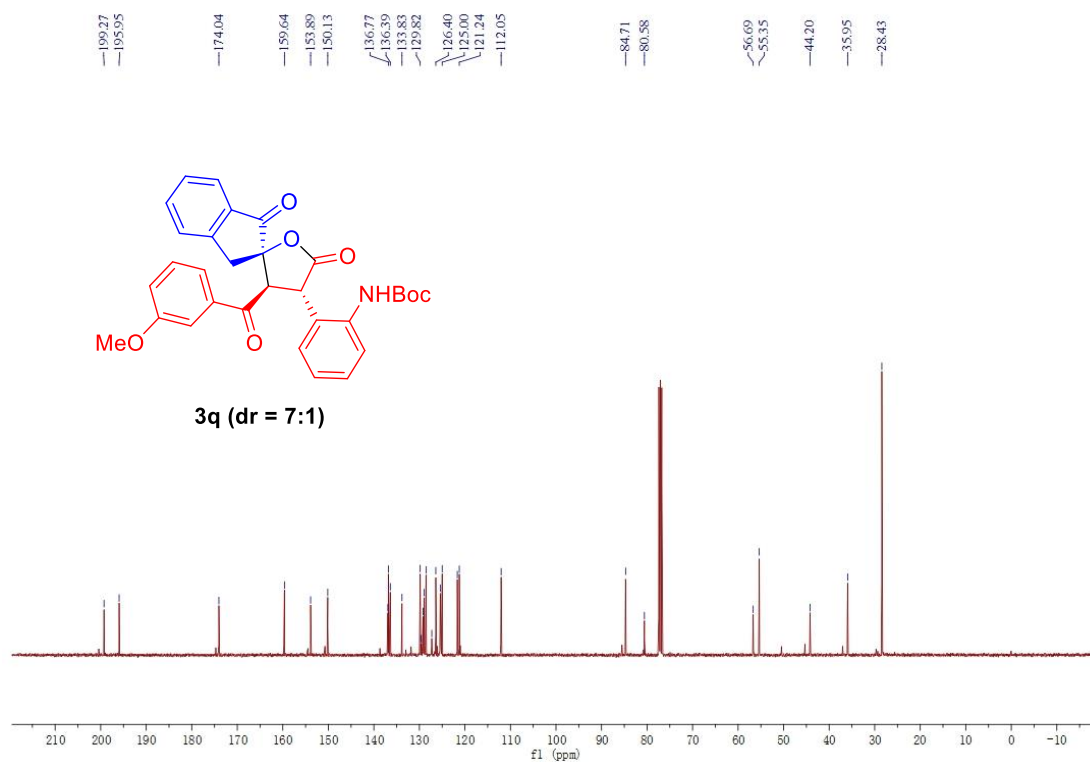

**$^1\text{H}$  NMR (400 MHz,  $\text{CDCl}_3$ )**

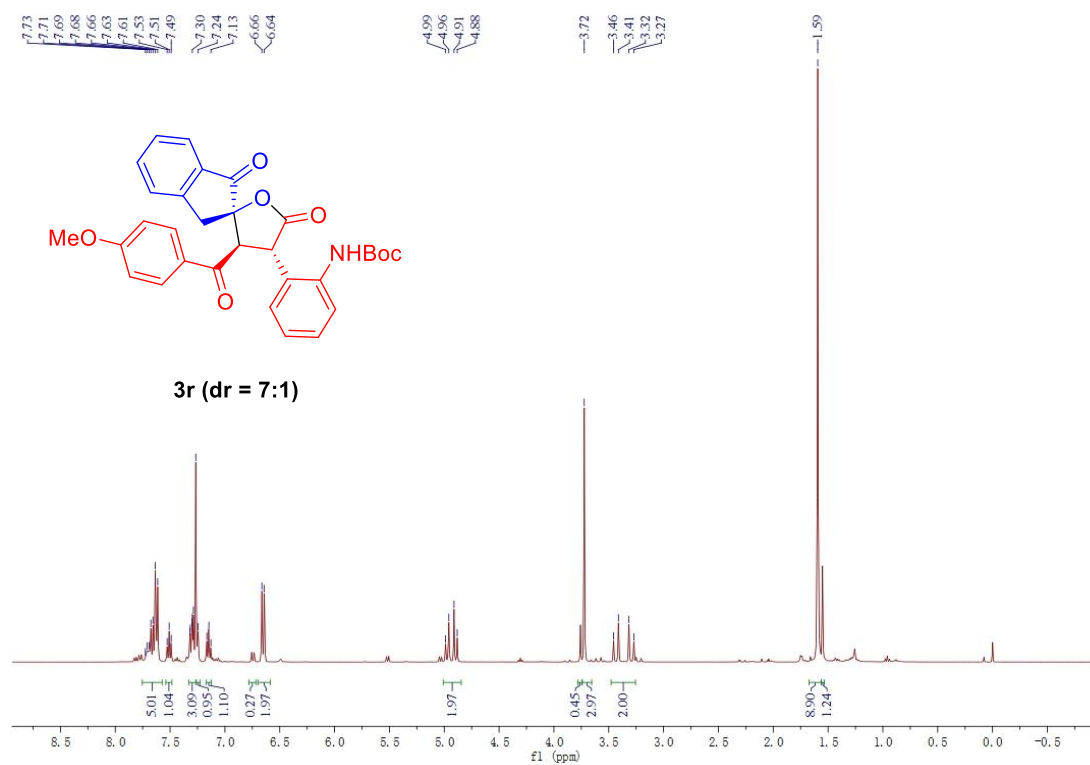

**$^{13}\text{C}$  NMR (101 MHz,  $\text{CDCl}_3$ )**

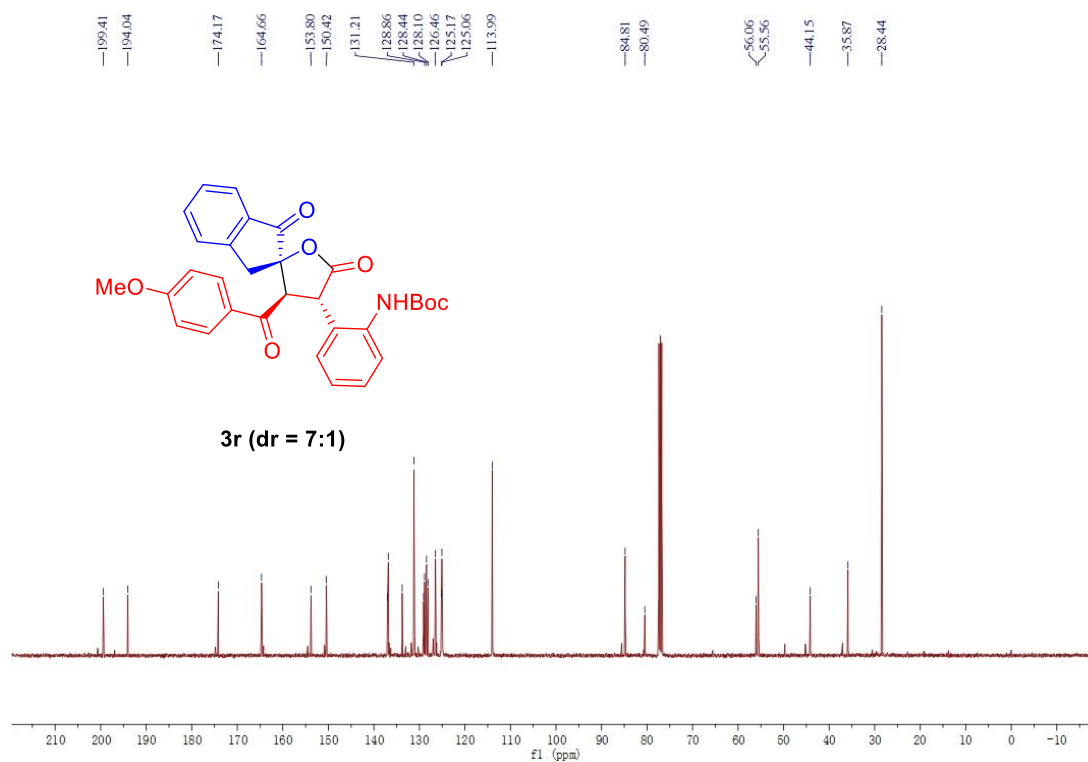

**$^1\text{H}$  NMR (400 MHz,  $\text{CDCl}_3$ )**

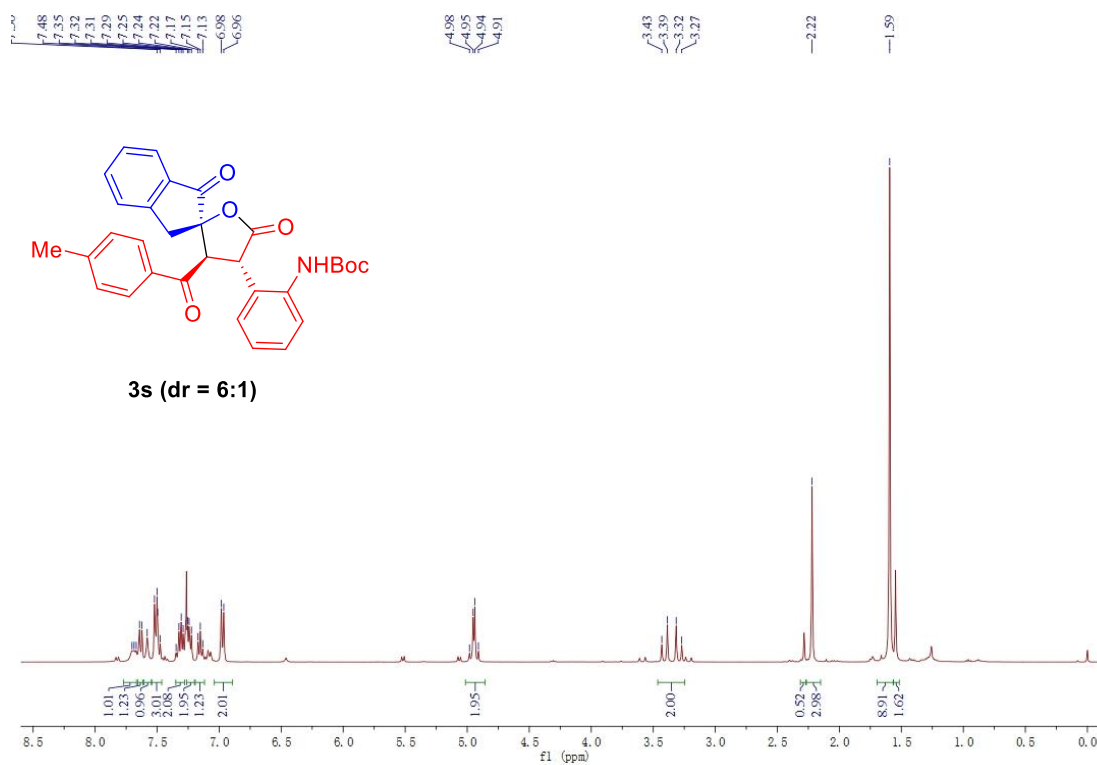

**$^{13}\text{C}$  NMR (101 MHz,  $\text{CDCl}_3$ )**

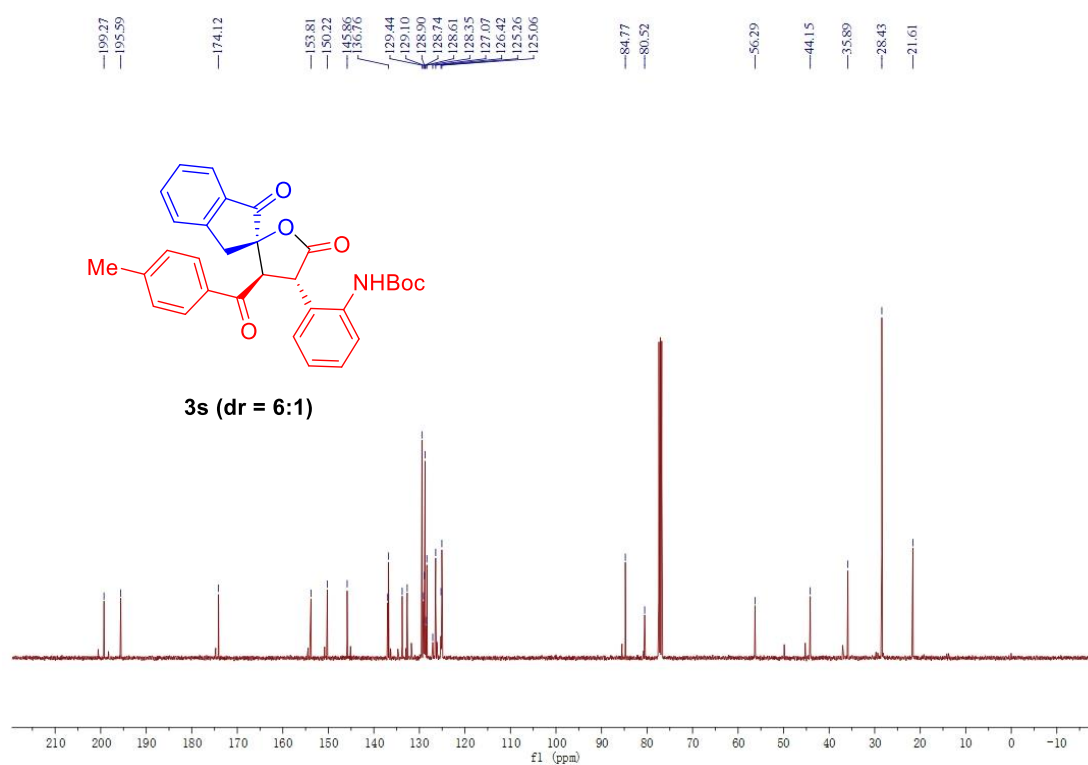

**$^1\text{H}$  NMR (400 MHz,  $\text{CDCl}_3$ )**

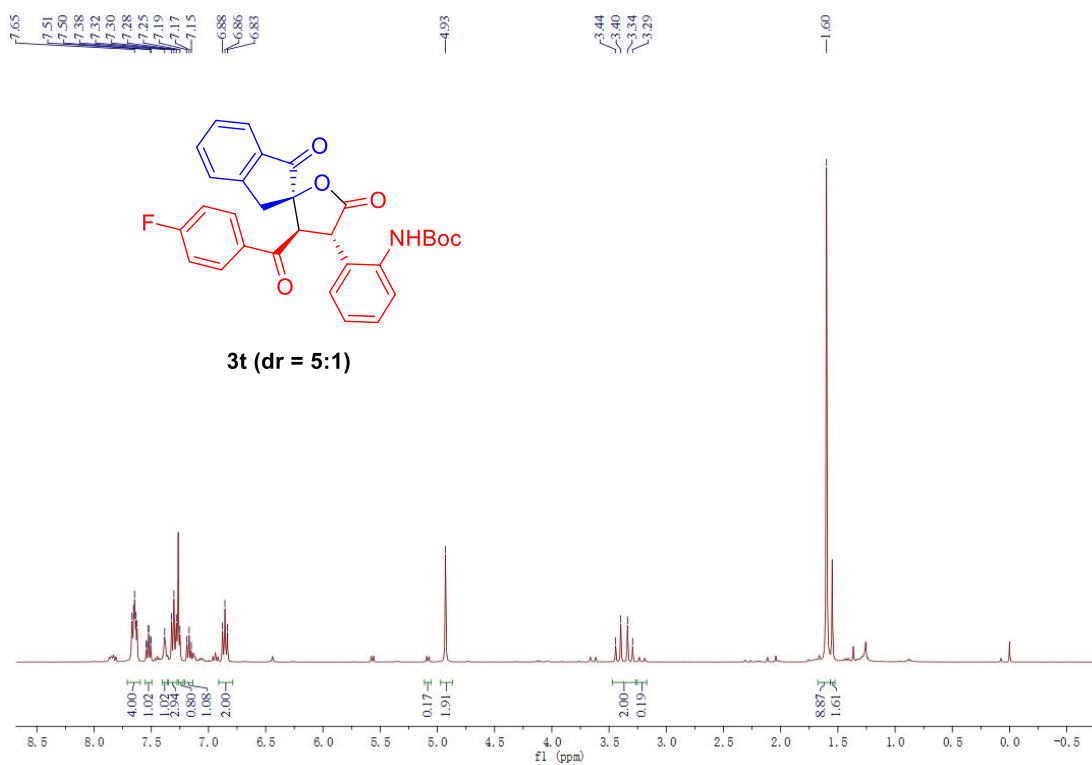

**$^{13}\text{C}$  NMR (101 MHz,  $\text{CDCl}_3$ )**

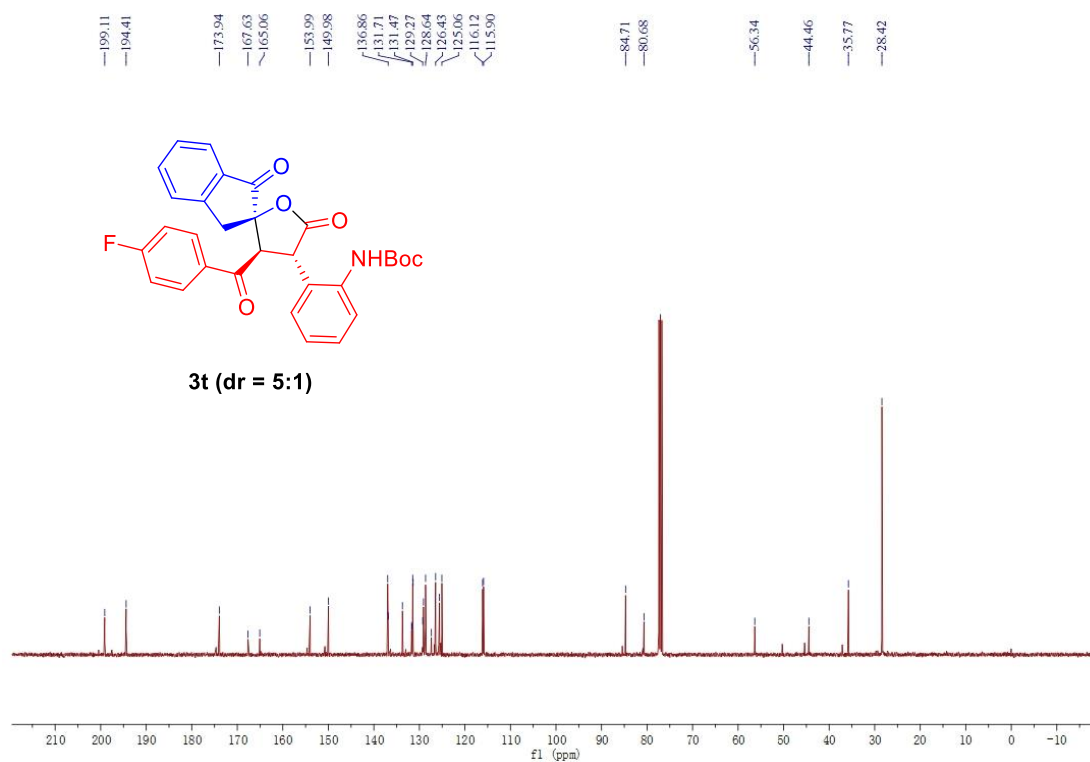

**$^{19}\text{F}$  NMR (376 MHz,  $\text{CDCl}_3$ )**

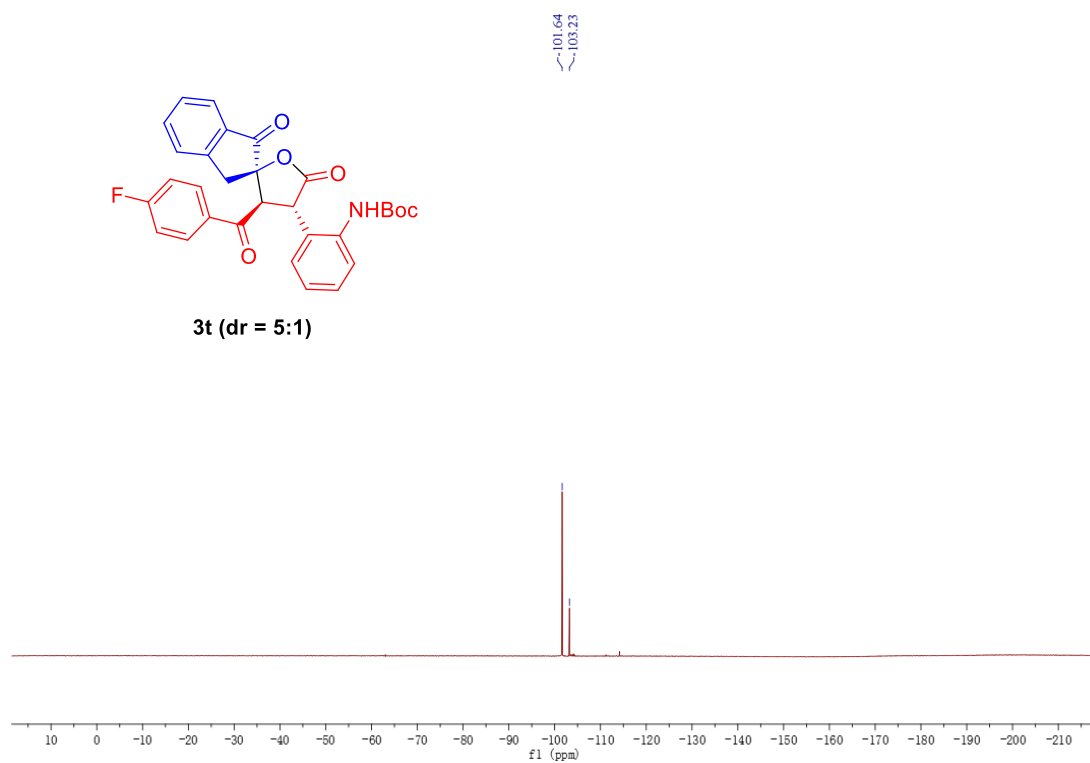

**<sup>1</sup>H NMR (400 MHz, CDCl<sub>3</sub>)**

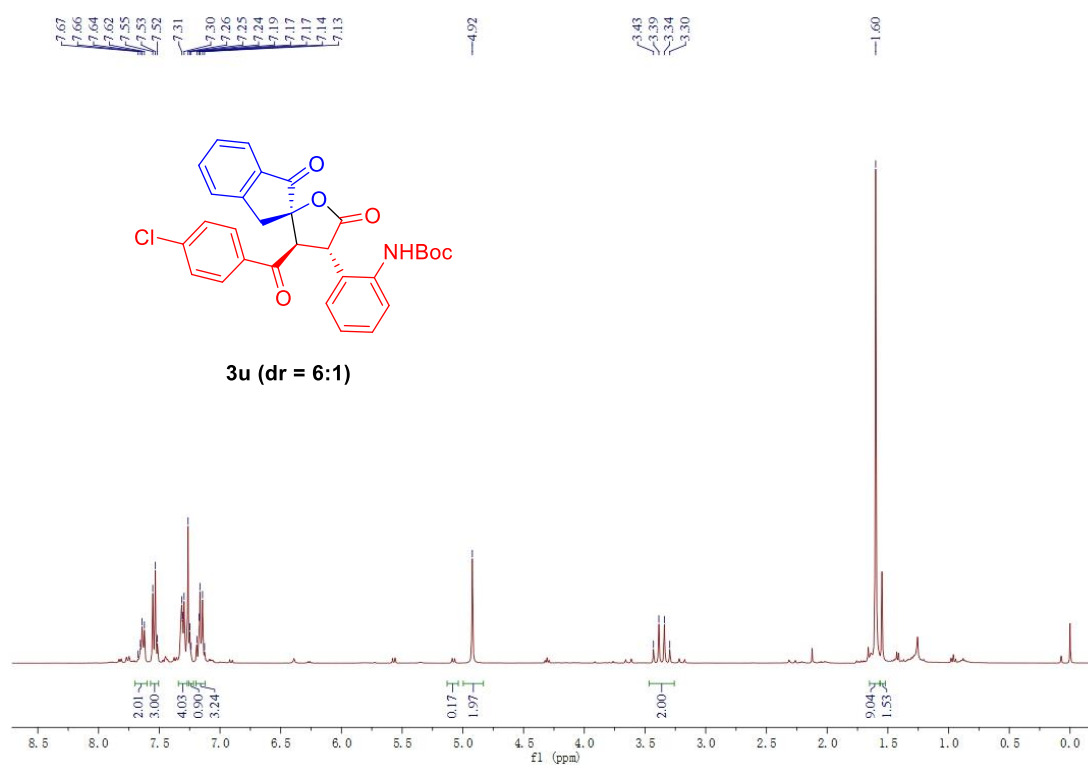

**<sup>13</sup>C NMR (101 MHz, CDCl<sub>3</sub>)**

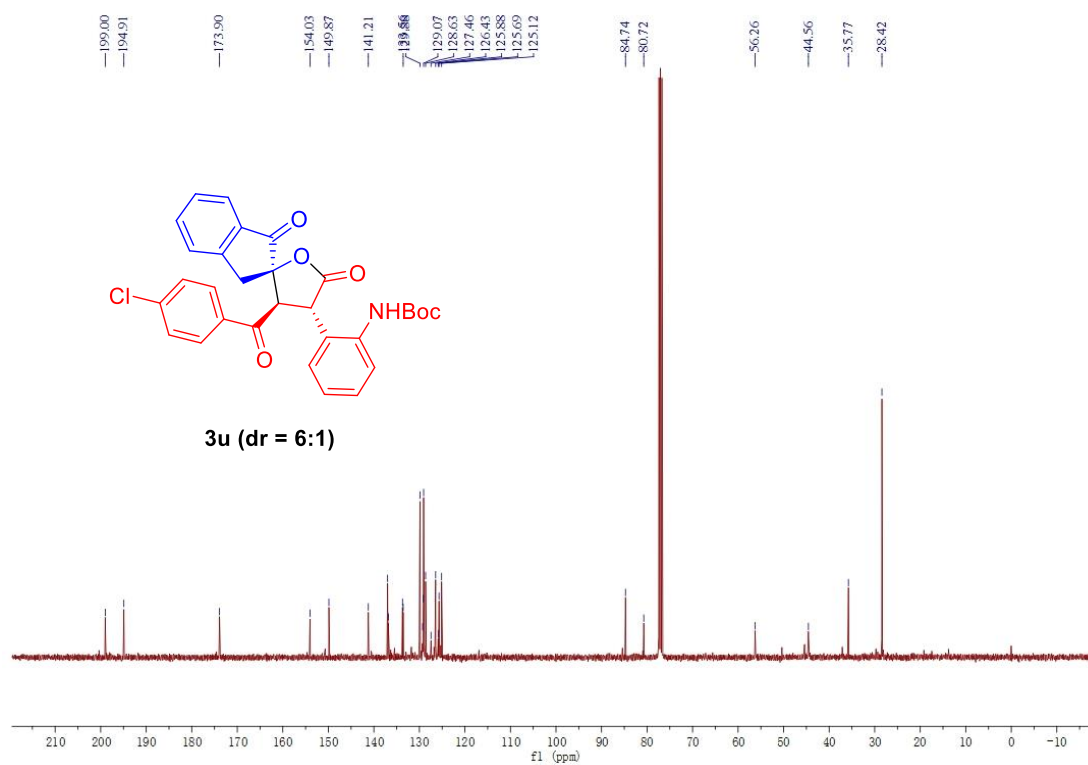

**<sup>1</sup>H NMR (400 MHz, CDCl<sub>3</sub>)**

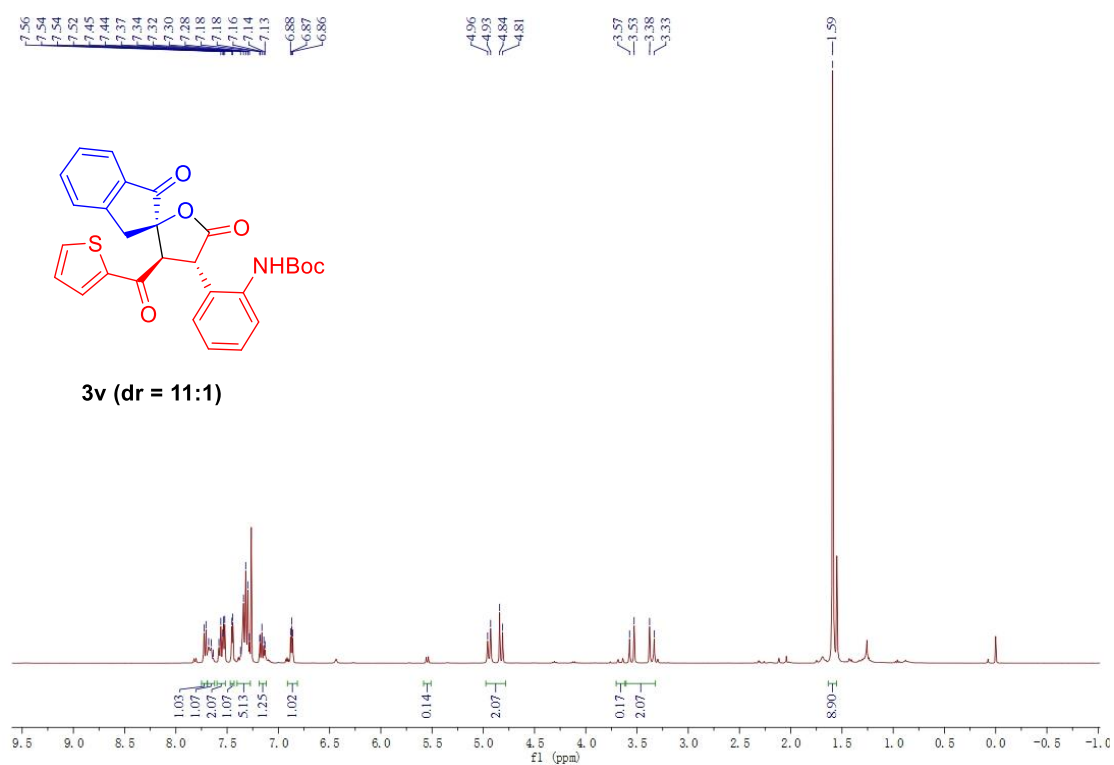

**<sup>13</sup>C NMR (101 MHz, CDCl<sub>3</sub>)**

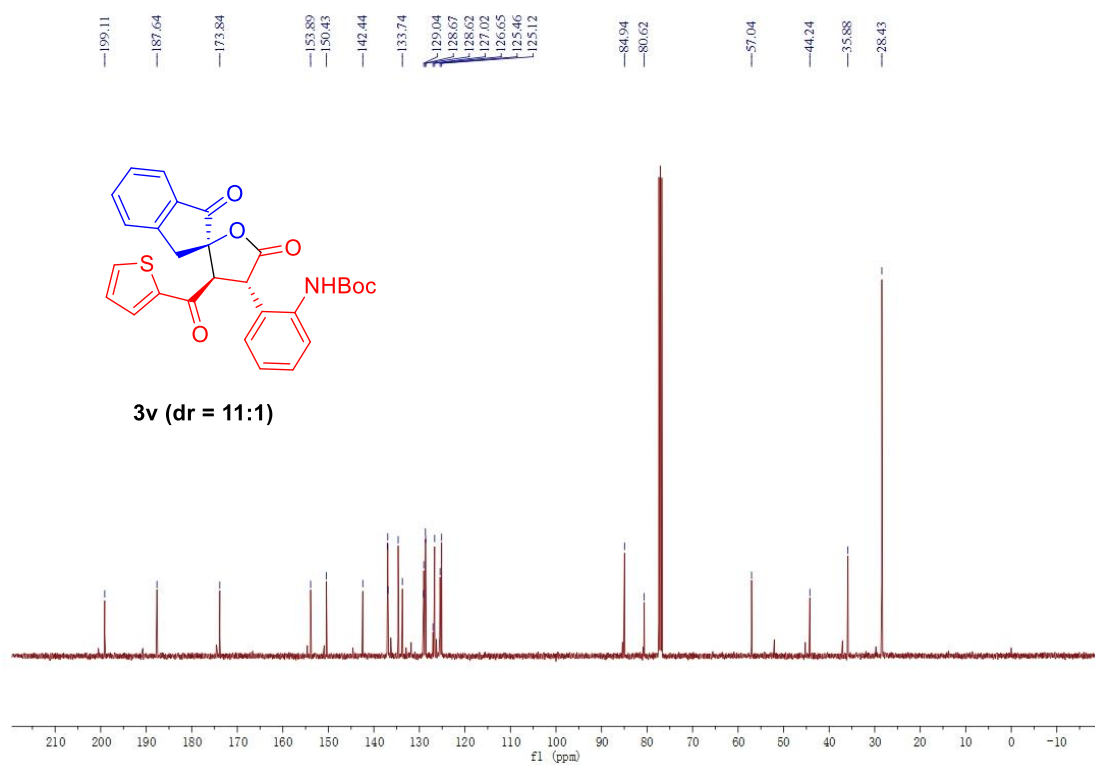

**<sup>1</sup>H NMR (400 MHz, CDCl<sub>3</sub>)**

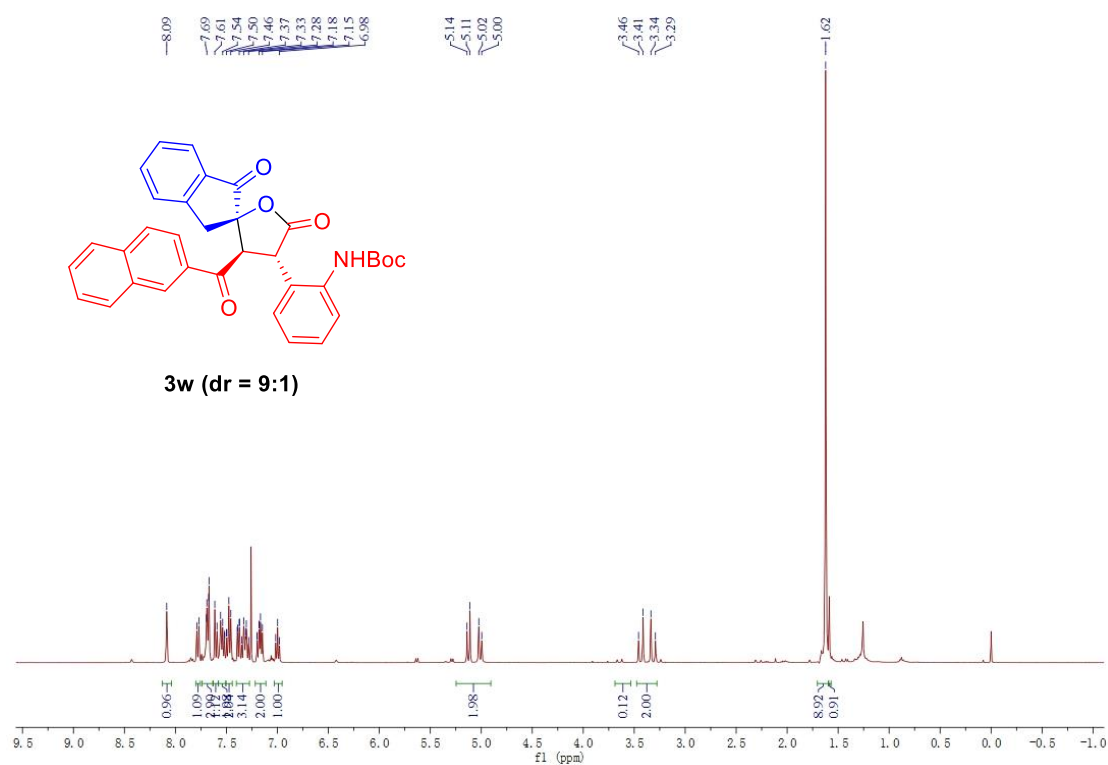

**<sup>13</sup>C NMR (101 MHz, CDCl<sub>3</sub>)**

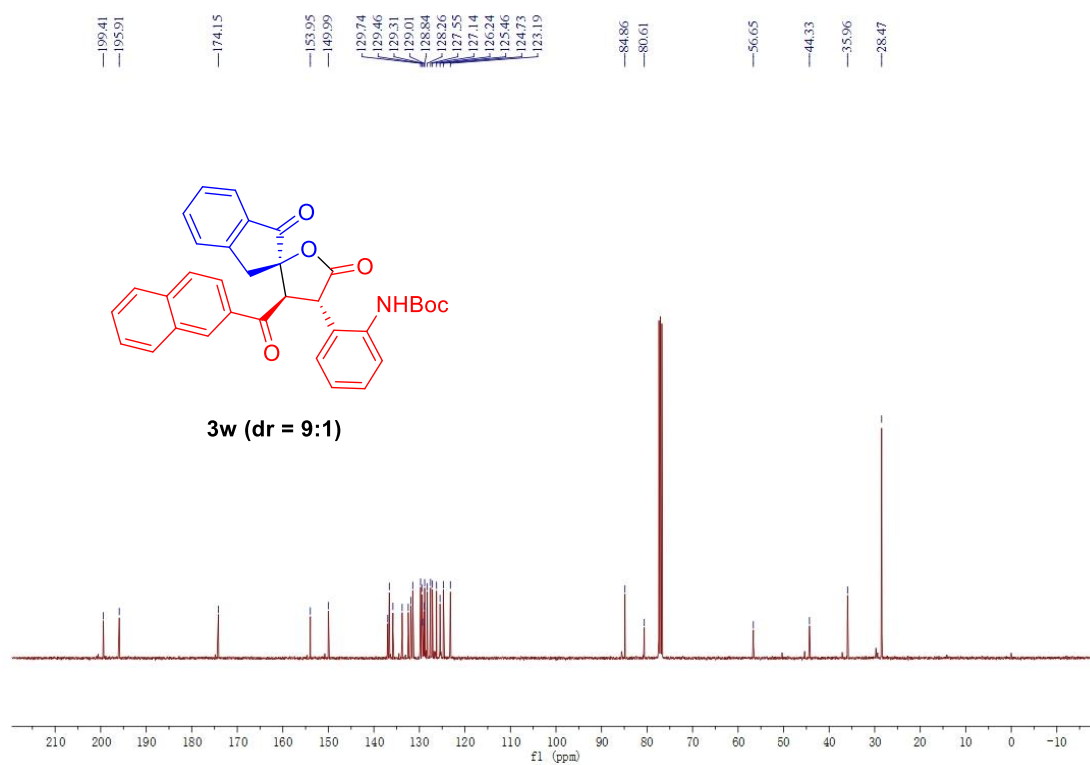

**<sup>1</sup>H NMR (400 MHz, CDCl<sub>3</sub>)**

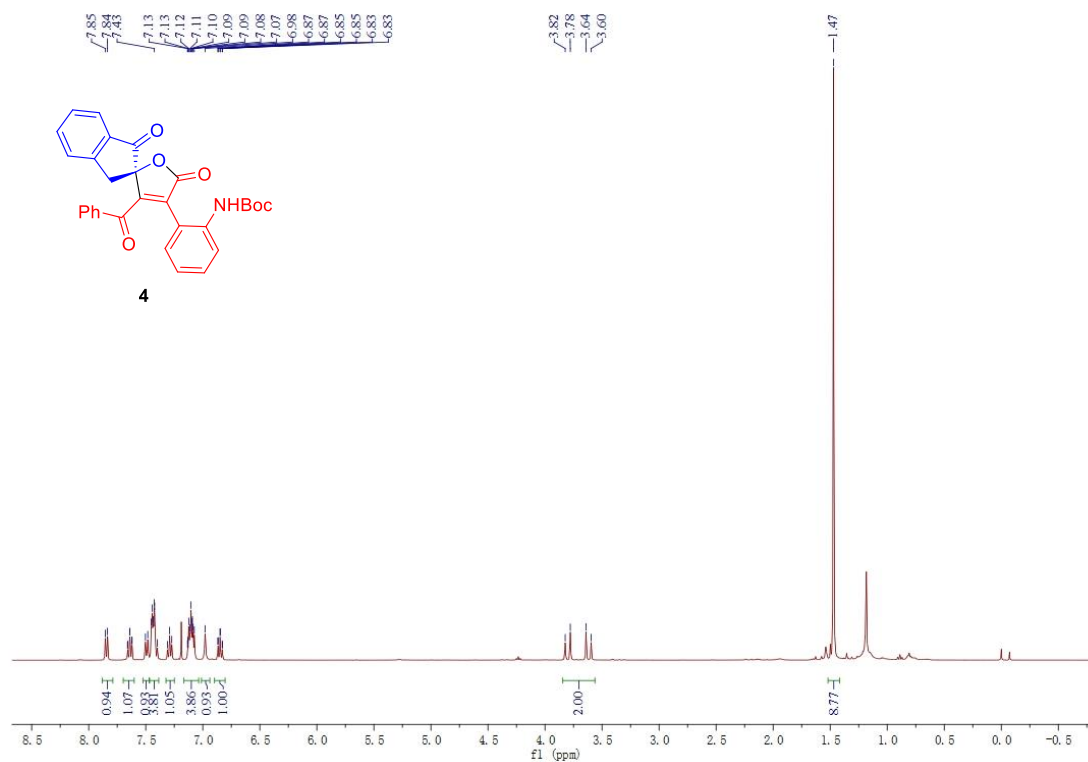

**<sup>13</sup>C NMR (101 MHz, CDCl<sub>3</sub>)**

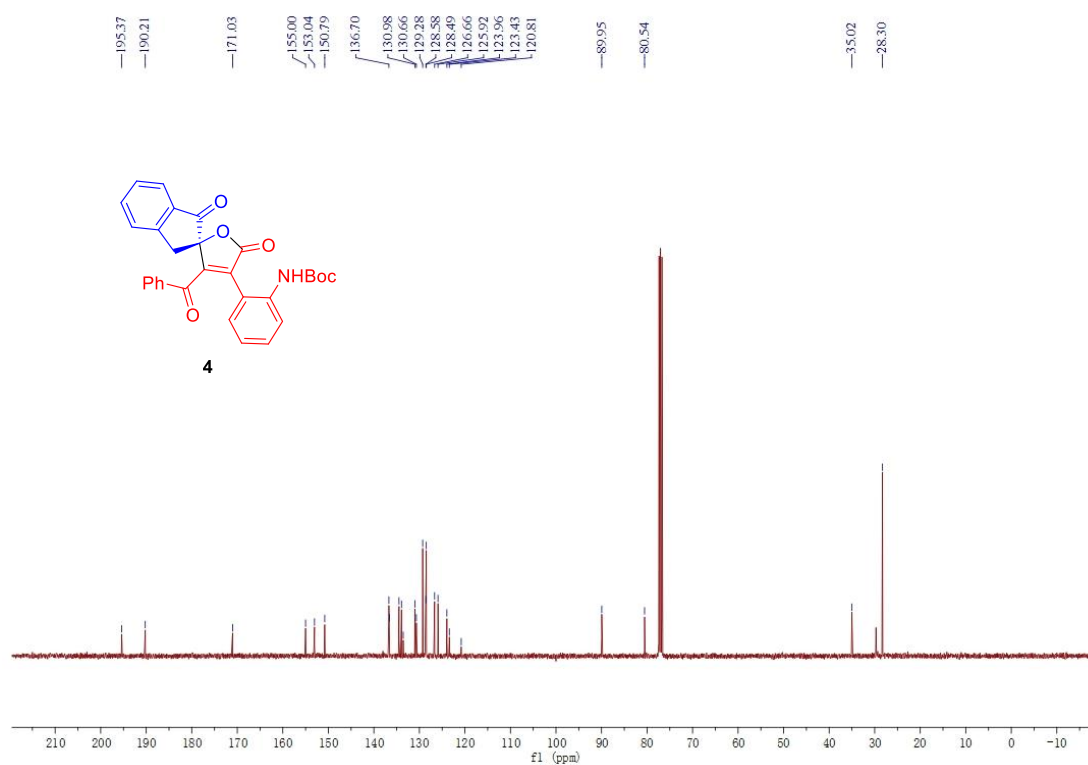

**<sup>1</sup>H NMR (400 MHz, CDCl<sub>3</sub>)**

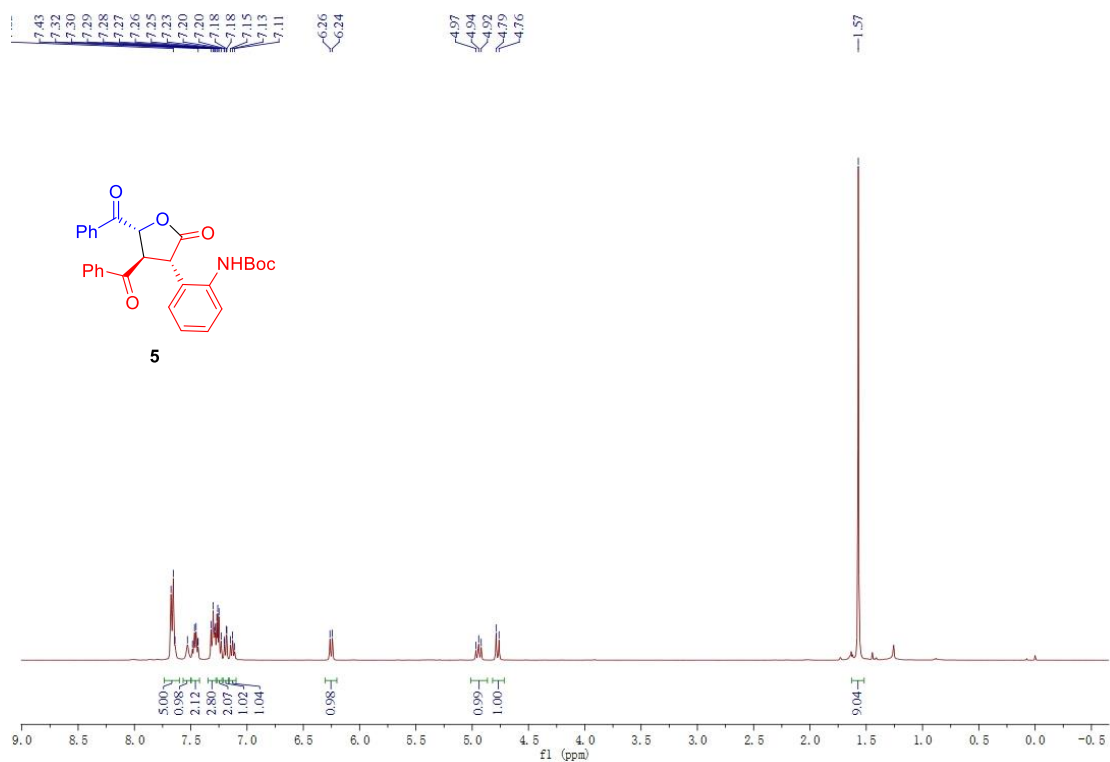

**<sup>13</sup>C NMR (101 MHz, CDCl<sub>3</sub>)**

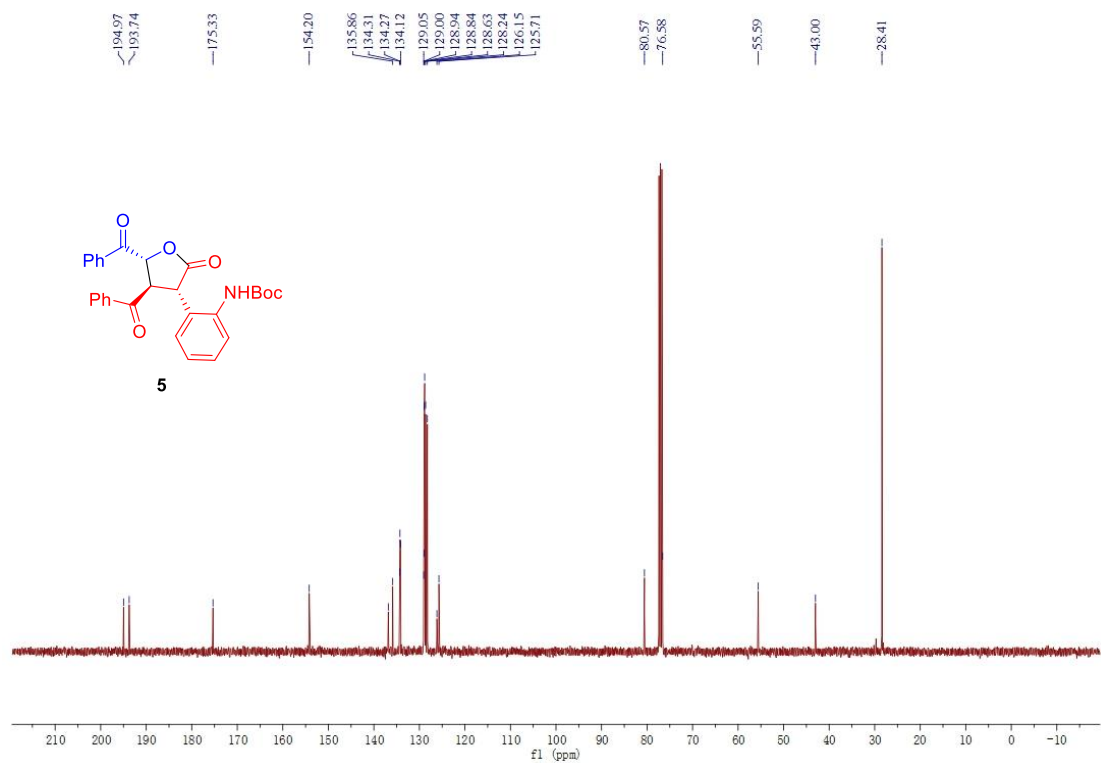

**<sup>1</sup>H NMR (400 MHz, CDCl<sub>3</sub>)**

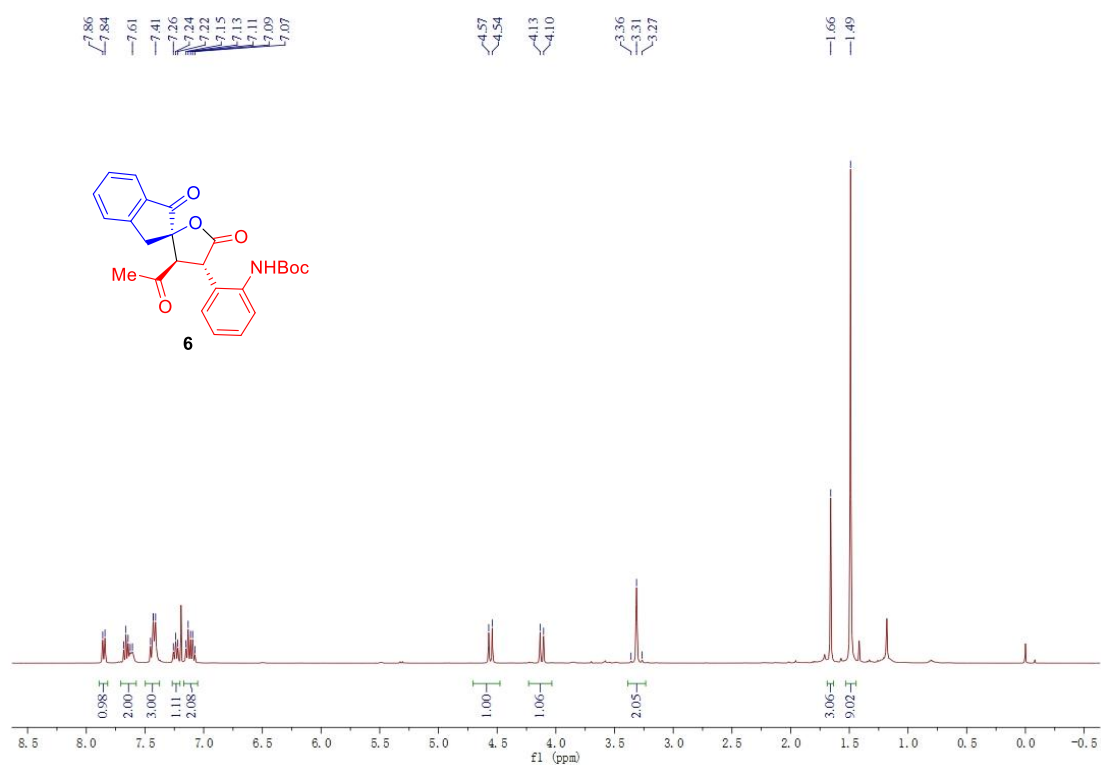

**<sup>13</sup>C NMR (101 MHz, CDCl<sub>3</sub>)**

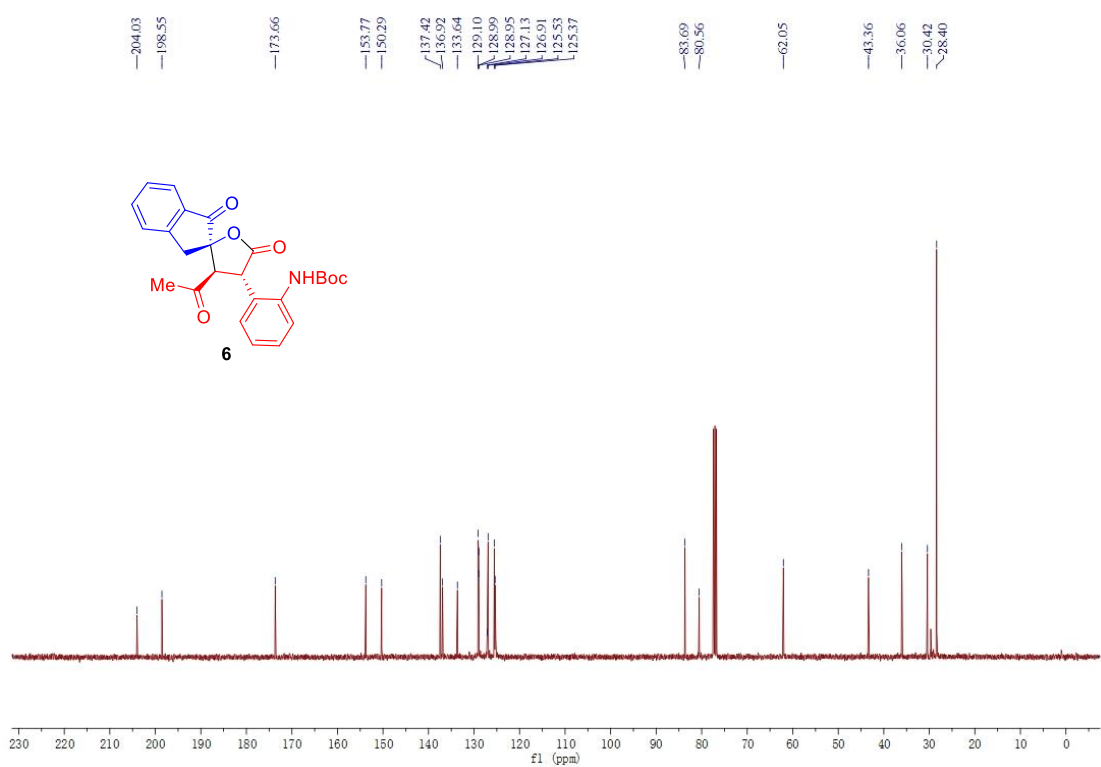

**<sup>1</sup>H NMR (400 MHz, CDCl<sub>3</sub>)**

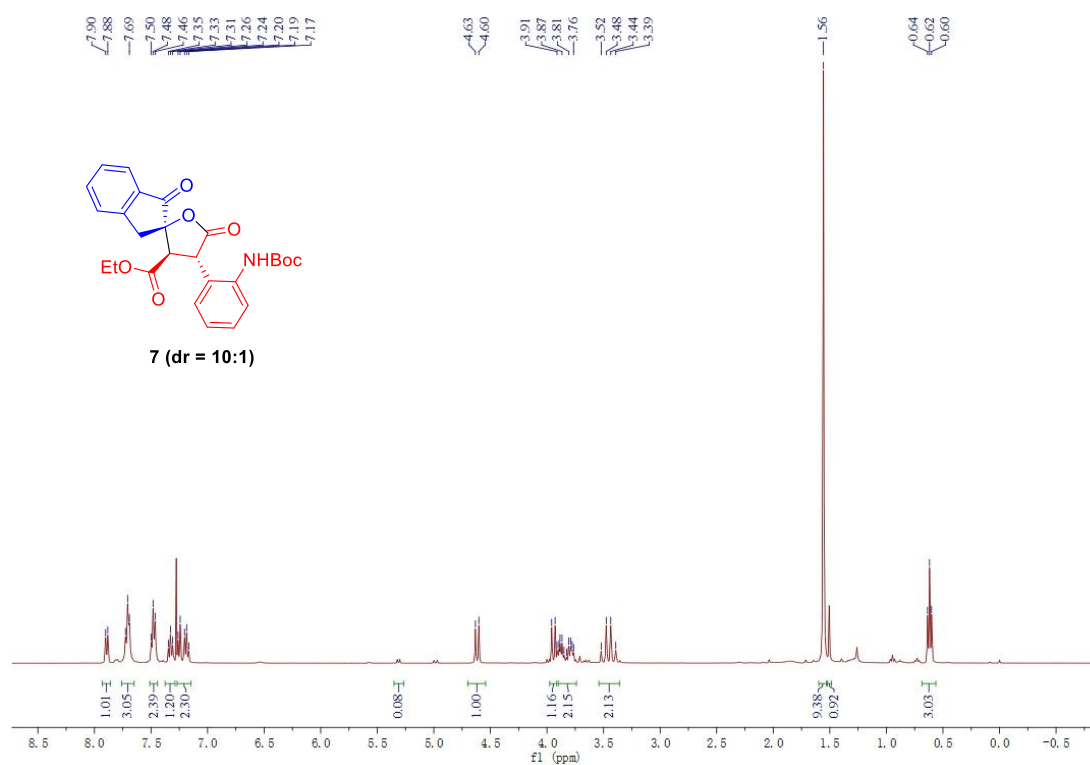

**<sup>13</sup>C NMR (101 MHz, CDCl<sub>3</sub>)**

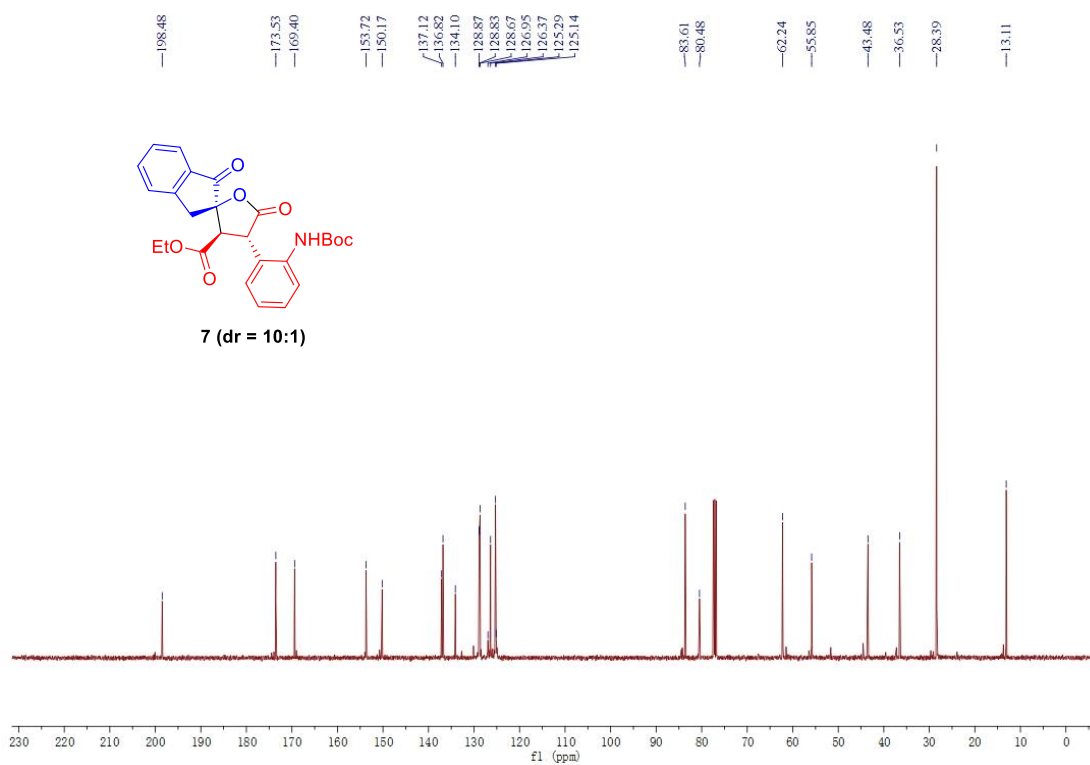

**<sup>1</sup>H NMR (400 MHz, CDCl<sub>3</sub>)**

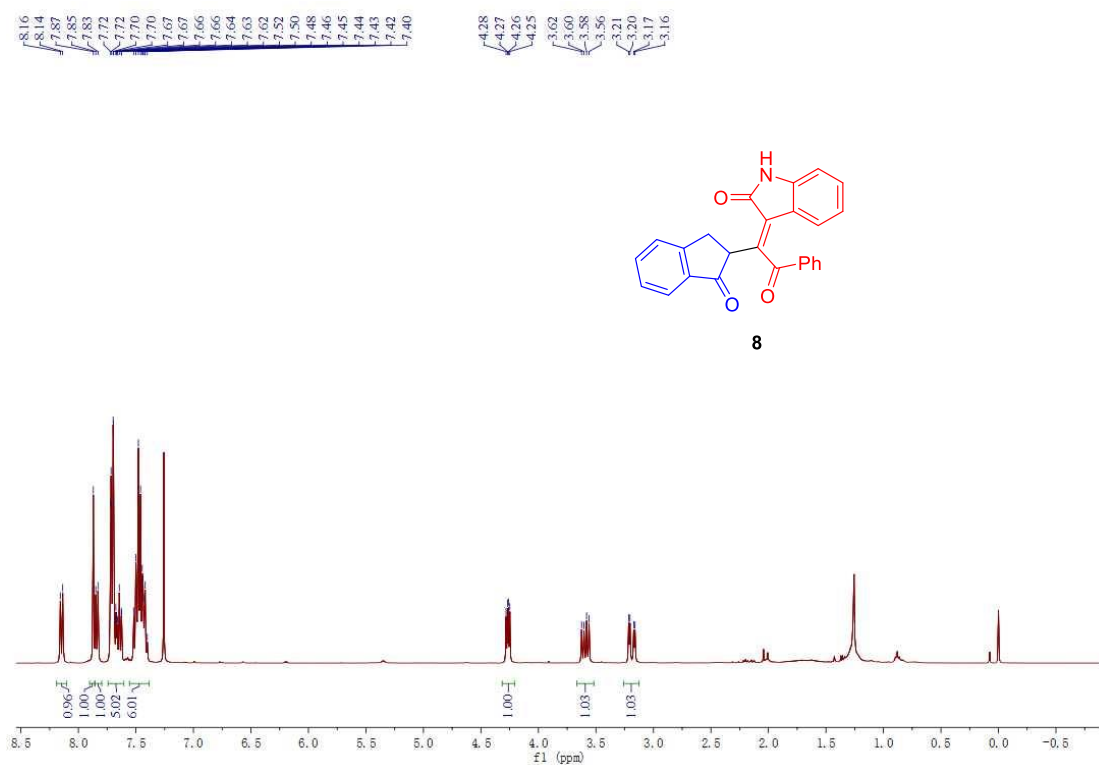

**<sup>13</sup>C NMR (101 MHz, CDCl<sub>3</sub>)**

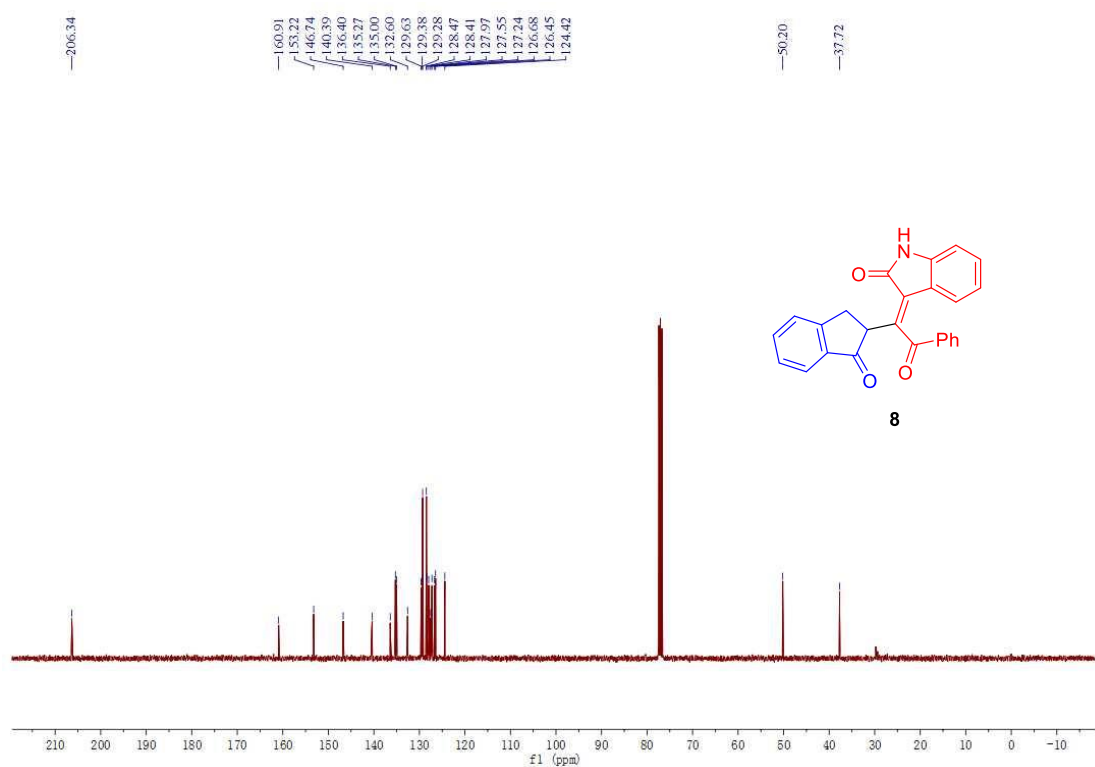

## HPLC spectra of compounds

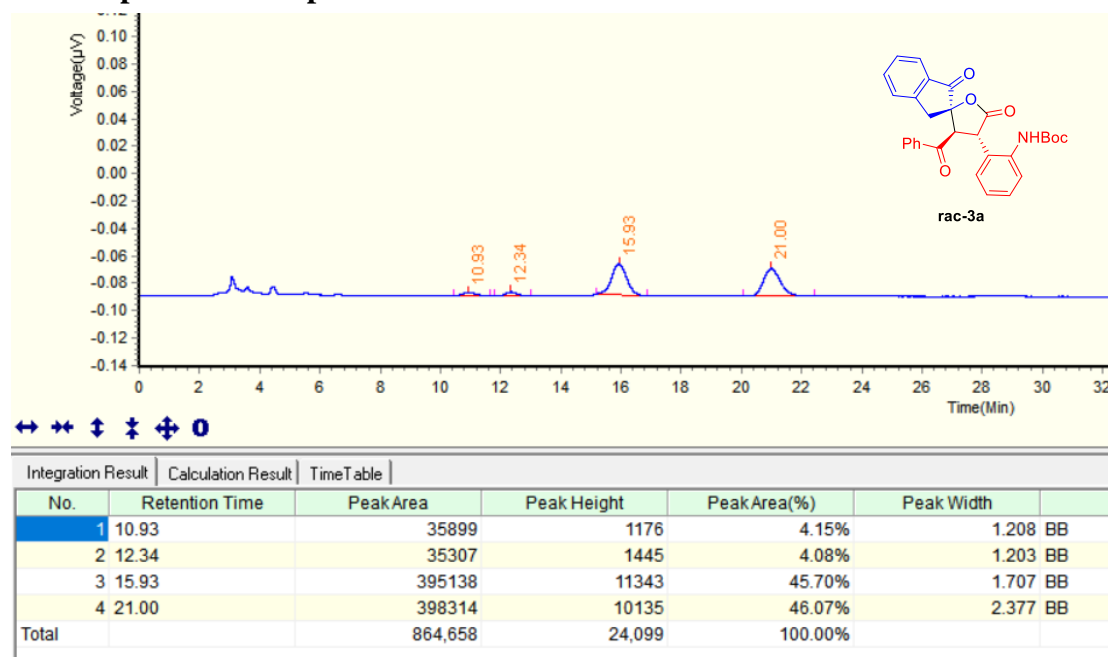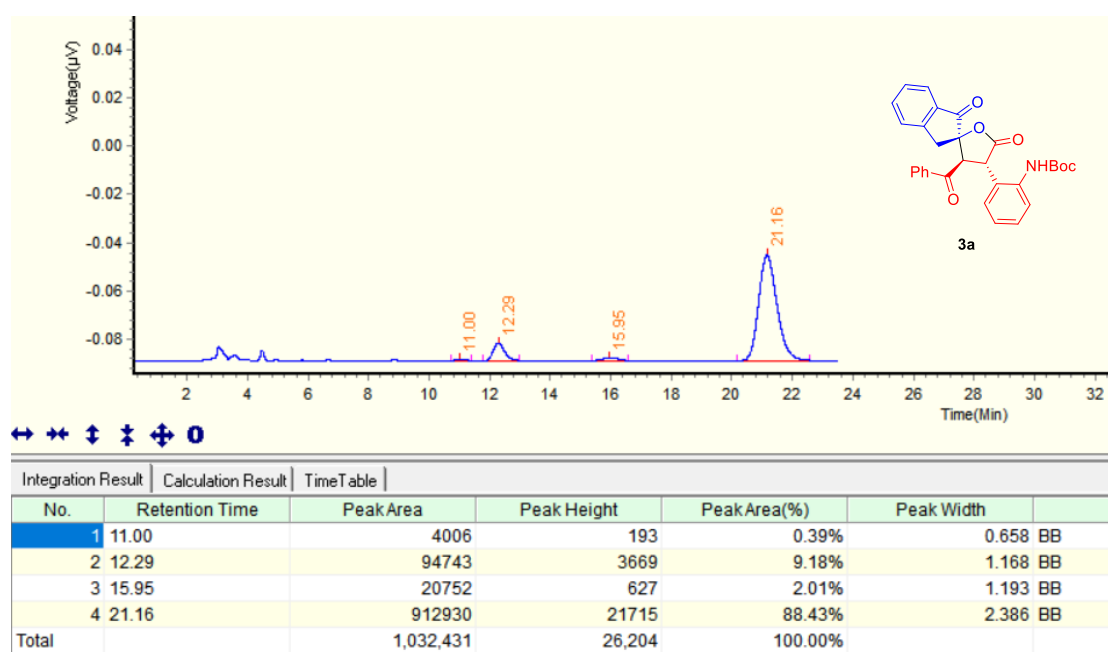

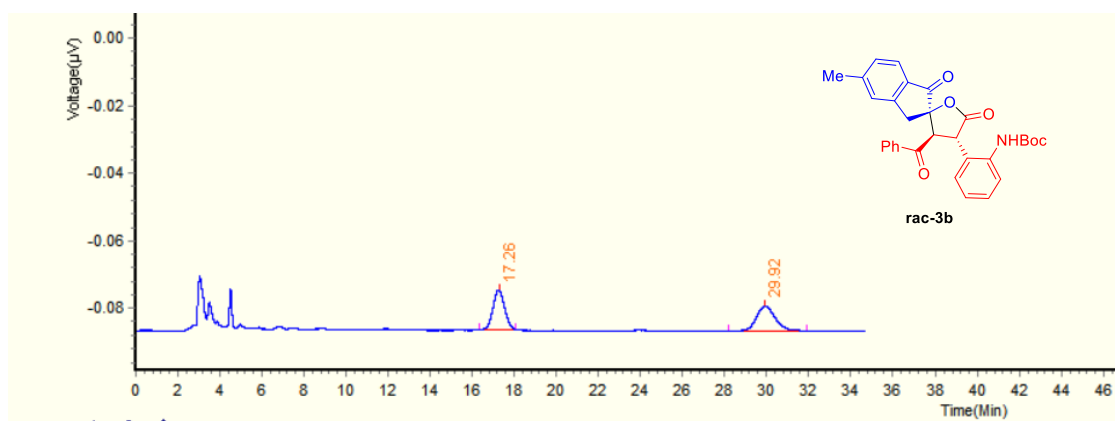

| Integration Result   Calculation Result   TimeTable |                |           |             |             |            |    |
|-----------------------------------------------------|----------------|-----------|-------------|-------------|------------|----|
| No.                                                 | Retention Time | Peak Area | Peak Height | PeakArea(%) | Peak Width |    |
| 1                                                   | 17.26          | 220606    | 5860        | 50.11%      | 1.725      | BB |
| 2                                                   | 29.92          | 219648    | 3628        | 49.89%      | 3.739      | BB |
| Total                                               |                | 440,254   | 9,488       | 100.00%     |            |    |

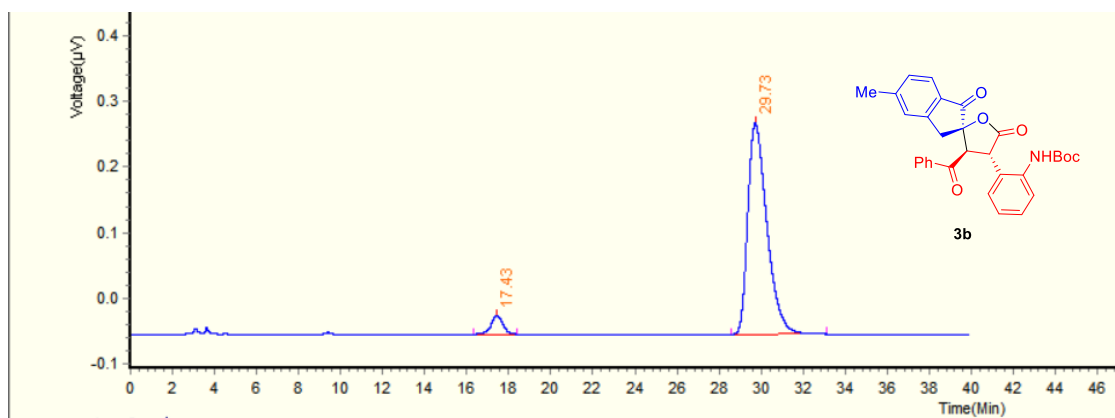

| Integration Result   Calculation Result   TimeTable |                |            |             |             |            |    |
|-----------------------------------------------------|----------------|------------|-------------|-------------|------------|----|
| No.                                                 | Retention Time | Peak Area  | Peak Height | PeakArea(%) | Peak Width |    |
| 1                                                   | 17.43          | 546885     | 14076       | 5.11%       | 2.028      | BB |
| 2                                                   | 29.73          | 10161298   | 160430      | 94.89%      | 4.552      | BB |
| Total                                               |                | 10,708,183 | 174,506     | 100.00%     |            |    |

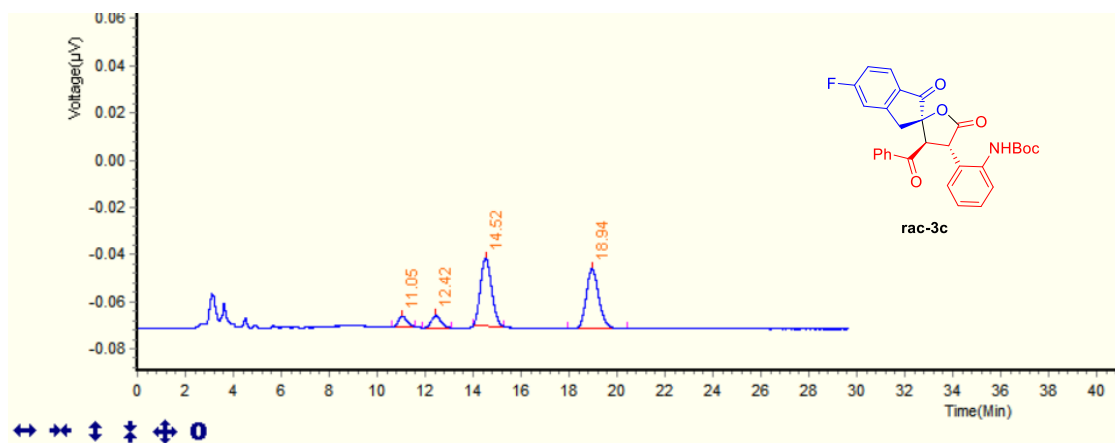

| Integration Result   Calculation Result   TimeTable |                |           |             |             |            |    |
|-----------------------------------------------------|----------------|-----------|-------------|-------------|------------|----|
| No.                                                 | Retention Time | PeakArea  | Peak Height | PeakArea(%) | Peak Width |    |
| 1                                                   | 11.05          | 57370     | 2308        | 5.44%       | 0.984      | BB |
| 2                                                   | 12.42          | 69579     | 2588        | 6.59%       | 1.199      | BB |
| 3                                                   | 14.52          | 467101    | 14450       | 44.27%      | 1.292      | BB |
| 4                                                   | 18.94          | 461041    | 12631       | 43.70%      | 2.459      | BB |
| Total                                               |                | 1,055,091 | 31,977      | 100.00%     |            |    |

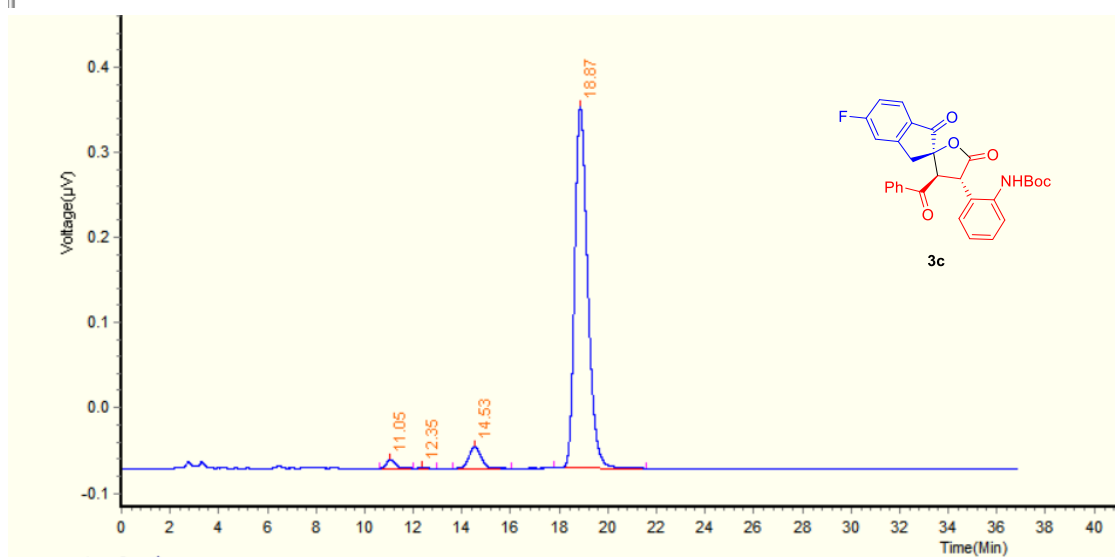

| Integration Result   Calculation Result   TimeTable |                |           |             |             |            |    |
|-----------------------------------------------------|----------------|-----------|-------------|-------------|------------|----|
| No.                                                 | Retention Time | PeakArea  | Peak Height | PeakArea(%) | Peak Width |    |
| 1                                                   | 11.05          | 132681    | 5186        | 1.58%       | 1.375      | BV |
| 2                                                   | 12.35          | 5810      | 245         | 0.07%       | 0.954      | VB |
| 3                                                   | 14.53          | 429239    | 12244       | 5.11%       | 2.407      | BB |
| 4                                                   | 18.87          | 7833922   | 212194      | 93.24%      | 3.82       | BB |
| Total                                               |                | 8,401,652 | 229,869     | 100.00%     |            |    |

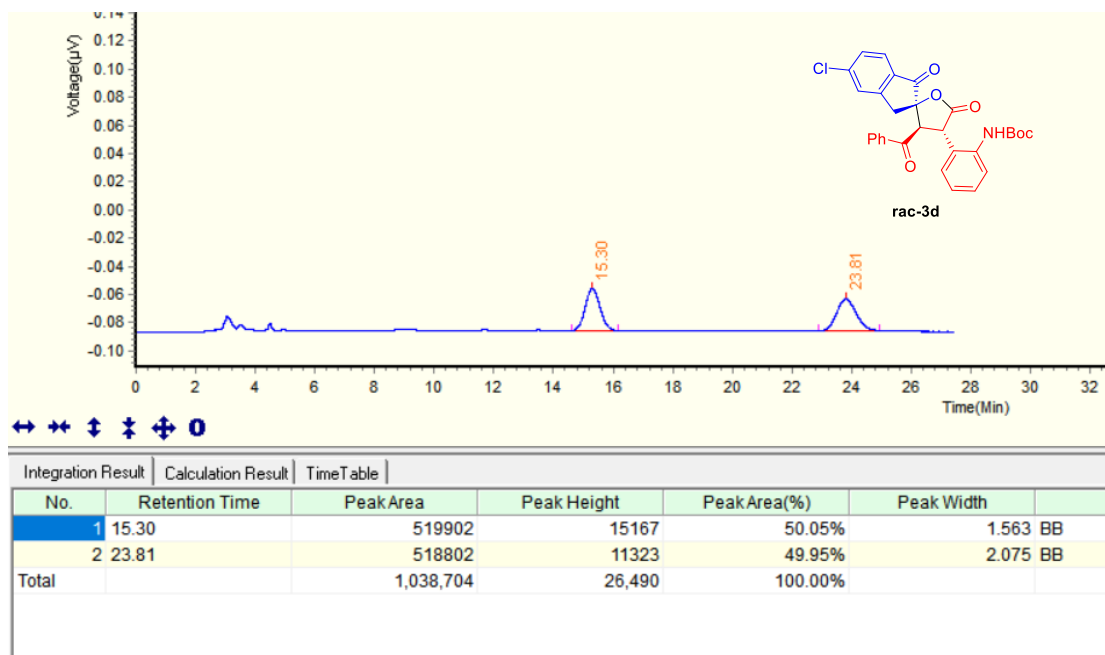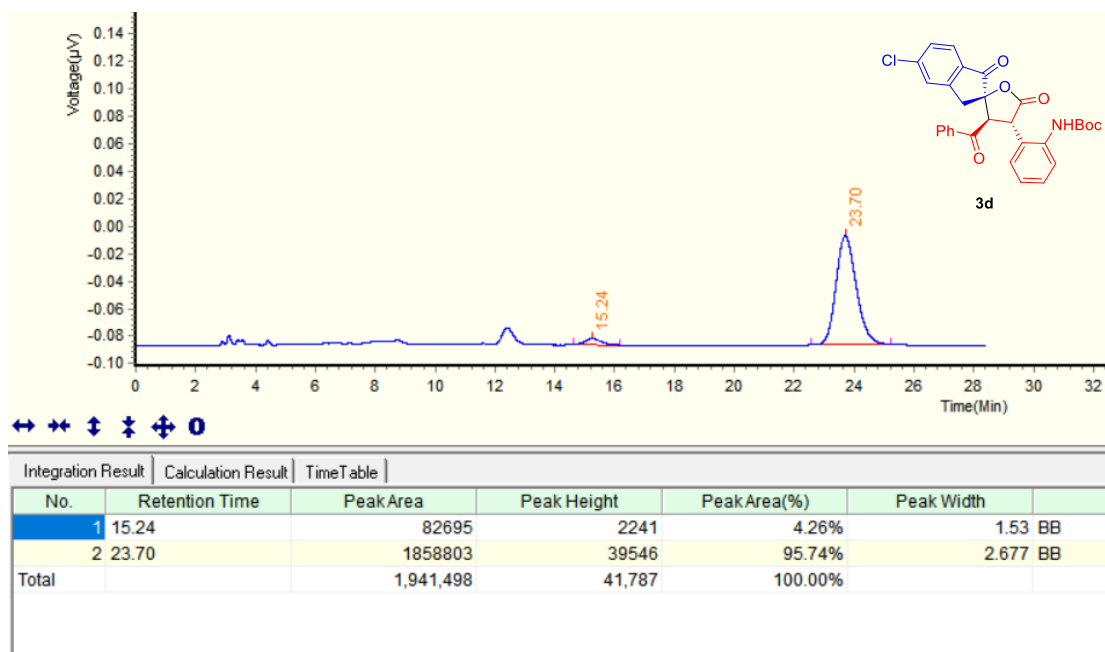

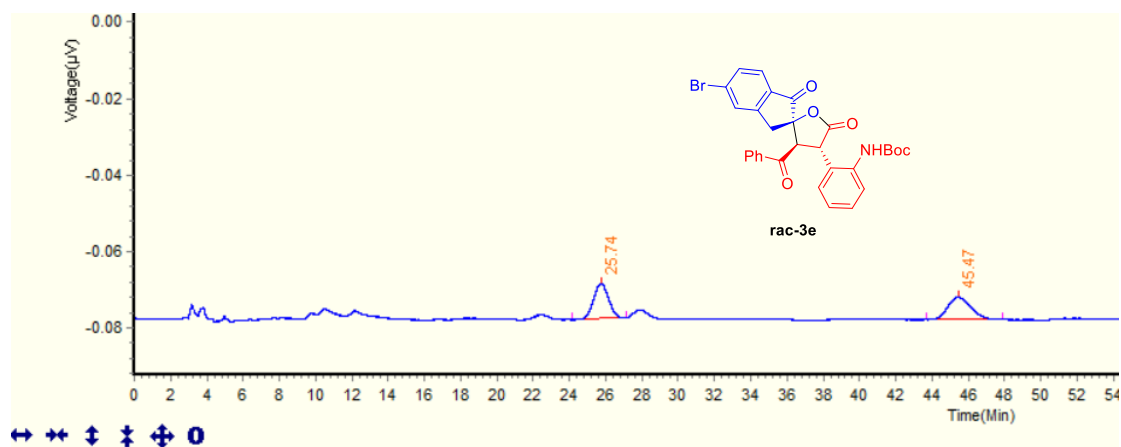

| Integration Result |                | Calculation Result | TimeTable   |             |            |    |
|--------------------|----------------|--------------------|-------------|-------------|------------|----|
| No.                | Retention Time | PeakArea           | Peak Height | PeakArea(%) | Peak Width |    |
| 1                  | 25.74          | 263785             | 4606        | 50.28%      | 2.945      | BB |
| 2                  | 45.47          | 260887             | 2938        | 49.72%      | 4.229      | BB |
| Total              |                | 524,672            | 7,544       | 100.00%     |            |    |

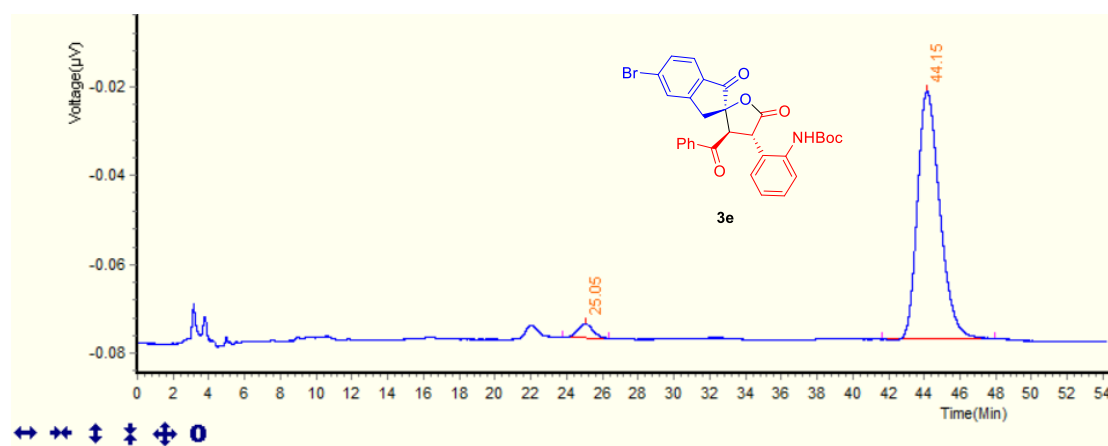

| Integration Result |                | Calculation Result | TimeTable   |             |            |    |
|--------------------|----------------|--------------------|-------------|-------------|------------|----|
| No.                | Retention Time | PeakArea           | Peak Height | PeakArea(%) | Peak Width |    |
| 1                  | 25.05          | 91393              | 1571        | 3.64%       | 2.639      | BB |
| 2                  | 44.15          | 2418425            | 27904       | 96.36%      | 6.344      | BB |
| Total              |                | 2,509,818          | 29,475      | 100.00%     |            |    |

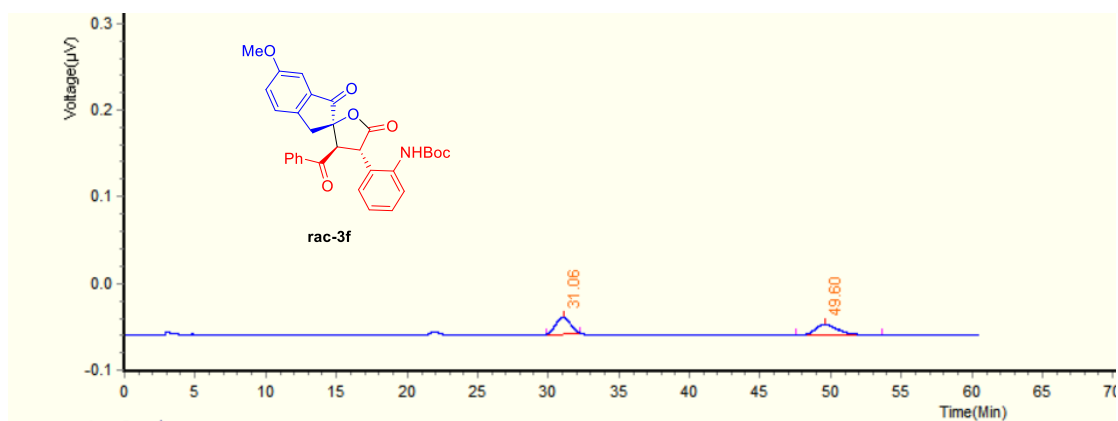

↔ \* ↑ ↓ ⊕ 0

| Integration Result |                | Calculation Result | TimeTable   |              |            |    |
|--------------------|----------------|--------------------|-------------|--------------|------------|----|
| No.                | Retention Time | Peak Area          | Peak Height | Peak Area(%) | Peak Width |    |
| 1                  | 31.06          | 681996             | 9273        | 50.31%       | 2.445      | BB |
| 2                  | 49.60          | 673534             | 5994        | 49.69%       | 6.144      | BB |
| Total              |                | 1,355,530          | 15,267      | 100.00%      |            |    |

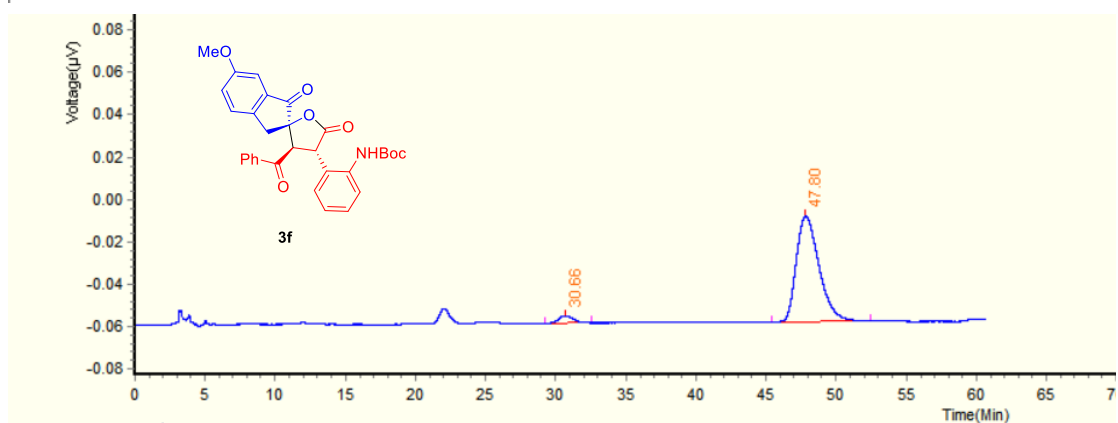

↔ \* ↑ ↓ ⊕ 0

| Integration Result |                | Calculation Result | TimeTable   |              |            |    |
|--------------------|----------------|--------------------|-------------|--------------|------------|----|
| No.                | Retention Time | Peak Area          | Peak Height | Peak Area(%) | Peak Width |    |
| 1                  | 30.66          | 127520             | 1721        | 4.36%        | 3.333      | BB |
| 2                  | 47.80          | 2794709            | 24796       | 95.64%       | 6.981      | BB |
| Total              |                | 2,922,229          | 26,517      | 100.00%      |            |    |

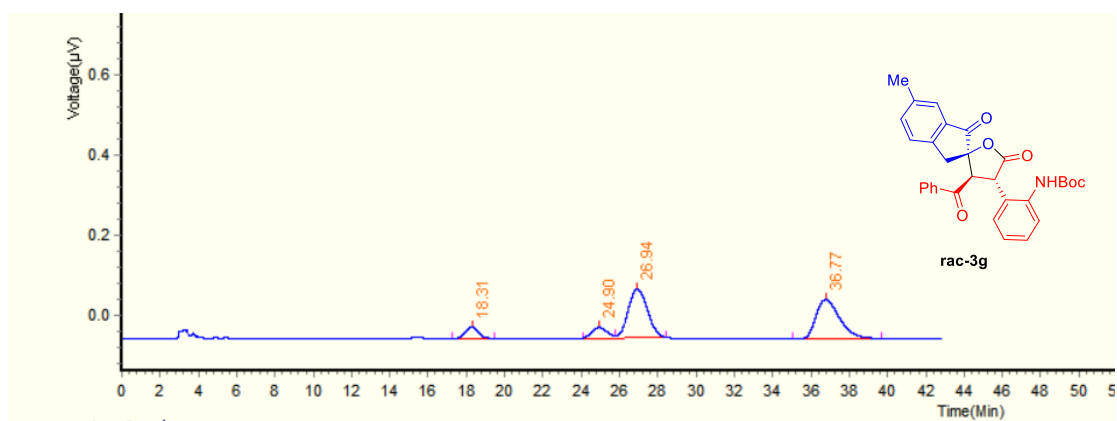

↔ \*\* ↑ ↓ ⊕ ⊖ 0

| Integration Result |                | Calculation Result | TimeTable   |             |            |    |
|--------------------|----------------|--------------------|-------------|-------------|------------|----|
| No.                | Retention Time | PeakArea           | Peak Height | PeakArea(%) | Peak Width |    |
| 1                  | 18.31          | 661936             | 14690       | 6.80%       | 2.174      | BB |
| 2                  | 24.90          | 720978             | 12940       | 7.40%       | 1.685      | BV |
| 3                  | 26.94          | 4186376            | 60281       | 43.00%      | 2.663      | VB |
| 4                  | 36.77          | 4167107            | 48713       | 42.80%      | 4.659      | BB |
| Total              |                | 9,736,397          | 136,624     | 100.00%     |            |    |

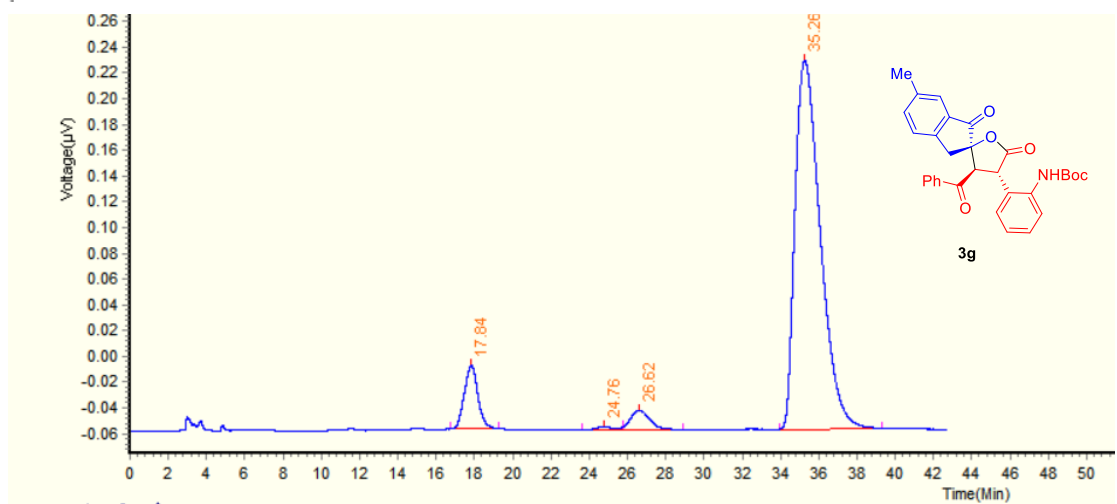

↔ \*\* ↑ ↓ ⊕ ⊖ 0

| Integration Result |                | Calculation Result | TimeTable   |             |            |    |
|--------------------|----------------|--------------------|-------------|-------------|------------|----|
| No.                | Retention Time | PeakArea           | Peak Height | PeakArea(%) | Peak Width |    |
| 1                  | 17.84          | 1218831            | 24647       | 8.14%       | 2.522      | BB |
| 2                  | 24.76          | 83713              | 1194        | 0.56%       | 2.123      | BV |
| 3                  | 26.62          | 531627             | 7530        | 3.55%       | 3.142      | VB |
| 4                  | 35.26          | 13133310           | 142859      | 87.75%      | 5.397      | BB |
| Total              |                | 14,967,481         | 176,230     | 100.00%     |            |    |

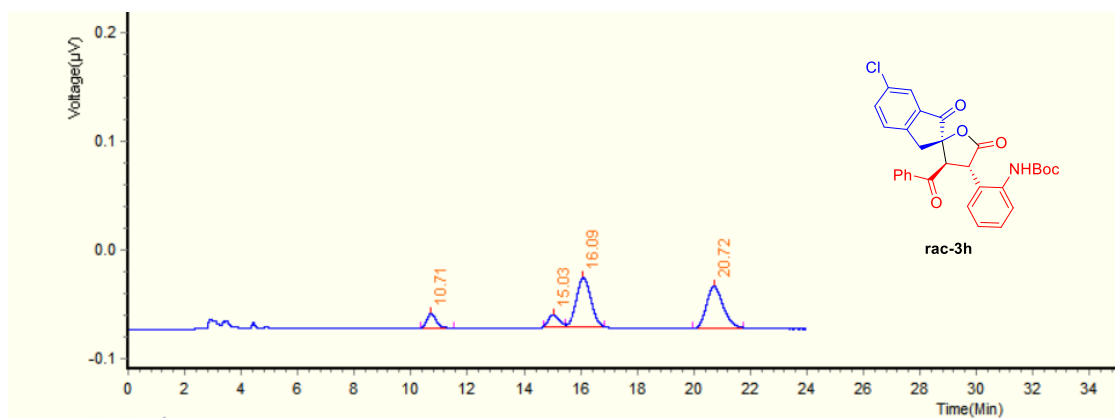

↔ \*\* ↑ ↓ + 0

| Integration Result |                |           |             |              |            |    |
|--------------------|----------------|-----------|-------------|--------------|------------|----|
| Calculation Result |                | TimeTable |             |              |            |    |
| No.                | Retention Time | Peak Area | Peak Height | Peak Area(%) | Peak Width |    |
| 1                  | 10.71          | 165683    | 6810        | 8.78%        | 1.184      | BB |
| 2                  | 15.03          | 138725    | 5212        | 7.35%        | 0.785      | BV |
| 3                  | 16.09          | 802525    | 22520       | 42.51%       | 1.386      | VB |
| 4                  | 20.72          | 780879    | 19178       | 41.36%       | 1.802      | BB |
| Total              |                | 1,887,812 | 53,720      | 100.00%      |            |    |

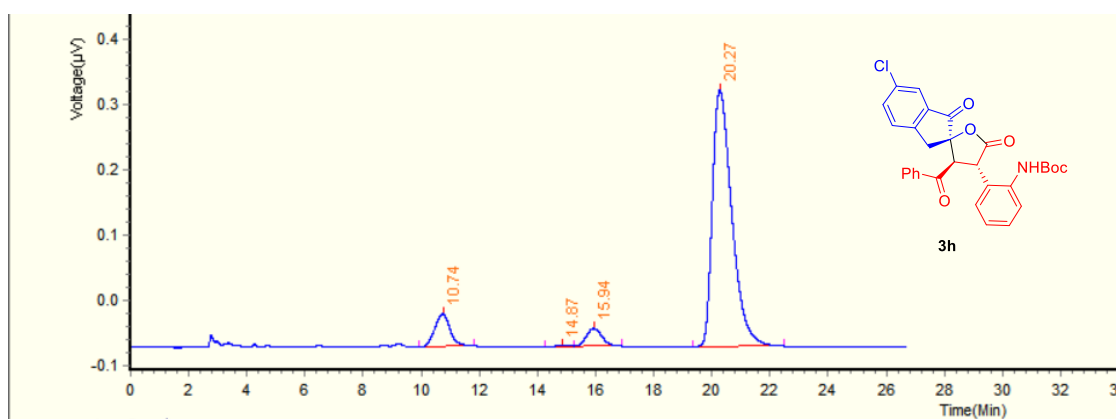

↔ \*\* ↑ ↓ + 0

| Integration Result |                |            |             |              |            |    |
|--------------------|----------------|------------|-------------|--------------|------------|----|
| Calculation Result |                | TimeTable  |             |              |            |    |
| No.                | Retention Time | Peak Area  | Peak Height | Peak Area(%) | Peak Width |    |
| 1                  | 10.74          | 908114     | 25082       | 8.57%        | 1.882      | BB |
| 2                  | 14.87          | 39141      | 1373        | 0.37%        | 0.995      | BV |
| 3                  | 15.94          | 517449     | 13716       | 4.88%        | 1.605      | VB |
| 4                  | 20.27          | 9130856    | 196962      | 86.18%       | 3.127      | BB |
| Total              |                | 10,595,560 | 237,133     | 100.00%      |            |    |

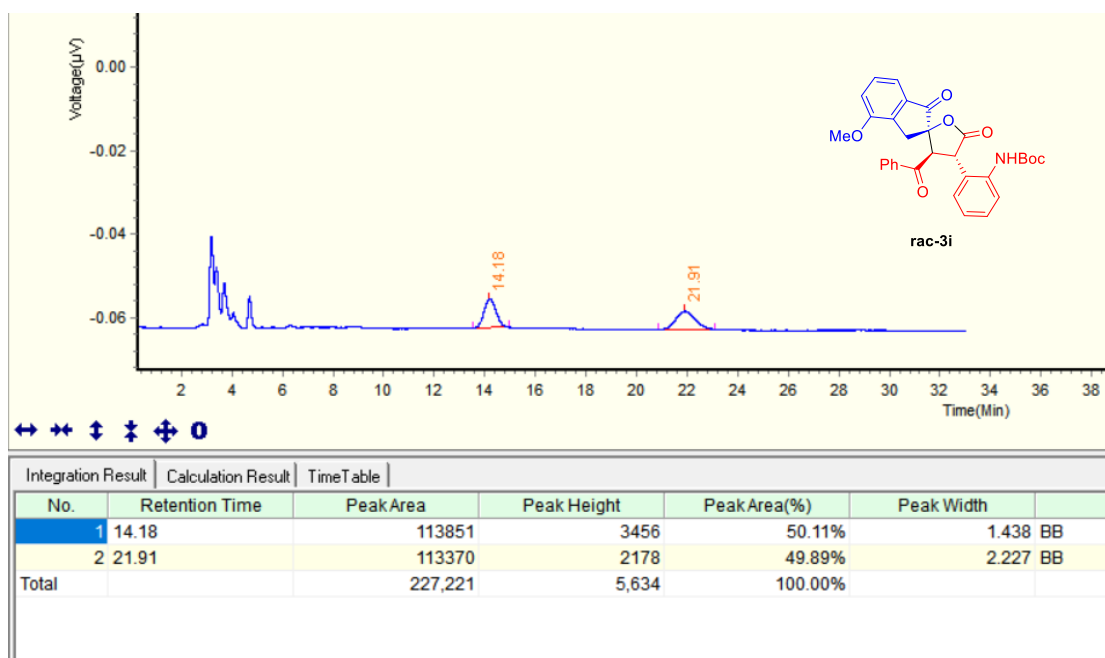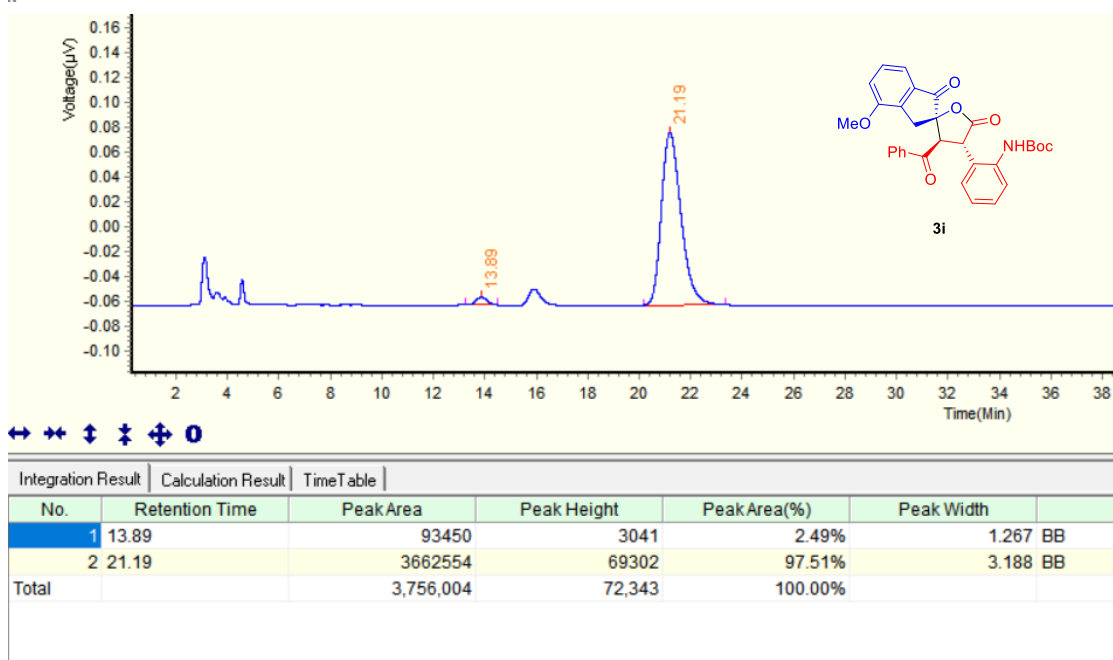

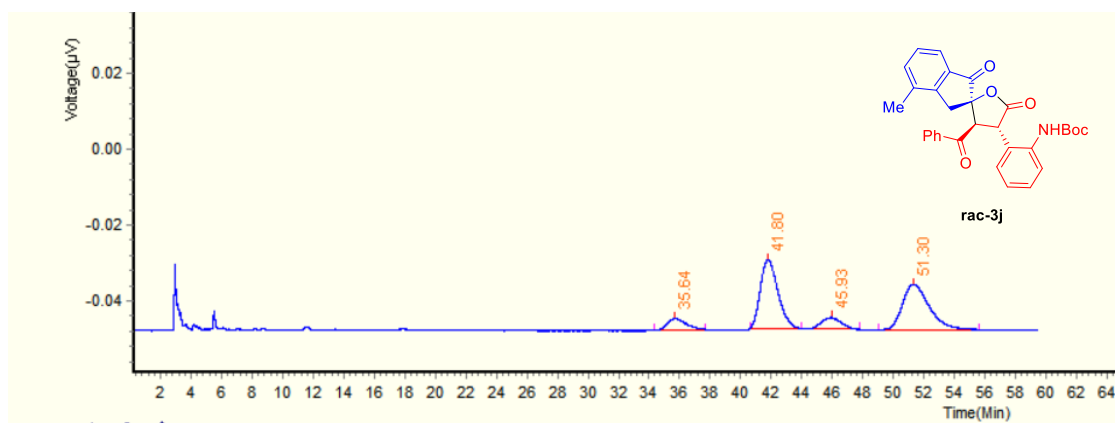

↔ \*\* ↑ ↓ ⊕ 0

| Integration Result |                | Calculation Result | TimeTable   |             |            |    |
|--------------------|----------------|--------------------|-------------|-------------|------------|----|
| No.                | Retention Time | PeakArea           | Peak Height | PeakArea(%) | Peak Width |    |
| 1                  | 35.64          | 128186             | 1495        | 7.50%       | 3.265      | BB |
| 2                  | 41.80          | 724649             | 9048        | 42.39%      | 3.327      | BV |
| 3                  | 45.93          | 133610             | 1498        | 7.82%       | 3.819      | VB |
| 4                  | 51.30          | 722954             | 5940        | 42.29%      | 6.592      | BB |
| Total              |                | 1,709,399          | 17,981      | 100.00%     |            |    |

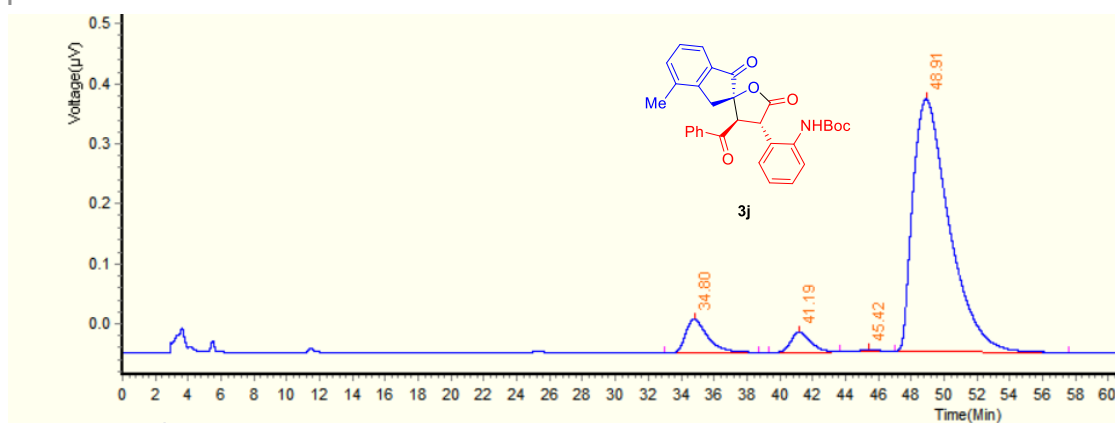

↔ \*\* ↑ ↓ ⊕ 0

| Integration Result |                | Calculation Result | TimeTable   |             |            |    |
|--------------------|----------------|--------------------|-------------|-------------|------------|----|
| No.                | Retention Time | PeakArea           | Peak Height | PeakArea(%) | Peak Width |    |
| 1                  | 34.80          | 2538715            | 27577       | 7.02%       | 5.693      | BB |
| 2                  | 41.19          | 1368276            | 16609       | 3.79%       | 4.336      | BV |
| 3                  | 48.91          | 32142677           | 209587      | 88.94%      | 10.586     | BB |
| 4                  | 45.42          | 90400              | 1419        | 0.25%       | 3.313      | VB |
| Total              |                | 36,140,068         | 255,192     | 100.00%     |            |    |

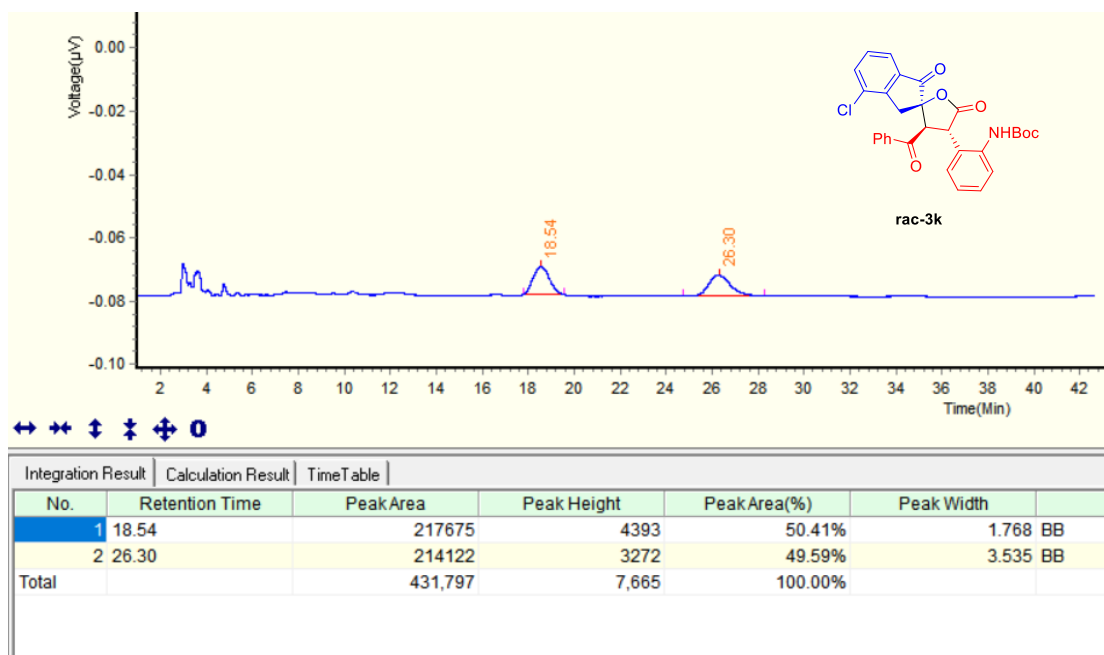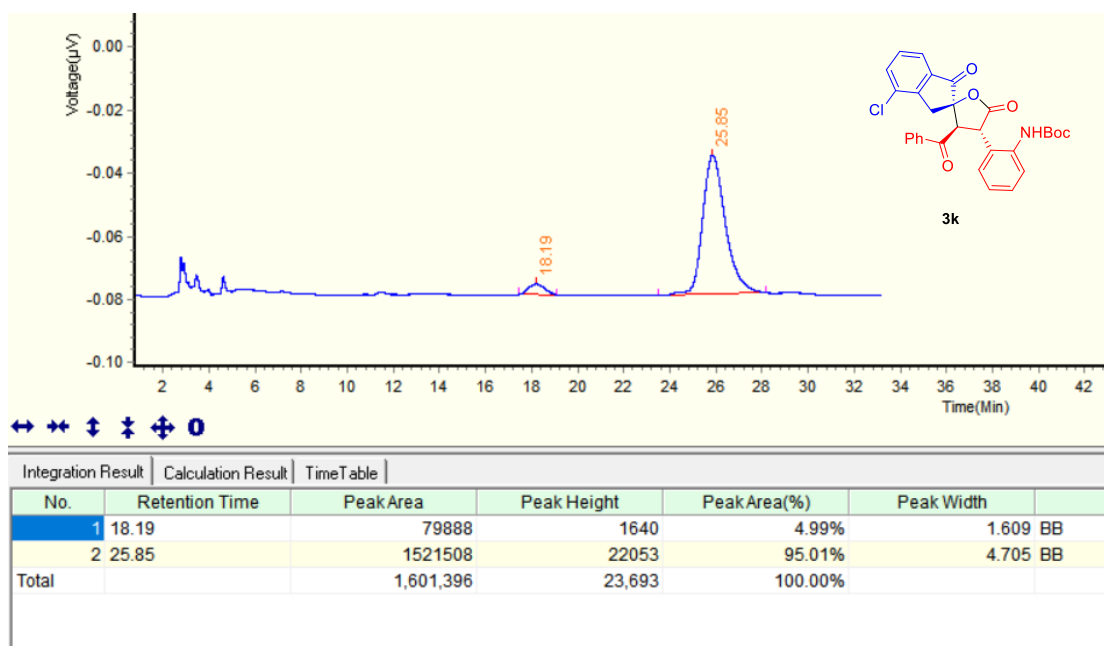

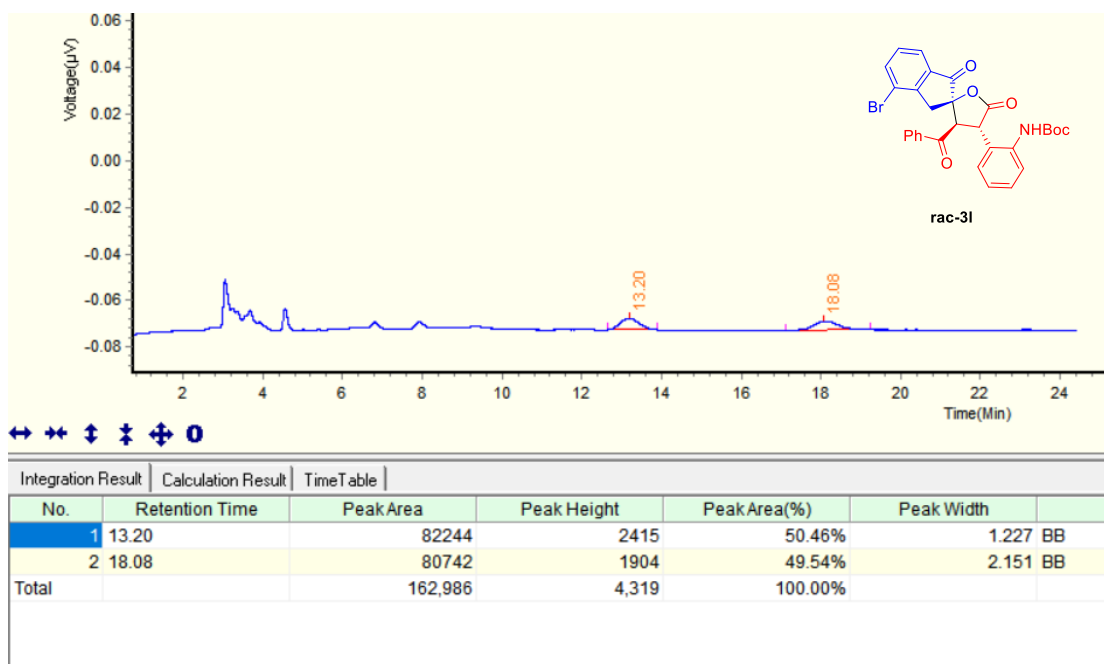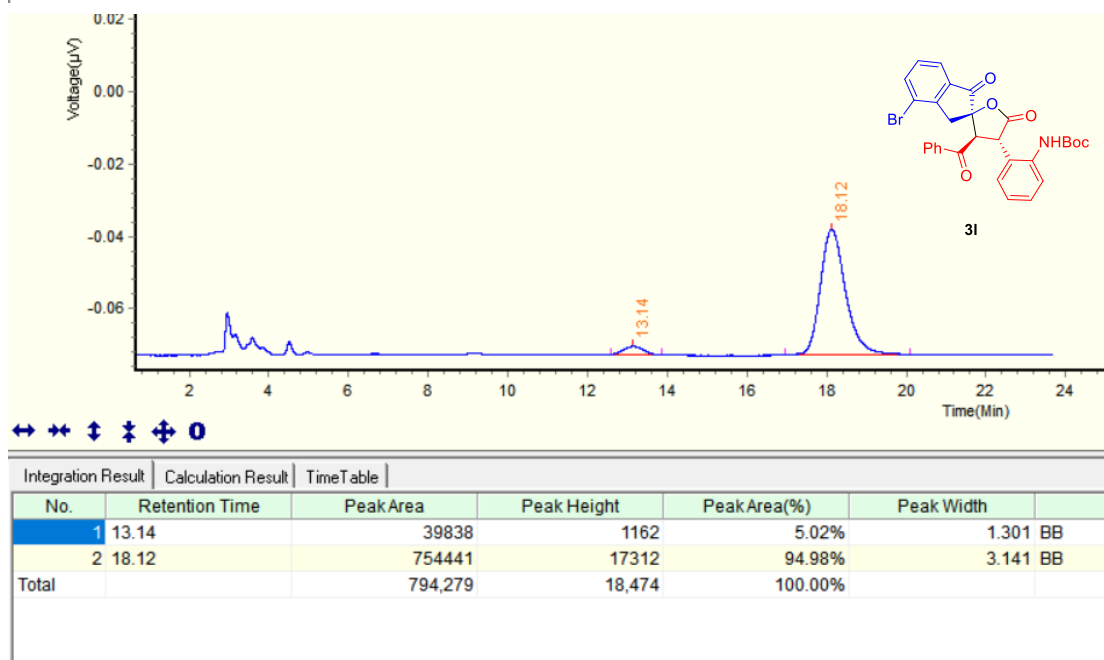

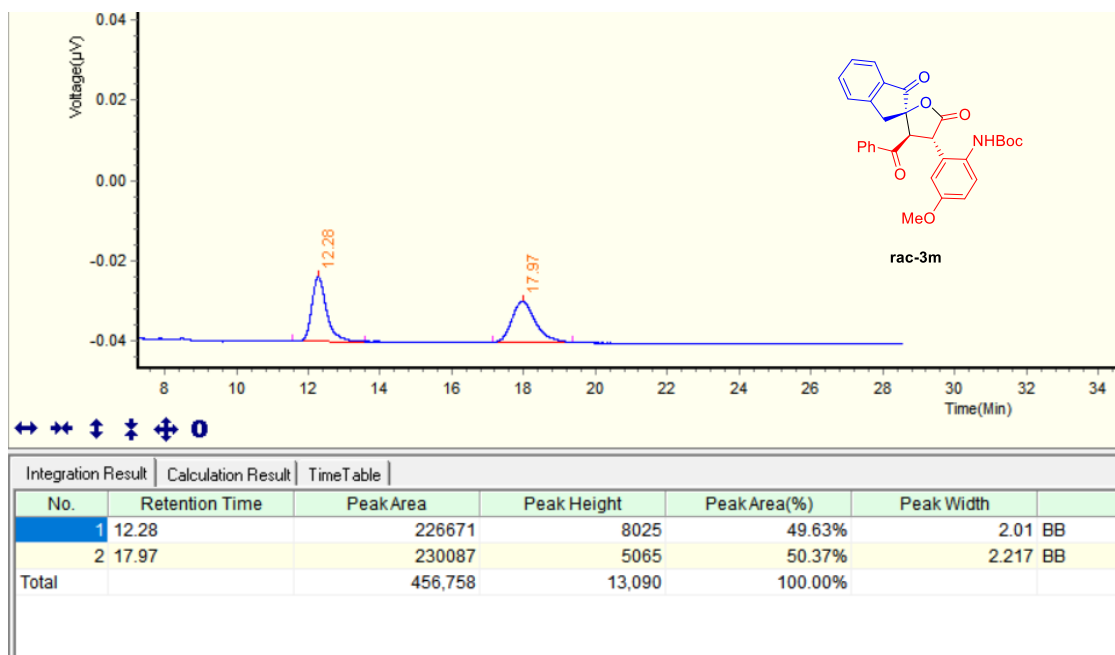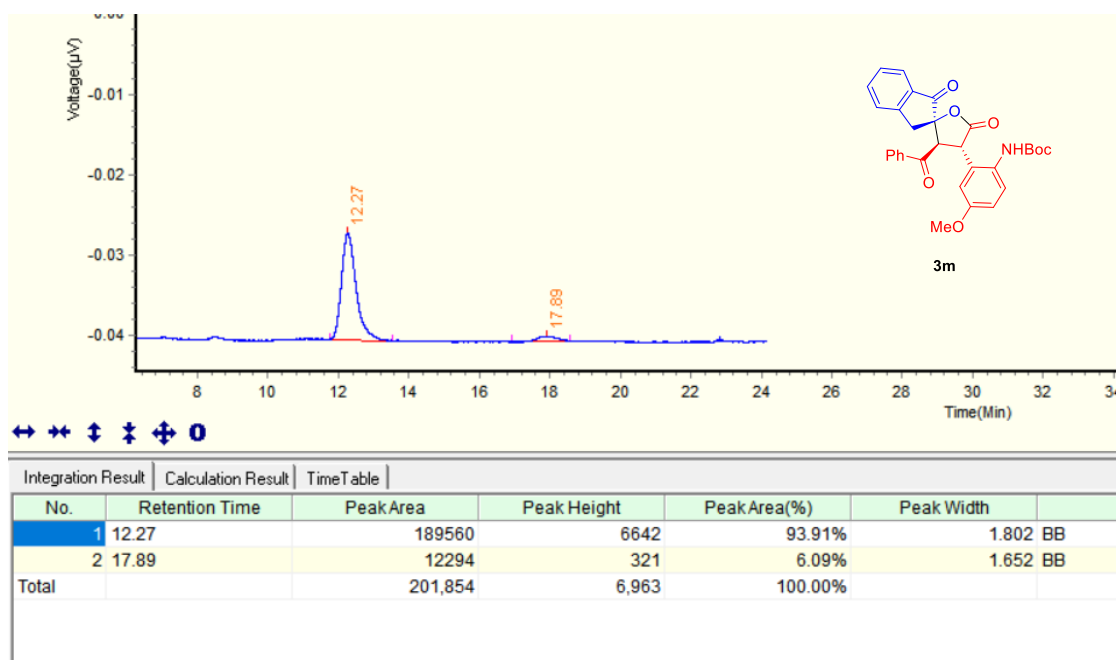

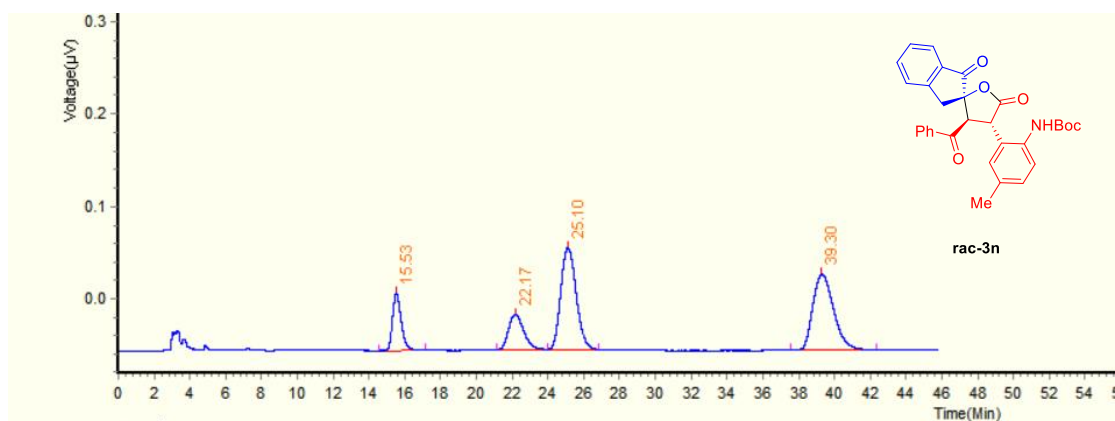

↔ \*\* ↑ ↓ + 0

| Integration Result |                | Calculation Result | TimeTable   |             |            |    |
|--------------------|----------------|--------------------|-------------|-------------|------------|----|
| No.                | Retention Time | PeakArea           | Peak Height | PeakArea(%) | Peak Width |    |
| 1                  | 15.53          | 1040376            | 30944       | 11.82%      | 2.609      | BB |
| 2                  | 22.17          | 1136507            | 19065       | 12.92%      | 2.781      | BV |
| 3                  | 25.10          | 3294864            | 54867       | 37.45%      | 2.864      | VB |
| 4                  | 39.30          | 3326796            | 41164       | 37.81%      | 4.793      | BB |
| Total              |                | 8,798,543          | 146,040     | 100.00%     |            |    |

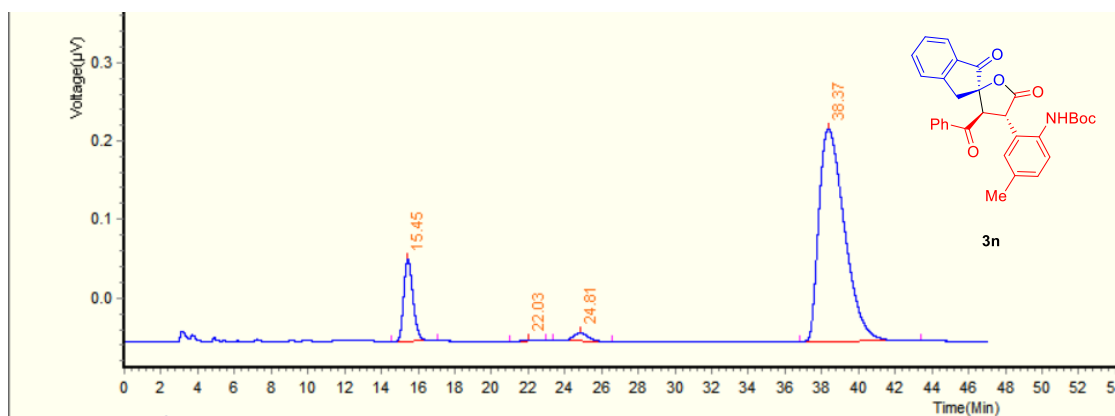

↔ \*\* ↑ ↓ + 0

| Integration Result |                | Calculation Result | TimeTable   |             |            |    |
|--------------------|----------------|--------------------|-------------|-------------|------------|----|
| No.                | Retention Time | PeakArea           | Peak Height | PeakArea(%) | Peak Width |    |
| 1                  | 15.45          | 1861274            | 52414       | 12.21%      | 2.487      | BB |
| 2                  | 22.03          | 16693              | 391         | 0.11%       | 1.999      | BB |
| 3                  | 24.81          | 298678             | 5081        | 1.96%       | 3.219      | BB |
| 4                  | 38.37          | 13070024           | 134671      | 85.72%      | 6.584      | BB |
| Total              |                | 15,246,669         | 192,557     | 100.00%     |            |    |

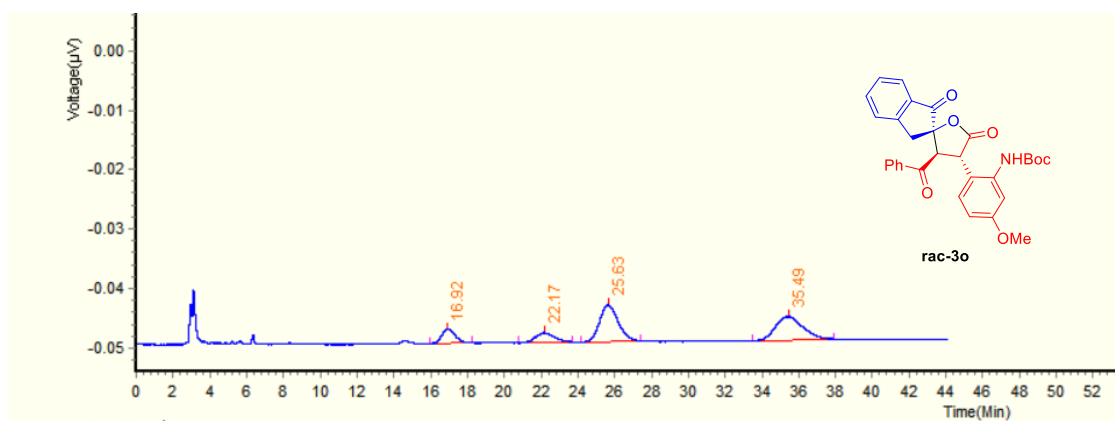

| Integration Result |                |           |             |              |            |    |
|--------------------|----------------|-----------|-------------|--------------|------------|----|
| Calculation Result |                | TimeTable |             |              |            |    |
| No.                | Retention Time | Peak Area | Peak Height | Peak Area(%) | Peak Width |    |
| 1                  | 16.92          | 60536     | 1224        | 11.22%       | 2.285      | BB |
| 2                  | 22.17          | 58132     | 827         | 10.78%       | 2.97       | BB |
| 3                  | 25.63          | 213424    | 3081        | 39.57%       | 3.291      | BB |
| 4                  | 35.49          | 207268    | 1988        | 38.43%       | 4.479      | BB |
| Total              |                | 539,360   | 7,120       | 100.00%      |            |    |

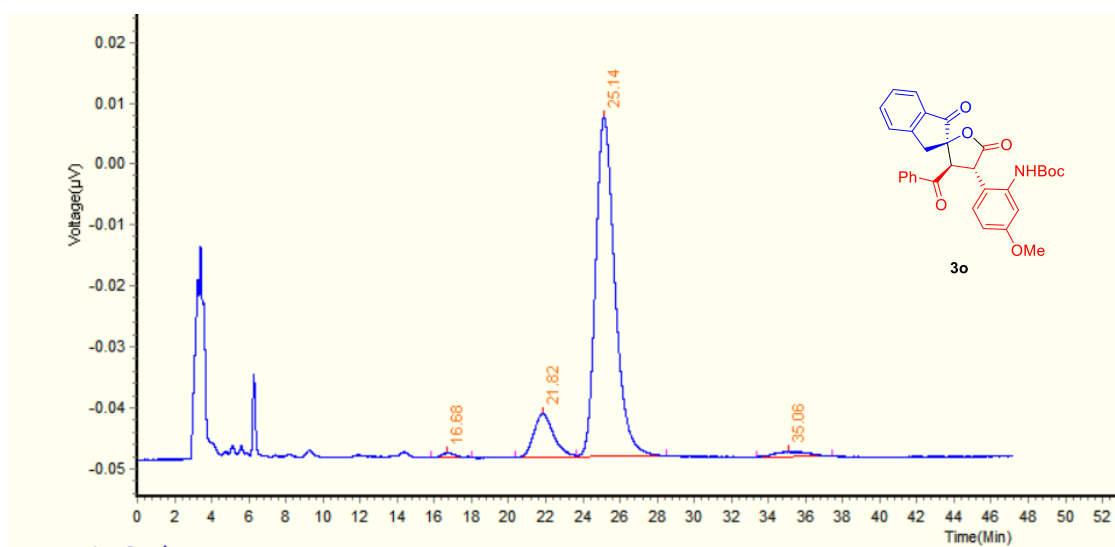

| Integration Result |                |           |             |              |            |    |
|--------------------|----------------|-----------|-------------|--------------|------------|----|
| Calculation Result |                | TimeTable |             |              |            |    |
| No.                | Retention Time | Peak Area | Peak Height | Peak Area(%) | Peak Width |    |
| 1                  | 16.68          | 15724     | 356         | 0.67%        | 2.201      | BB |
| 2                  | 21.82          | 264115    | 3557        | 11.29%       | 3.243      | BV |
| 3                  | 25.14          | 2010331   | 27912       | 85.94%       | 4.874      | VB |
| 4                  | 35.06          | 49035     | 386         | 2.10%        | 4.058      | BB |
| Total              |                | 2,339,205 | 32,211      | 100.00%      |            |    |

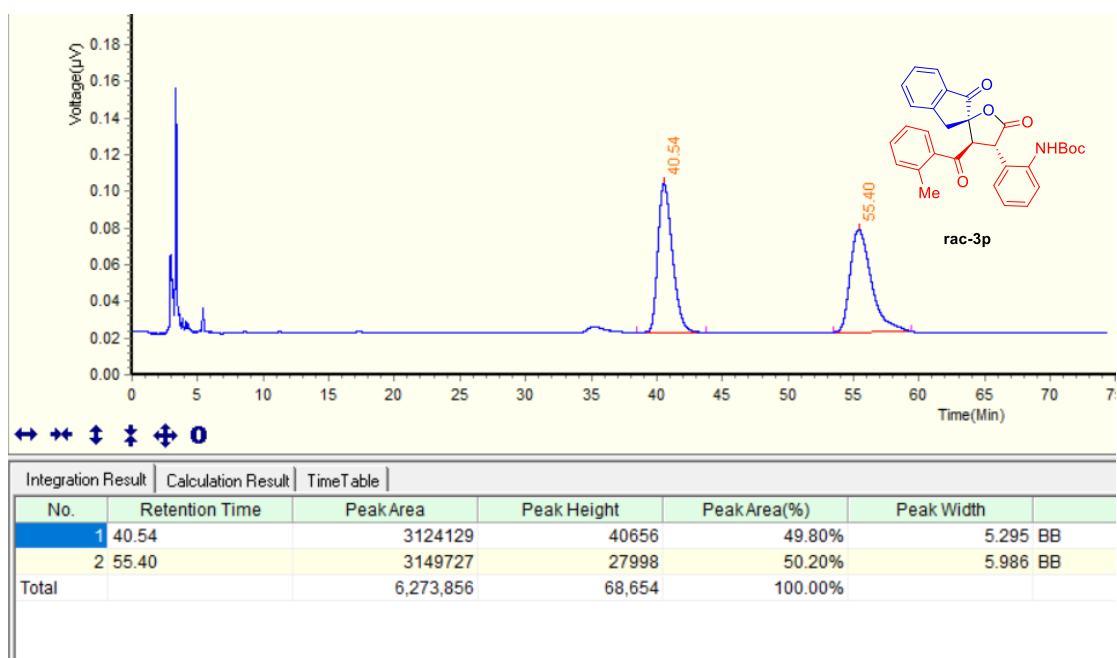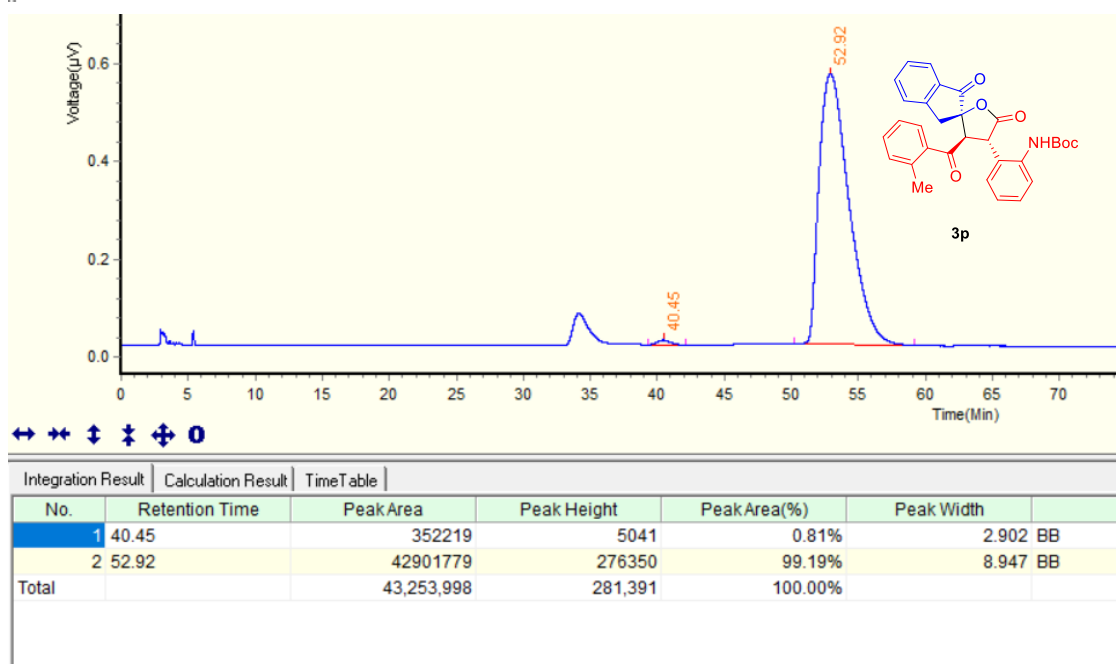

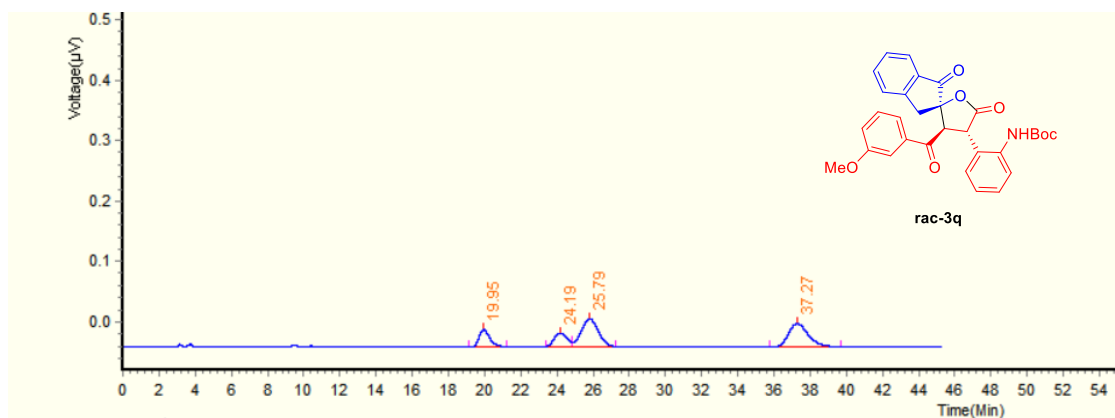

↔ \*\* ↑ ↓ 0

| Integration Result |                | Calculation Result | TimeTable   |             |            |    |
|--------------------|----------------|--------------------|-------------|-------------|------------|----|
| No.                | Retention Time | PeakArea           | Peak Height | PeakArea(%) | Peak Width |    |
| 1                  | 19.95          | 582550             | 14051       | 14.37%      | 2.139      | BB |
| 2                  | 24.19          | 537351             | 10996       | 13.26%      | 1.419      | BV |
| 3                  | 25.79          | 1479481            | 22934       | 36.51%      | 2.427      | VB |
| 4                  | 37.27          | 1453260            | 19069       | 35.86%      | 3.906      | BB |
| Total              |                | 4,052,642          | 67,050      | 100.00%     |            |    |

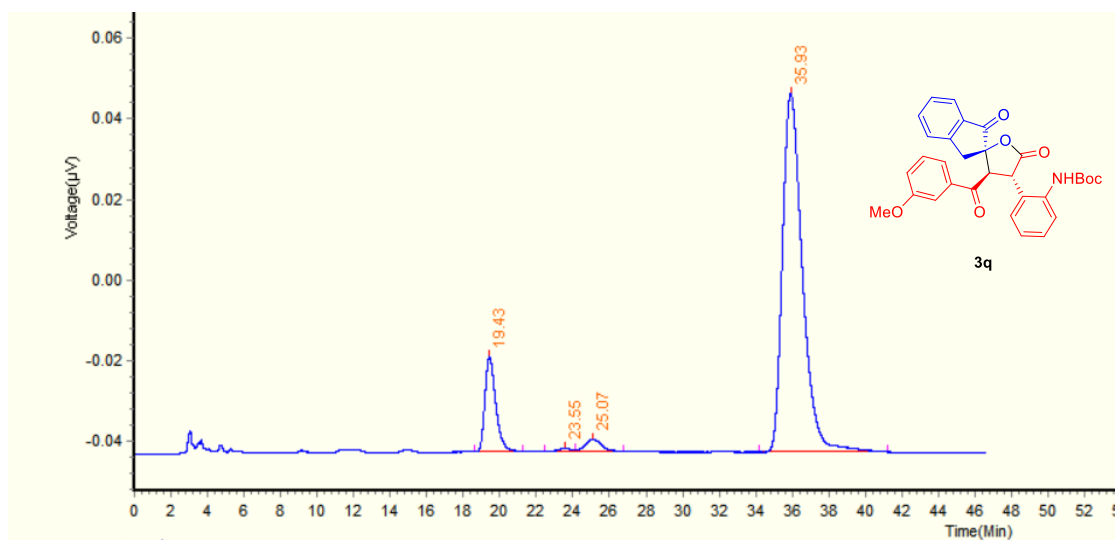

↔ \*\* ↑ ↓ 0

| Integration Result |                | Calculation Result | TimeTable   |             |            |    |
|--------------------|----------------|--------------------|-------------|-------------|------------|----|
| No.                | Retention Time | PeakArea           | Peak Height | PeakArea(%) | Peak Width |    |
| 1                  | 19.43          | 480477             | 11735       | 12.11%      | 2.703      | BB |
| 2                  | 23.55          | 17354              | 365         | 0.44%       | 1.688      | BV |
| 3                  | 25.07          | 89433              | 1470        | 2.25%       | 2.607      | VB |
| 4                  | 35.93          | 3380964            | 44525       | 85.20%      | 7.007      | BB |
| Total              |                | 3,968,228          | 58,095      | 100.00%     |            |    |

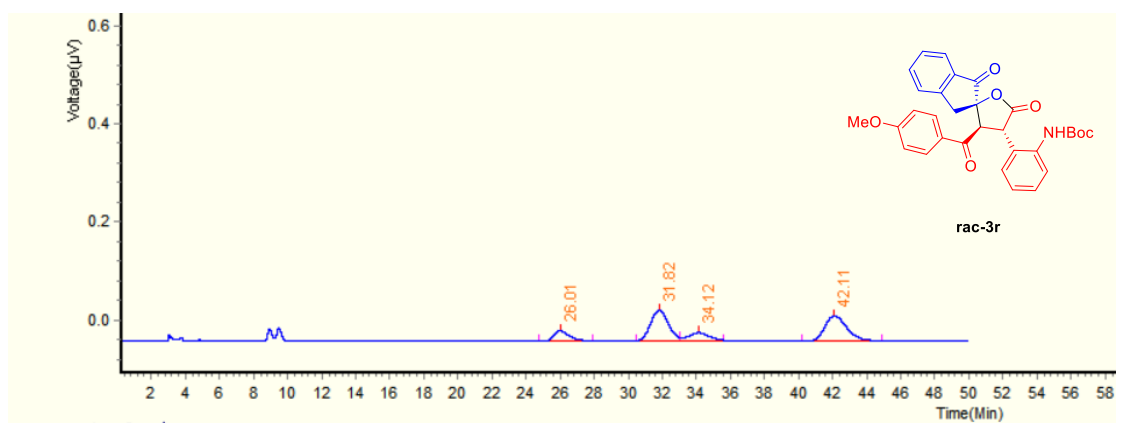

↔ \*\* ↑ ↓ 0

| Integration Result |                | Calculation Result | TimeTable   |             |            |    |
|--------------------|----------------|--------------------|-------------|-------------|------------|----|
| No.                | Retention Time | PeakArea           | Peak Height | PeakArea(%) | Peak Width |    |
| 1                  | 26.01          | 645970             | 10421       | 11.14%      | 3.157      | BB |
| 2                  | 31.82          | 2243085            | 30912       | 38.67%      | 2.612      | BV |
| 3                  | 34.12          | 645739             | 7832        | 11.13%      | 2.562      | VB |
| 4                  | 42.11          | 2265945            | 25469       | 39.06%      | 4.658      | BB |
| Total              |                | 5,800,739          | 74,634      | 100.00%     |            |    |

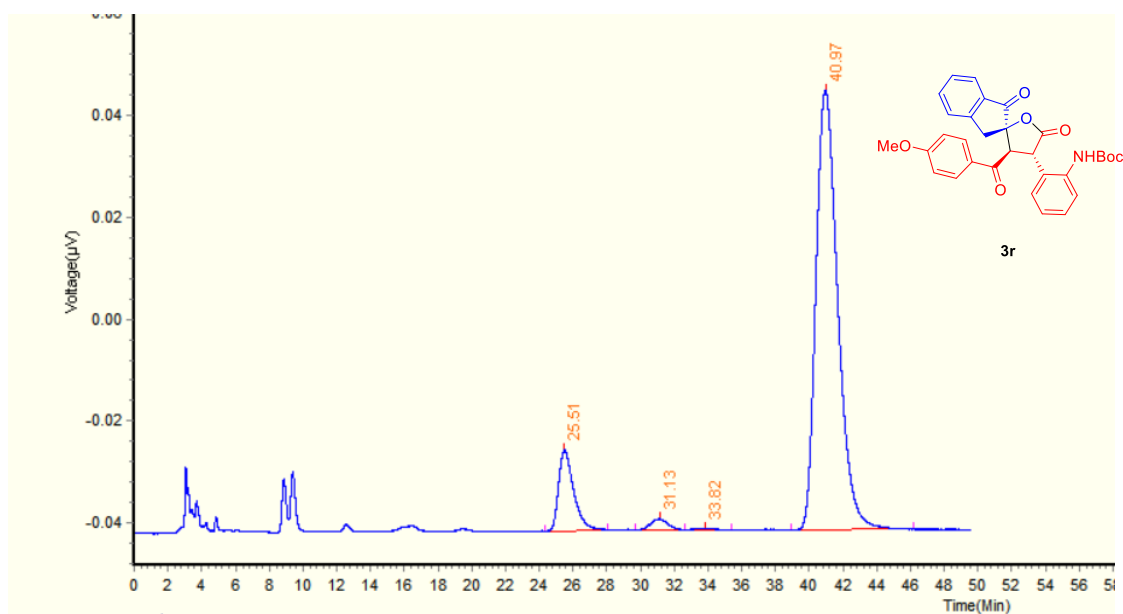

↔ \*\* ↑ ↓ 0

| Integration Result |                | Calculation Result | TimeTable   |             |            |    |
|--------------------|----------------|--------------------|-------------|-------------|------------|----|
| No.                | Retention Time | PeakArea           | Peak Height | PeakArea(%) | Peak Width |    |
| 1                  | 25.51          | 487420             | 7875        | 10.95%      | 3.754      | BB |
| 2                  | 31.13          | 73649              | 1077        | 1.65%       | 2.946      | BV |
| 3                  | 33.82          | 12025              | 174         | 0.27%       | 2.71       | VB |
| 4                  | 40.97          | 3877620            | 43182       | 87.12%      | 7.237      | BB |
| Total              |                | 4,450,714          | 52,308      | 100.00%     |            |    |

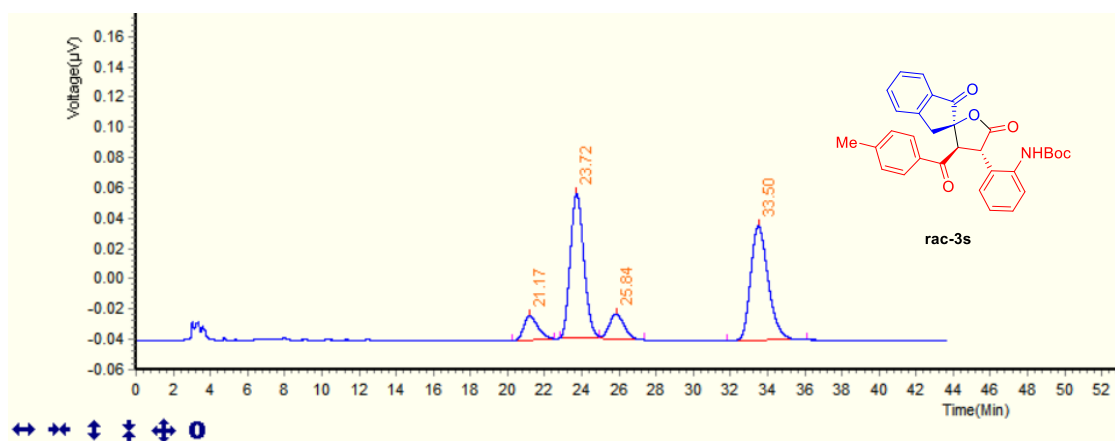

| Integration Result   Calculation Result   TimeTable |                |           |             |             |            |    |
|-----------------------------------------------------|----------------|-----------|-------------|-------------|------------|----|
| No.                                                 | Retention Time | PeakArea  | Peak Height | PeakArea(%) | Peak Width |    |
| 1                                                   | 21.17          | 418910    | 8064        | 7.19%       | 2.307      | BB |
| 2                                                   | 23.72          | 2458389   | 48002       | 42.19%      | 2.172      | BV |
| 3                                                   | 25.84          | 470947    | 8430        | 8.08%       | 2.351      | VB |
| 4                                                   | 33.50          | 2478666   | 37781       | 42.54%      | 4.297      | BB |
| Total                                               |                | 5,826,912 | 102,277     | 100.00%     |            |    |

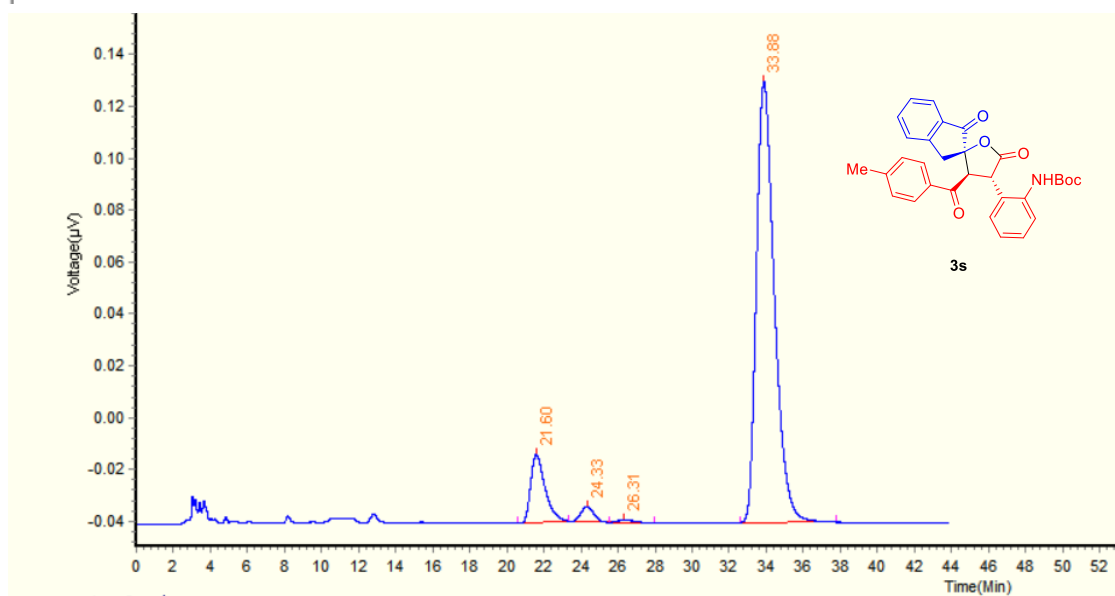

| Integration Result   Calculation Result   TimeTable |                |           |             |             |            |    |
|-----------------------------------------------------|----------------|-----------|-------------|-------------|------------|----|
| No.                                                 | Retention Time | PeakArea  | Peak Height | PeakArea(%) | Peak Width |    |
| 1                                                   | 24.33          | 133012    | 2850        | 2.02%       | 2.227      | BV |
| 2                                                   | 26.31          | 22850     | 498         | 0.35%       | 2.408      | VB |
| 3                                                   | 21.60          | 703654    | 13047       | 10.71%      | 2.728      | BB |
| 4                                                   | 33.88          | 5710590   | 84980       | 86.92%      | 5.182      | BB |
| Total                                               |                | 6,570,106 | 101,375     | 100.00%     |            |    |

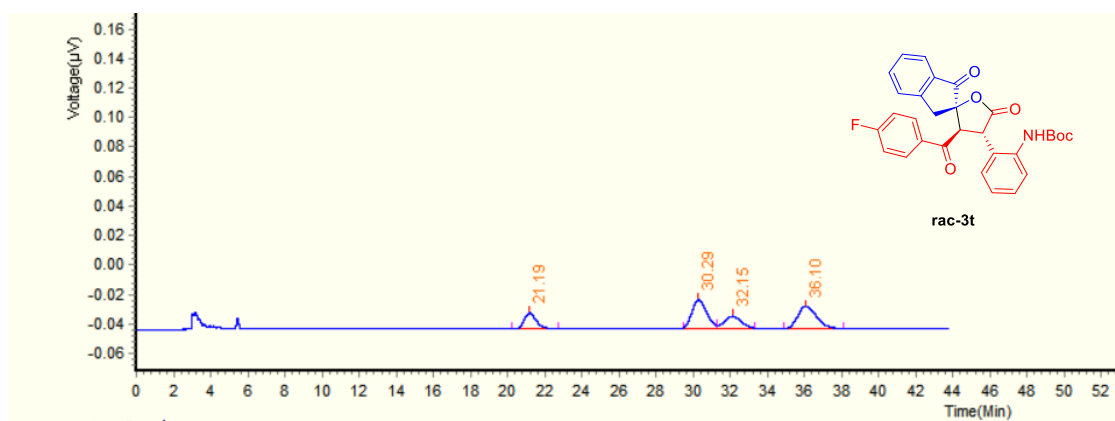

↔ \* ↑ ↓ ⊕ 0

| Integration Result |                | Calculation Result | TimeTable   |             |            |    |
|--------------------|----------------|--------------------|-------------|-------------|------------|----|
| No.                | Retention Time | PeakArea           | Peak Height | PeakArea(%) | Peak Width |    |
| 1                  | 21.19          | 245623             | 5409        | 15.84%      | 2.542      | BB |
| 2                  | 30.29          | 523410             | 9612        | 33.75%      | 1.861      | BV |
| 3                  | 32.15          | 248239             | 4066        | 16.01%      | 2.042      | VB |
| 4                  | 36.10          | 533602             | 7649        | 34.41%      | 3.177      | BB |
| Total              |                | 1,550,874          | 26,736      | 100.00%     |            |    |

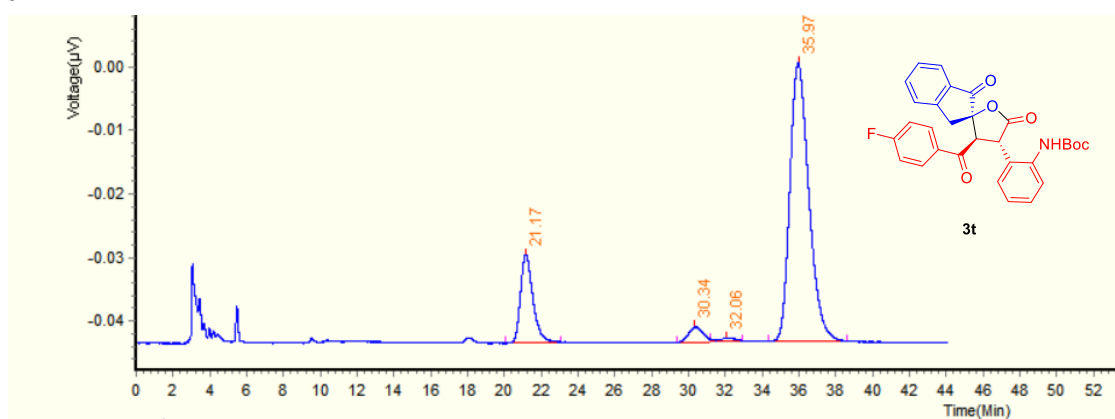

↔ \* ↑ ↓ ⊕ 0

| Integration Result |                | Calculation Result | TimeTable   |             |            |    |
|--------------------|----------------|--------------------|-------------|-------------|------------|----|
| No.                | Retention Time | PeakArea           | Peak Height | PeakArea(%) | Peak Width |    |
| 1                  | 21.17          | 321809             | 6896        | 16.36%      | 3.015      | BB |
| 2                  | 30.34          | 64131              | 1188        | 3.26%       | 1.885      | BV |
| 3                  | 32.06          | 15850              | 280         | 0.81%       | 1.723      | VB |
| 4                  | 35.97          | 1564979            | 21874       | 79.57%      | 4.249      | BB |
| Total              |                | 1,966,769          | 30,238      | 100.00%     |            |    |

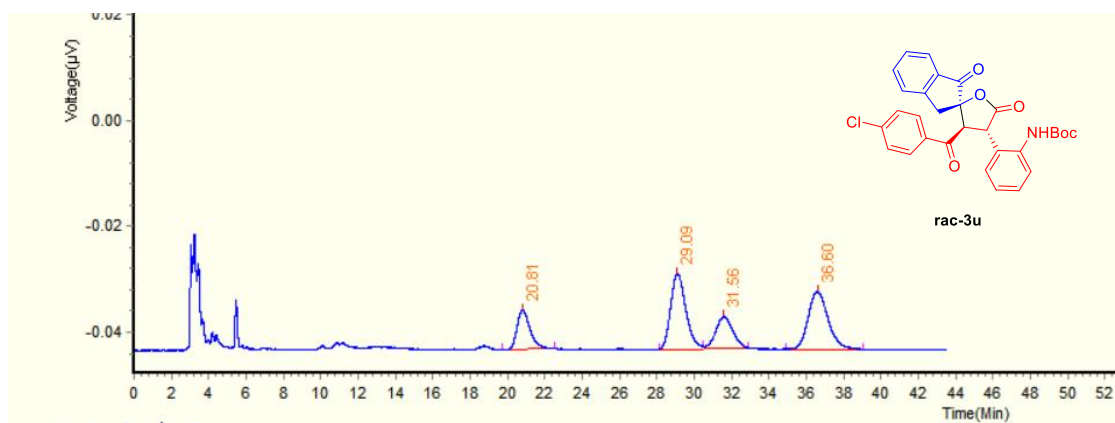

↔ \*\* ↑ ↓ + 0

| Integration Result |                | Calculation Result | TimeTable   |             |            |    |
|--------------------|----------------|--------------------|-------------|-------------|------------|----|
| No.                | Retention Time | PeakArea           | Peak Height | PeakArea(%) | Peak Width |    |
| 1                  | 20.81          | 178370             | 3716        | 15.27%      | 2.796      | BB |
| 2                  | 29.09          | 398490             | 7065        | 34.12%      | 2.39       | BV |
| 3                  | 31.56          | 188887             | 2982        | 16.18%      | 2.434      | VB |
| 4                  | 36.60          | 402001             | 5467        | 34.43%      | 4.149      | BB |
| Total              |                | 1,167,748          | 19,230      | 100.00%     |            |    |

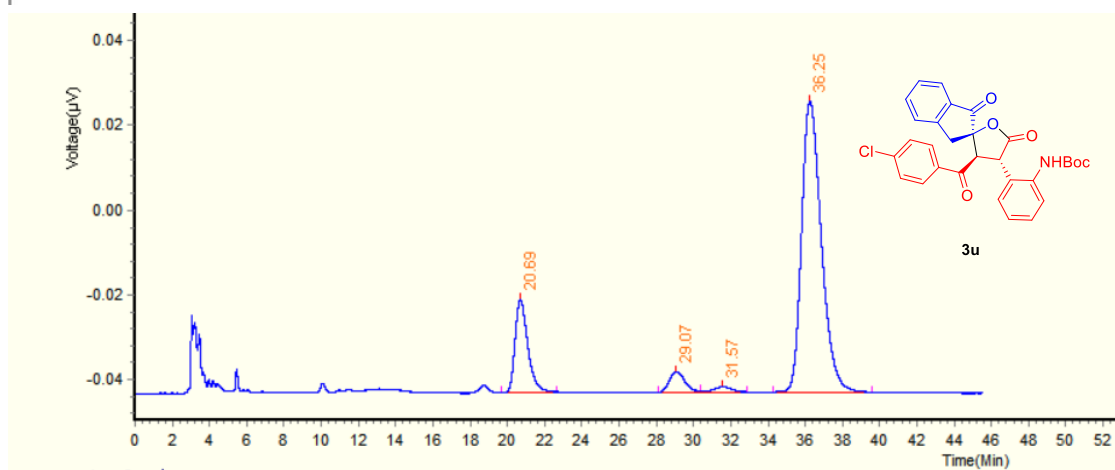

↔ \*\* ↑ ↓ + 0

| Integration Result |                | Calculation Result | TimeTable   |             |            |    |
|--------------------|----------------|--------------------|-------------|-------------|------------|----|
| No.                | Retention Time | PeakArea           | Peak Height | PeakArea(%) | Peak Width |    |
| 1                  | 20.69          | 521943             | 10986       | 16.17%      | 2.972      | BB |
| 2                  | 29.07          | 139588             | 2457        | 4.33%       | 2.264      | BV |
| 3                  | 31.57          | 41391              | 653         | 1.28%       | 2.499      | VB |
| 4                  | 36.25          | 2524127            | 34294       | 78.22%      | 5.331      | BB |
| Total              |                | 3,227,049          | 48,390      | 100.00%     |            |    |

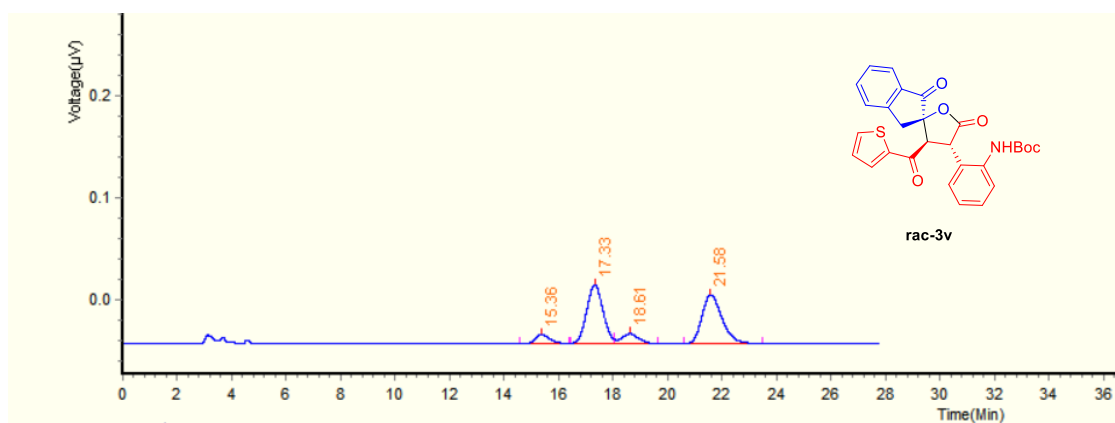

↔ \* ↑ ↓ ⊕ 0

| Integration Result |                | Calculation Result |             | TimeTable   |            |    |
|--------------------|----------------|--------------------|-------------|-------------|------------|----|
| No.                | Retention Time | PeakArea           | Peak Height | PeakArea(%) | Peak Width |    |
| 1                  | 15.36          | 159594             | 4286        | 5.76%       | 1.843      | BB |
| 2                  | 17.33          | 1192607            | 28664       | 43.02%      | 1.635      | BV |
| 3                  | 18.61          | 205375             | 4725        | 7.41%       | 1.59       | VB |
| 4                  | 21.58          | 1214873            | 23750       | 43.82%      | 2.908      | BB |
| Total              |                | 2,772,449          | 61,425      | 100.00%     |            |    |

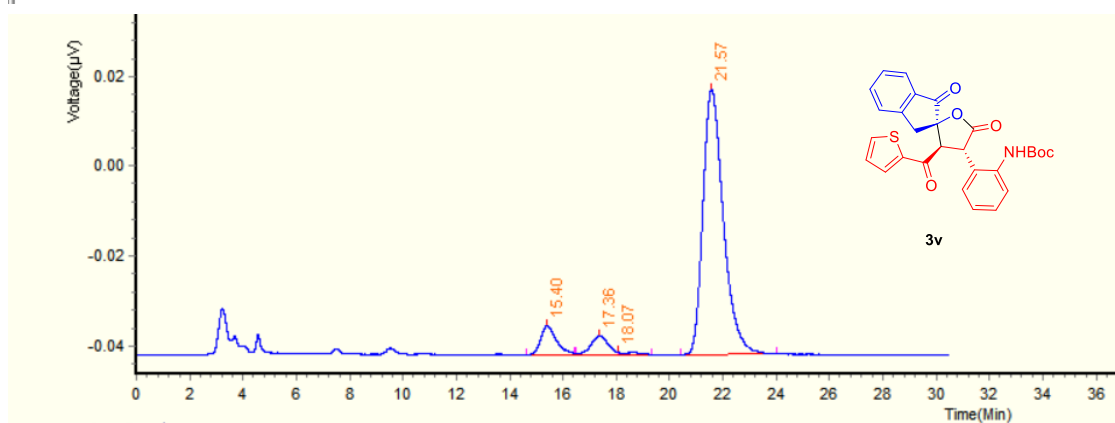

↔ \* ↑ ↓ ⊕ 0

| Integration Result |                | Calculation Result |             | TimeTable   |            |    |
|--------------------|----------------|--------------------|-------------|-------------|------------|----|
| No.                | Retention Time | PeakArea           | Peak Height | PeakArea(%) | Peak Width |    |
| 1                  | 15.40          | 131961             | 3187        | 7.31%       | 1.832      | BV |
| 2                  | 17.36          | 93024              | 2119        | 5.15%       | 1.61       | WV |
| 3                  | 18.07          | 10738              | 249         | 0.59%       | 1.231      | VB |
| 4                  | 21.57          | 1570018            | 29537       | 86.95%      | 3.632      | BB |
| Total              |                | 1,805,741          | 35,092      | 100.00%     |            |    |

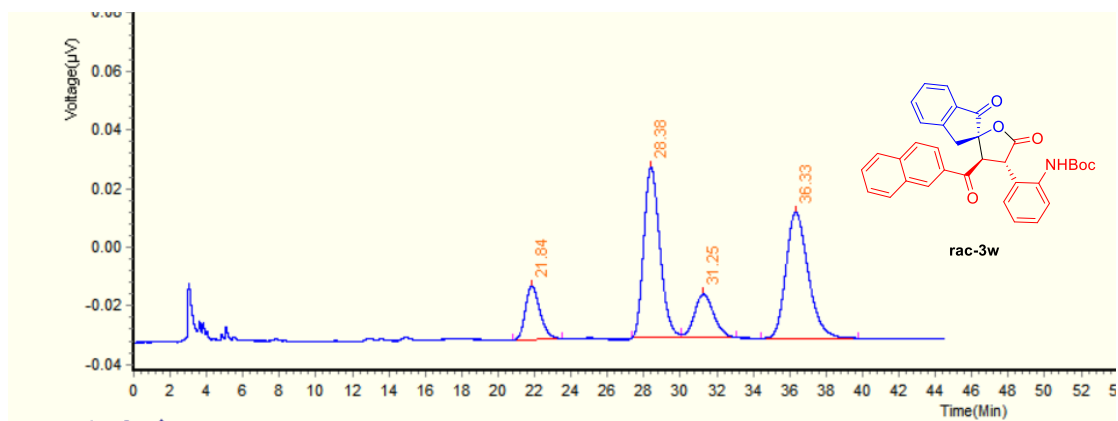

↔ \*\* ↑ ↓ + 0

| Integration Result |                | Calculation Result | TimeTable   |             |            |    |
|--------------------|----------------|--------------------|-------------|-------------|------------|----|
| No.                | Retention Time | PeakArea           | Peak Height | PeakArea(%) | Peak Width |    |
| 1                  | 21.84          | 504067             | 9147        | 10.81%      | 2.674      | BB |
| 2                  | 28.38          | 1790573            | 29089       | 38.41%      | 2.721      | BV |
| 3                  | 31.25          | 541589             | 7420        | 11.62%      | 2.996      | VB |
| 4                  | 36.33          | 1825346            | 21519       | 39.16%      | 5.396      | BB |
| Total              |                | 4,661,575          | 67,175      | 100.00%     |            |    |

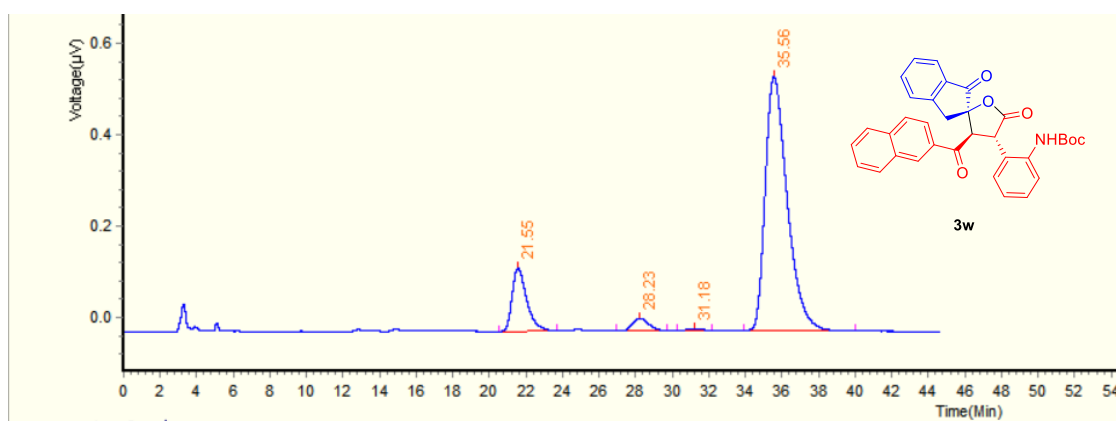

↔ \*\* ↑ ↓ + 0

| Integration Result |                | Calculation Result | TimeTable   |             |            |    |
|--------------------|----------------|--------------------|-------------|-------------|------------|----|
| No.                | Retention Time | PeakArea           | Peak Height | PeakArea(%) | Peak Width |    |
| 1                  | 21.55          | 3808388            | 68699       | 13.60%      | 3.208      | BB |
| 2                  | 28.23          | 848654             | 13672       | 3.03%       | 2.751      | BB |
| 3                  | 31.18          | 126477             | 2099        | 0.45%       | 1.925      | BB |
| 4                  | 35.56          | 23219116           | 277784      | 82.92%      | 6.098      | BB |
| Total              |                | 28,002,635         | 362,254     | 100.00%     |            |    |

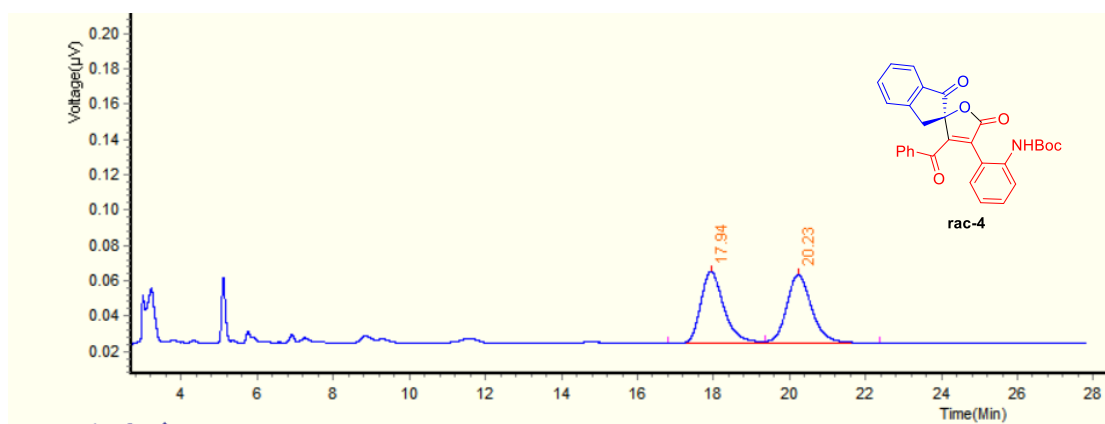

↔ \*\* ↑ ↓ ⊕ 0

| Integration Result |                | Calculation Result | TimeTable   |             |            |    |
|--------------------|----------------|--------------------|-------------|-------------|------------|----|
| No.                | Retention Time | PeakArea           | Peak Height | PeakArea(%) | Peak Width |    |
| 1                  | 17.94          | 879243             | 20446       | 49.41%      | 2.53       | BV |
| 2                  | 20.23          | 900149             | 19438       | 50.59%      | 3.026      | VB |
| Total              |                | 1,779,392          | 39,884      | 100.00%     |            |    |

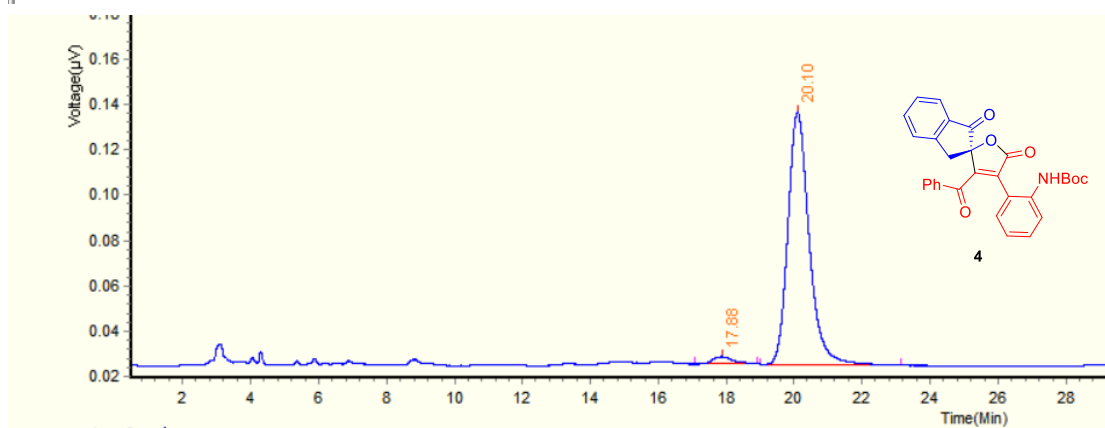

↔ \*\* ↑ ↓ ⊕ 0

| Integration Result |                | Calculation Result | TimeTable   |             |            |    |
|--------------------|----------------|--------------------|-------------|-------------|------------|----|
| No.                | Retention Time | PeakArea           | Peak Height | PeakArea(%) | Peak Width |    |
| 1                  | 17.88          | 66038              | 1616        | 2.67%       | 1.838      | BB |
| 2                  | 20.10          | 2409260            | 55636       | 97.33%      | 4.113      | BB |
| Total              |                | 2,475,298          | 57,252      | 100.00%     |            |    |

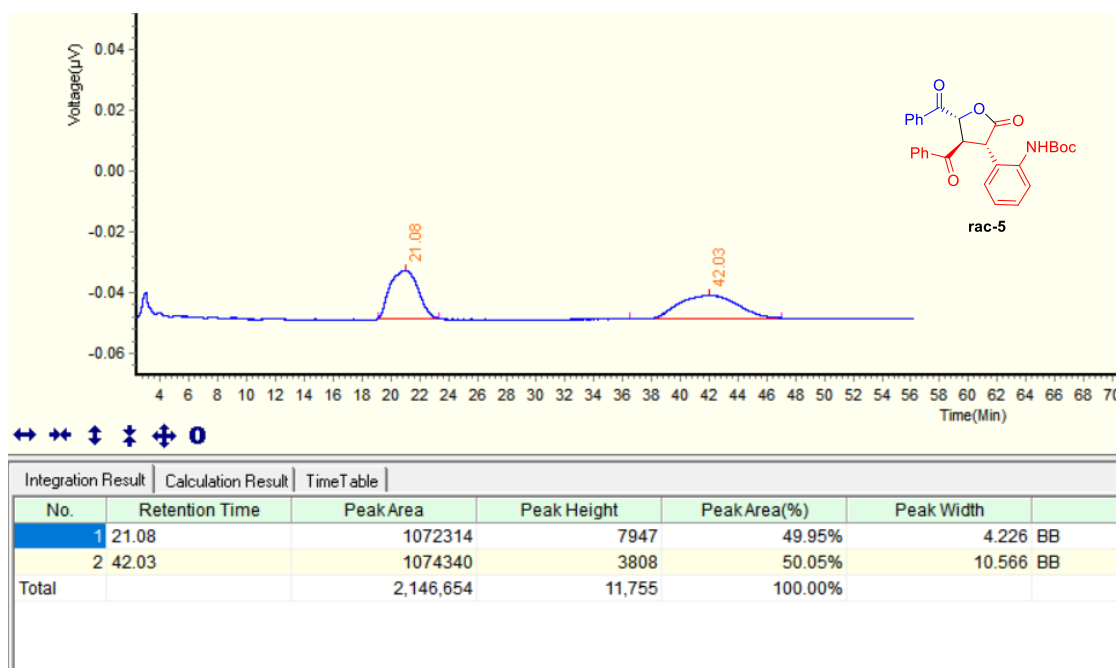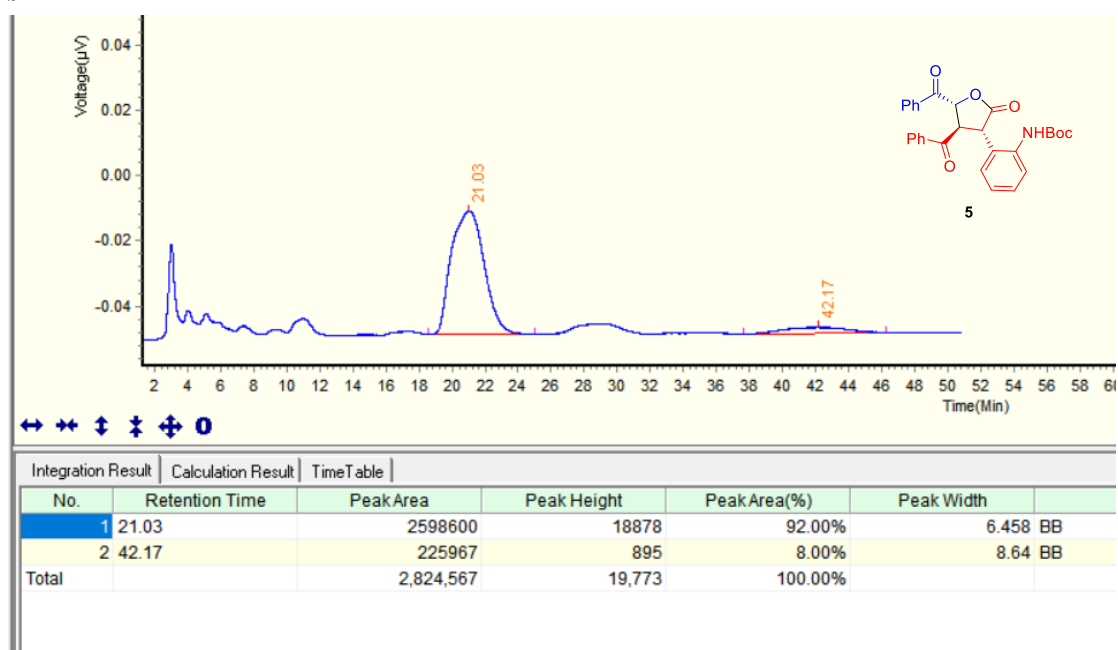

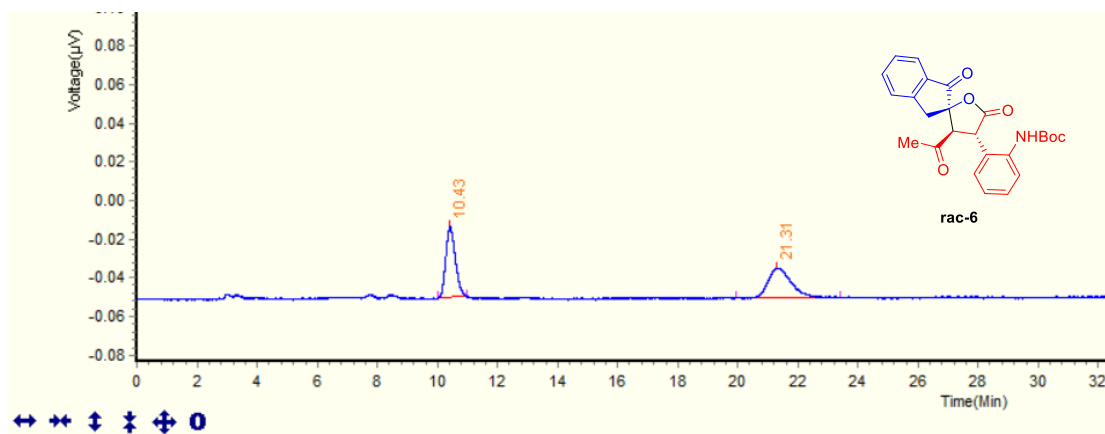

| Integration Result |                |           |             |             |            |    |
|--------------------|----------------|-----------|-------------|-------------|------------|----|
| Calculation Result |                | TimeTable |             |             |            |    |
| No.                | Retention Time | Peak Area | Peak Height | PeakArea(%) | Peak Width |    |
| 1                  | 10.43          | 399168    | 18272       | 50.05%      | 0.924      | BB |
| 2                  | 21.31          | 398301    | 7577        | 49.95%      | 3.453      | BB |
| Total              |                | 797,469   | 25,849      | 100.00%     |            |    |

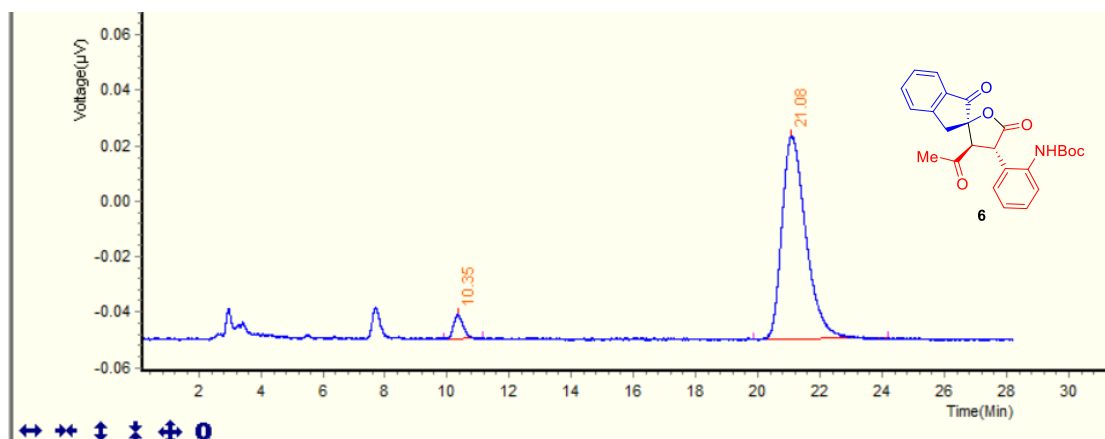

| Integration Result |                |           |             |             |            |    |
|--------------------|----------------|-----------|-------------|-------------|------------|----|
| Calculation Result |                | TimeTable |             |             |            |    |
| No.                | Retention Time | Peak Area | Peak Height | PeakArea(%) | Peak Width |    |
| 1                  | 10.35          | 90714     | 4242        | 4.42%       | 1.257      | BB |
| 2                  | 21.08          | 1961083   | 36535       | 95.58%      | 4.353      | BB |
| Total              |                | 2,051,797 | 40,777      | 100.00%     |            |    |

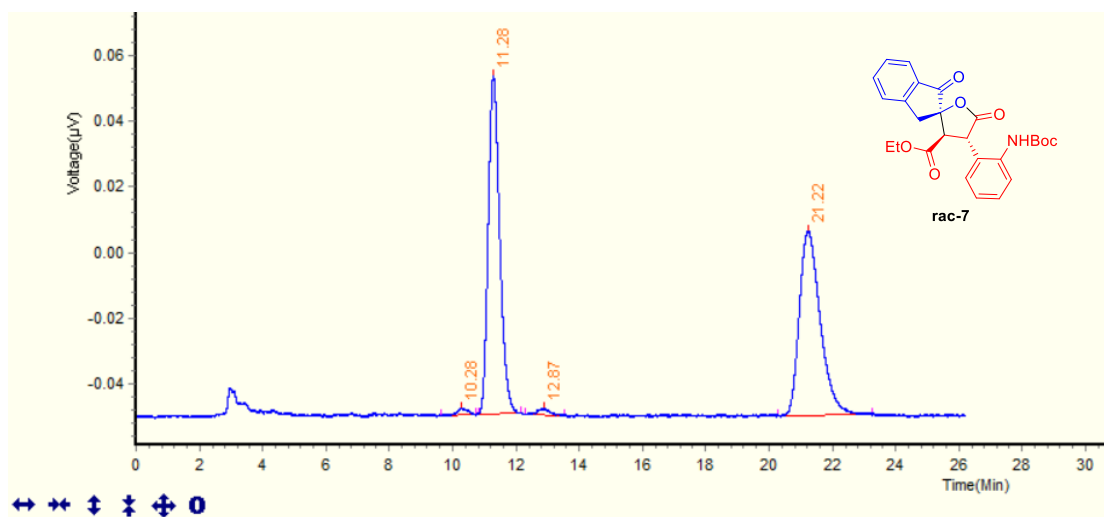

| Integration Result |                | Calculation Result | TimeTable   |              |            |    |
|--------------------|----------------|--------------------|-------------|--------------|------------|----|
| No.                | Retention Time | Peak Area          | Peak Height | Peak Area(%) | Peak Width |    |
| 1                  | 10.28          | 18226              | 955         | 0.70%        | 1.086      | BB |
| 2                  | 11.28          | 1293800            | 51500       | 49.37%       | 1.331      | BB |
| 3                  | 12.87          | 23245              | 955         | 0.89%        | 1.277      | BB |
| 4                  | 21.22          | 1285550            | 27940       | 49.05%       | 2.987      | BB |
| Total              |                | 2,620,821          | 81,350      | 100.00%      |            |    |

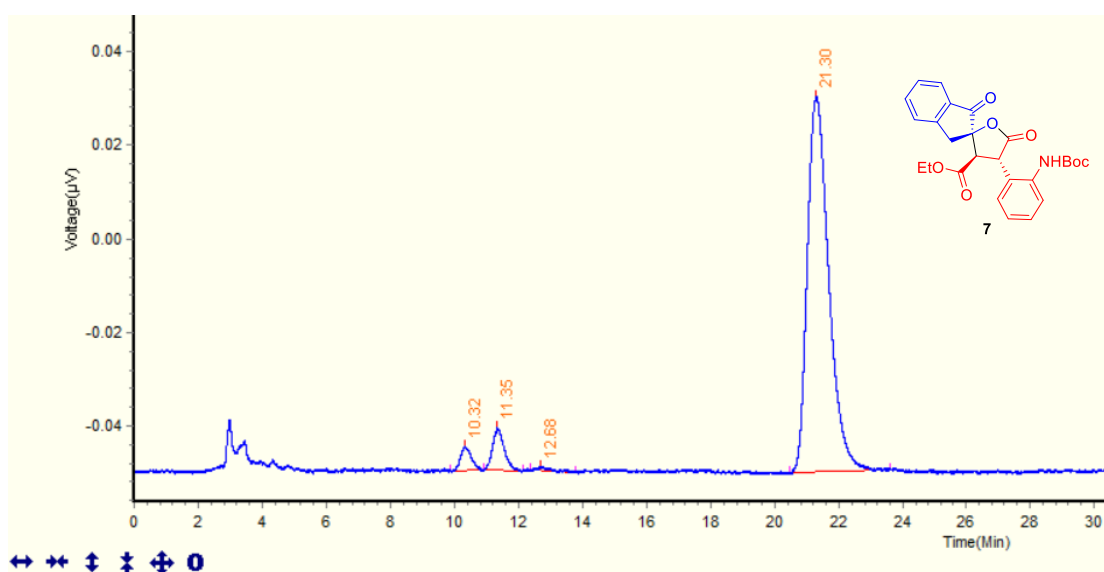

| Integration Result |                | Calculation Result | TimeTable   |              |            |    |
|--------------------|----------------|--------------------|-------------|--------------|------------|----|
| No.                | Retention Time | Peak Area          | Peak Height | Peak Area(%) | Peak Width |    |
| 1                  | 10.32          | 60230              | 2598        | 2.94%        | 1.005      | BB |
| 2                  | 11.35          | 110178             | 4485        | 5.39%        | 1.2        | BB |
| 3                  | 12.68          | 11636              | 455         | 0.57%        | 1.428      | BB |
| 4                  | 21.30          | 1863354            | 40266       | 91.10%       | 3.147      | BB |
| Total              |                | 2,045,398          | 47,804      | 100.00%      |            |    |

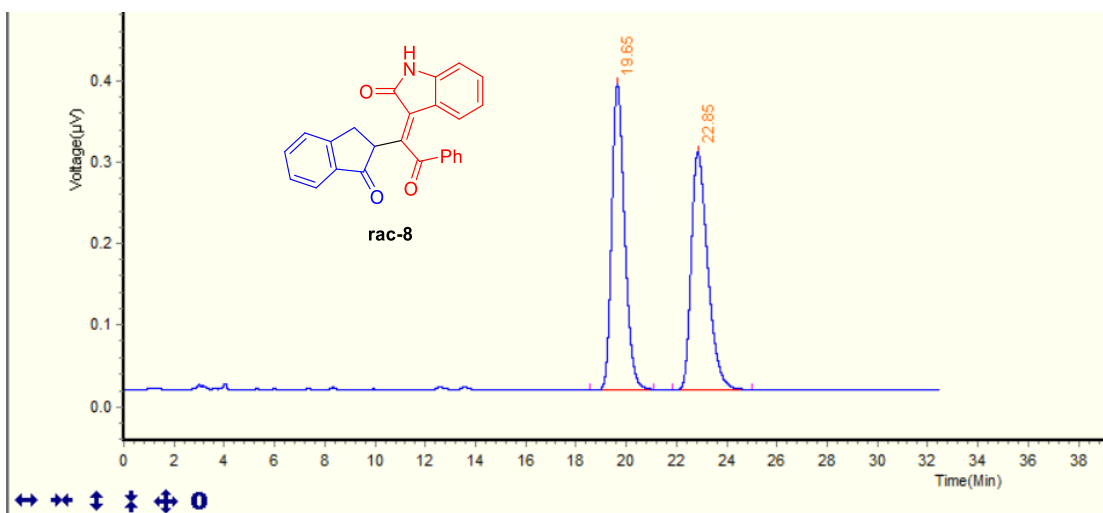

↔ \*\* ↑ ↓ ⊕ ⊖

| Integration Result |                | Calculation Result | TimeTable   |             |            |
|--------------------|----------------|--------------------|-------------|-------------|------------|
| No.                | Retention Time | PeakArea           | Peak Height | PeakArea(%) | Peak Width |
| 1                  | 19.65          | 6667527            | 187146      | 50.06%      | 2.535 BB   |
| 2                  | 22.85          | 6651082            | 145560      | 49.94%      | 3.168 BB   |
| Total              |                | 13,318,609         | 332,706     | 100.00%     |            |

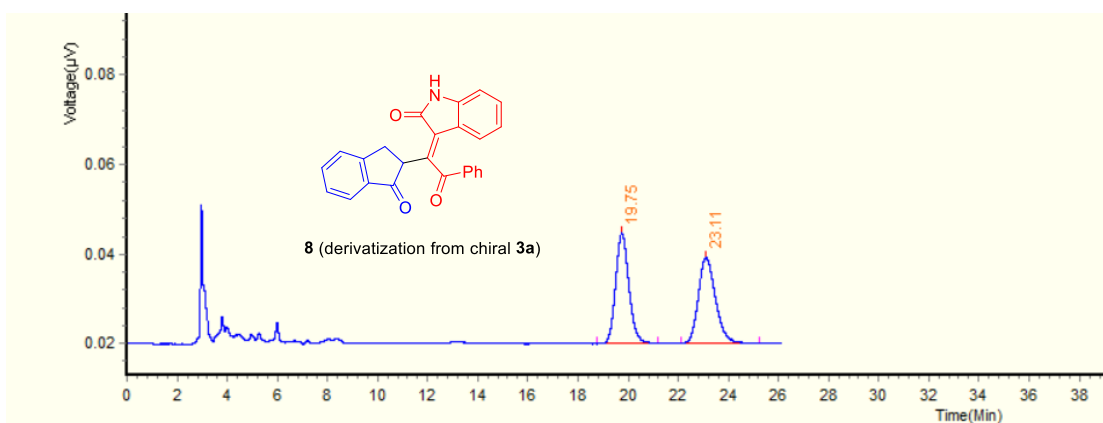

↔ \*\* ↑ ↓ ⊕ ⊖

| Integration Result |                | Calculation Result | TimeTable   |             |            |
|--------------------|----------------|--------------------|-------------|-------------|------------|
| No.                | Retention Time | PeakArea           | Peak Height | PeakArea(%) | Peak Width |
| 1                  | 19.75          | 451674             | 12291       | 49.70%      | 2.43 BB    |
| 2                  | 23.11          | 457178             | 9609        | 50.30%      | 3.125 BB   |
| Total              |                | 908,852            | 21,900      | 100.00%     |            |

## Single-crystal X-ray diffraction of 3p (CCDC 2167416)

X-ray analysis was carried out using the single crystal which was grown in Hexane/CHCl<sub>3</sub>.

The instrumentation used for the crystal measurement is Oxford Gemini E X-ray single-crystal diffractometer (ellipsoid contour at 30% probability level).

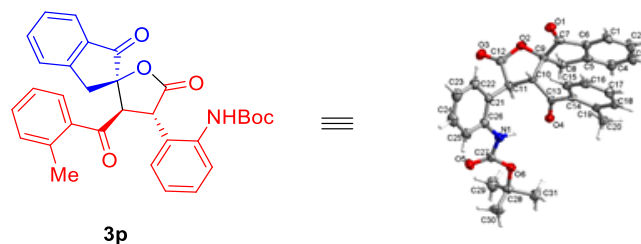

## checkCIF/PLATON report

Structure factors have been supplied for datablock(s) 20220464\_sq

THIS REPORT IS FOR GUIDANCE ONLY. IF USED AS PART OF A REVIEW PROCEDURE FOR PUBLICATION, IT SHOULD NOT REPLACE THE EXPERTISE OF AN EXPERIENCED CRYSTALLOGRAPHIC REFEREE.

No syntax errors found.      CIF dictionary      Interpreting this report

## Datablock: 20220464\_sq

|                        |                                         |                           |
|------------------------|-----------------------------------------|---------------------------|
| Bond precision:        | C-C = 0.0073 Å                          | Wavelength=1.54184        |
| Cell:                  | a=15.8569 (2)<br>alpha=90               | b=17.1648 (2)<br>beta=90  |
| Temperature:           | 293 K                                   | c=35.0258 (4)<br>gamma=90 |
| Volume                 | Calculated<br>9533.3 (2)                | Reported<br>9533.3 (2)    |
| Space group            | P 21 21 21                              | P 21 21 21                |
| Hall group             | P 2ac 2ab                               | P 2ac 2ab                 |
| Moiety formula         | 3(C31 H29 N O6), C H Cl3 [+<br>solvent] | 3(C31 H29 N O6), C H Cl3  |
| Sum formula            | C94 H88 Cl3 N3 O18 [+<br>solvent]       | C94 H88 Cl3 N3 O18        |
| Mr                     | 1654.02                                 | 1654.02                   |
| Dx, g cm <sup>-3</sup> | 1.152                                   | 1.152                     |
| Z                      | 4                                       | 4                         |
| Mu (mm <sup>-1</sup> ) | 1.394                                   | 1.394                     |
| F000                   | 3472.0                                  | 3472.0                    |
| F000'                  | 3486.70                                 |                           |
| h, k, lmax             | 19, 21, 42                              | 19, 20, 42                |
| Nref                   | 18387 [ 10016]                          | 17862                     |
| Tmin, Tmax             | 0.818, 0.946                            | 0.745, 1.000              |
| Tmin'                  | 0.736                                   |                           |

Correction method= # Reported T Limits: Tmin=0.745 Tmax=1.000  
AbsCorr = MULTI-SCAN

Data completeness= 1.78/0.97      Theta(max)= 70.884

R(reflections)= 0.0537( 12582)

wR2(reflections)=  
0.1577( 17862)

S = 1.016

Npar= 1064

The following ALERTS were generated. Each ALERT has the format

**test-name\_ALERT\_alert-type\_alert-level.**

Click on the hyperlinks for more details of the test.

#### ● Alert level C

|                   |                                                 |       |       |         |              |
|-------------------|-------------------------------------------------|-------|-------|---------|--------------|
| PLAT234_ALERT_4_C | Large Hirshfeld Difference C4'                  | --C5' | .     | 0.17    | Ang.         |
| PLAT241_ALERT_2_C | High 'MainMol' Ueq as Compared to Neighbors of  |       | C1'   | Check   |              |
| PLAT241_ALERT_2_C | High 'MainMol' Ueq as Compared to Neighbors of  |       | C2'   | Check   |              |
| PLAT241_ALERT_2_C | High 'MainMol' Ueq as Compared to Neighbors of  |       | C17'  | Check   |              |
| PLAT241_ALERT_2_C | High 'MainMol' Ueq as Compared to Neighbors of  |       | C2''  | Check   |              |
| PLAT241_ALERT_2_C | High 'MainMol' Ueq as Compared to Neighbors of  |       | C17'' | Check   |              |
| PLAT242_ALERT_2_C | Low 'MainMol' Ueq as Compared to Neighbors of   |       | C28   | Check   |              |
| PLAT242_ALERT_2_C | Low 'MainMol' Ueq as Compared to Neighbors of   |       | C28'' | Check   |              |
| PLAT260_ALERT_2_C | Large Average Ueq of Residue Including          | O1'   |       | 0.109   | Check        |
| PLAT260_ALERT_2_C | Large Average Ueq of Residue Including          | Cl1   |       | 0.201   | Check        |
| PLAT260_ALERT_2_C | Large Average Ueq of Residue Including          | Cl1A  |       | 0.201   | Check        |
| PLAT334_ALERT_2_C | Small Aver. Benzene C-C Dist C1"                | -C6"  |       | 1.37    | Ang.         |
| PLAT340_ALERT_3_C | Low Bond Precision on C-C Bonds .....           |       |       | 0.00733 | Ang.         |
| PLAT911_ALERT_3_C | Missing FCF Refl Between Thmin & STh/L-         |       | 0.600 | 4       | Report       |
| PLAT918_ALERT_3_C | Reflection(s) with I(obs) much Smaller I(calc)  |       |       | 1       | Check        |
| PLAT987_ALERT_1_C | The Flack x is >> 0 - Do a BASF/TWIN Refinement |       |       |         | Please Check |

#### ● Alert level G

|                   |                                                  |                    |   |       |        |
|-------------------|--------------------------------------------------|--------------------|---|-------|--------|
| PLAT002_ALERT_2_G | Number of Distance or Angle Restraints on AtSite |                    |   | 6     | Note   |
| PLAT007_ALERT_5_G | Number of Unrefined Donor-H Atoms .....          |                    |   | 3     | Report |
| PLAT033_ALERT_4_G | Flack x Value Deviates > 3.0 * sigma from Zero . |                    |   | 0.037 | Note   |
| PLAT171_ALERT_4_G | The CIF-Embedded .res File Contains EADP Records |                    |   | 4     | Report |
| PLAT172_ALERT_4_G | The CIF-Embedded .res File Contains DFIX Records |                    |   | 4     | Report |
| PLAT199_ALERT_1_G | Reported _cell_measurement_temperature .....     | (K)                |   | 293   | Check  |
| PLAT200_ALERT_1_G | Reported _diffn_ambient_temperature .....        | (K)                |   | 293   | Check  |
| PLAT302_ALERT_4_G | Anion/Solvent/Minor-Residue Disorder (Resd 4 )   |                    |   | 100%  | Note   |
| PLAT302_ALERT_4_G | Anion/Solvent/Minor-Residue Disorder (Resd 5 )   |                    |   | 100%  | Note   |
| PLAT304_ALERT_4_G | Non-Integer Number of Atoms in .....             | (Resd 4 )          |   | 3.49  | Check  |
| PLAT304_ALERT_4_G | Non-Integer Number of Atoms in .....             | (Resd 5 )          |   | 1.51  | Check  |
| PLAT432_ALERT_2_G | Short Inter X...Y Contact O3'                    | ..C32              | . | 3.00  | Ang.   |
|                   |                                                  | 1/2+x,3/2-y,1-z =  |   | 4_566 | Check  |
| PLAT432_ALERT_2_G | Short Inter X...Y Contact O5'                    | ..C12"             | . | 2.93  | Ang.   |
|                   |                                                  | -1/2+x,3/2-y,1-z = |   | 4_466 | Check  |
| PLAT606_ALERT_4_G | Solvent Accessible VOID(S) in Structure .....    |                    |   | 1     | Info   |
| PLAT720_ALERT_4_G | Number of Unusual/Non-Standard Labels .....      |                    |   | 6     | Note   |
| PLAT791_ALERT_4_G | Model has Chirality at C9                        | (Sohnke SpGr)      |   | R     | Verify |
| PLAT791_ALERT_4_G | Model has Chirality at C9'                       | (Sohnke SpGr)      |   | R     | Verify |
| PLAT791_ALERT_4_G | Model has Chirality at C9"                       | (Sohnke SpGr)      |   | R     | Verify |
| PLAT791_ALERT_4_G | Model has Chirality at C10                       | (Sohnke SpGr)      |   | R     | Verify |
| PLAT791_ALERT_4_G | Model has Chirality at C10'                      | (Sohnke SpGr)      |   | R     | Verify |
| PLAT791_ALERT_4_G | Model has Chirality at C10"                      | (Sohnke SpGr)      |   | R     | Verify |
| PLAT791_ALERT_4_G | Model has Chirality at C11                       | (Sohnke SpGr)      |   | S     | Verify |
| PLAT791_ALERT_4_G | Model has Chirality at C11'                      | (Sohnke SpGr)      |   | S     | Verify |
| PLAT791_ALERT_4_G | Model has Chirality at C11"                      | (Sohnke SpGr)      |   | S     | Verify |

|                   |                                                   |     |       |
|-------------------|---------------------------------------------------|-----|-------|
| PLAT860_ALERT_3_G | Number of Least-Squares Restraints .....          | 4   | Note  |
| PLAT869_ALERT_4_G | ALERTS Related to the Use of SQUEEZE Suppressed   | !   | Info  |
| PLAT910_ALERT_3_G | Missing # of FCF Reflection(s) Below Theta (Min). | 3   | Note  |
| PLAT912_ALERT_4_G | Missing # of FCF Reflections Above STh/L= 0.600   | 98  | Note  |
| PLAT941_ALERT_3_G | Average HKL Measurement Multiplicity .....        | 3.9 | Low   |
| PLAT978_ALERT_2_G | Number C-C Bonds with Positive Residual Density.  | 0   | Info  |
| PLAT992_ALERT_5_G | Repd & Actual _reflns_number_gt Values Differ by  | 4   | Check |

---

|    |                      |                                                              |
|----|----------------------|--------------------------------------------------------------|
| 0  | <b>ALERT level A</b> | - Most likely a serious problem - resolve or explain         |
| 0  | <b>ALERT level B</b> | - A potentially serious problem, consider carefully          |
| 16 | <b>ALERT level C</b> | - Check. Ensure it is not caused by an omission or oversight |
| 31 | <b>ALERT level G</b> | - General information/check it is not something unexpected   |
| 3  | ALERT type 1         | CIF construction/syntax error, inconsistent or missing data  |
| 15 | ALERT type 2         | Indicator that the structure model may be wrong or deficient |
| 6  | ALERT type 3         | Indicator that the structure quality may be low              |
| 21 | ALERT type 4         | Improvement, methodology, query or suggestion                |
| 2  | ALERT type 5         | Informative message, check                                   |

---

It is advisable to attempt to resolve as many as possible of the alerts in all categories. Often the minor alerts point to easily fixed oversights, errors and omissions in your CIF or refinement strategy, so attention to these fine details can be worthwhile. In order to resolve some of the more serious problems it may be necessary to carry out additional measurements or structure refinements. However, the purpose of your study may justify the reported deviations and the more serious of these should normally be commented upon in the discussion or experimental section of a paper or in the "special\_details" fields of the CIF. checkCIF was carefully designed to identify outliers and unusual parameters, but every test has its limitations and alerts that are not important in a particular case may appear. Conversely, the absence of alerts does not guarantee there are no aspects of the results needing attention. It is up to the individual to critically assess their own results and, if necessary, seek expert advice.

#### Publication of your CIF in IUCr journals

A basic structural check has been run on your CIF. These basic checks will be run on all CIFs submitted for publication in IUCr journals (*Acta Crystallographica*, *Journal of Applied Crystallography*, *Journal of Synchrotron Radiation*); however, if you intend to submit to *Acta Crystallographica Section C* or *E* or *IUCrData*, you should make sure that full publication checks are run on the final version of your CIF prior to submission.

#### Publication of your CIF in other journals

Please refer to the *Notes for Authors* of the relevant journal for any special instructions relating to CIF submission.

---

PLATON version of 19/02/2022; check.def file version of 19/02/2022
